## COVID-19 among migrants, refugees, and internally displaced persons: systematic review, meta-analysis and qualitative synthesis of the global empirical literature

Maren Hintermeier MSc <sup>a,b</sup>, Nora Gottlieb PhD <sup>b</sup>, Sven Rohleder MSc <sup>a,b</sup>, Jan Oppenberg BSc <sup>b</sup>, Mazen Baroudi PhD <sup>c</sup>, Sweetmavourneen Pernitez-Agan MTM <sup>d</sup>, Janice Lopez <sup>d</sup>, Sergio Flores MSc <sup>e</sup>, Amir Mohsenpour MD <sup>b</sup>, Kolitha Wickramage PhD <sup>f</sup>, Kayvan Bozorgmehr Prof. <sup>a,b\*</sup>

<sup>a</sup> Section Health Equity Studies & Migration, Department of General Practice and Health Services Research, University Hospital Heidelberg, Im Neuenheimer Feld 130.3, 69120 Heidelberg, Germany

<sup>b</sup> Department of Population Medicine and Health Services Research, School of Public Health, Bielefeld University, Universitätsstraße 25, 33615 Bielefeld, Bielefeld, Germany

<sup>c</sup> Department of Epidemiology and Global Health, Umeå University, Sweden

<sup>d</sup> Migration Health Division, International Organization for Migration, Manila, Philippines

<sup>e</sup> Department of Public Health and Caring Sciences, Uppsala University, Sweden

<sup>f</sup> UN Migration Agency Global Data Institute, Migration Health Division, International Organization for Migration, Berlin, Germany

\* Corresponding author

### SUMMARY

**Background:** Pandemic response and preparedness plans aim at mitigating the spread of infectious diseases and protecting public health, but migrants are often side-lined. Evidence amounted early that migrants are disproportionately affected by the COVID-19 pandemic and its consequences. However, synthesised evidence is lacking that quantifies the inequalities in infection risk and disease outcomes, or contextualises the consequences of pandemic measures and their underlying mechanisms.

**Methods:** Systematic review searching 25 databases and grey literature (12/2019 to 11/2021). We considered empirical articles covering migrants, refugees, asylum-seekers, and internally displaced persons reporting SARS-CoV-2 cases, hospitalisation, ICU admission, mortality, COVID-19 vaccination rates or health consequences of pandemic measures. Random-effects meta-analysis of observational studies and qualitative analysis were performed for evidence synthesis. A Protocol was registered with PROSPERO (CRD42021296952).

**Findings:** Out of 6956 studies, we included 241 in the review. For the quantitative studies (n=46), meta-analysis with over 40 million study participants showed that compared to non-migrants, migrants have an elevated risk of infection (RR = 2.33; 95%-CI: 1.88-2.89) but similar risk for hospitalisation (RR = 1.05; 0.80-1.37), while the likelihood of ICU admission was higher (RR = 1.36; 1.04-1.78). Among those hospitalised, migrants had a lower risk of mortality (RR = 0.47; 0.30-0.73), while their population-based excess mortality tended to be higher (RR = 1.31; 0.95-1.80). The qualitative synthesis (n=44) highlighted the complex interplay of social and COVID-19-related factors at different levels. This involved increased exposure, risk, and impact of pandemic measures that compromised the health of migrants.

**Interpretation:** Even in the advanced stages of the pandemic, migrants faced higher infection risks and disproportionately suffered from the consequences of COVID-19 disease, including deaths. Population-level interventions in future health emergencies must better consider socio-economic, structural and community-level exposures to mitigate risks among migrants and enhance health information systems, to close coverage gaps in migrant groups.

**Funding:** None.

**Keywords:** COVID-19; refugees; asylum seekers; IDP; migration; health inequality

**NOTE:** This preprint reports new research that has not been certified by peer review and should not be used to guide clinical practice.

## **Panel 1: Research in context**

### **Evidence before this study**

Reviews on inequalities in COVID-19-related health risks published in the early phase of the pandemic found that migrants were disproportionately affected by the pandemic. High infection risk and all-cause mortality, as well as severe mental burdens among migrants, were identified. However, the *magnitude* of inequalities in the risk of infection, hospitalisation, admission to intensive care units (ICU), mortality, or vaccination coverage between migrants and non-migrants has not been quantified. Studies conducted during the early phase of the pandemic found that poor working conditions, crowded housing, language barriers, and legal aspects are among the social determinants that intersect with migration, resulting in increased COVID-19-related risks. Evidence summaries published since then (covering studies until October 2021) focused on individual health effects of the pandemic, e.g., mental health, risk of infection, or severity of SARS-CoV-2 infections among migrants, and were limited in their geographic scope (e.g., focus on single countries, or high-income countries), the outcomes considered, or covered only single or specific migrant groups.

### **Added value of this study**

We mapped the global empirical literature and synthesised the available qualitative *and* quantitative literature (published in English, German and Spanish) on multiple COVID-19-related outcomes among diverse categories of migrants, as well as the impacts of the COVID-19 pandemic on migrant populations *worldwide* by the end of 2021. We quantified absolute and relative inequalities among over 40 million study participants (including migrant and resident populations) using random-effects meta-analyses for several outcomes such as risk of SARS-CoV-2 infection, hospitalisation, ICU admission and mortality. Our results showed higher infection risk among migrants compared to non-migrants, and hinted at different patterns by geographical or contextual exposures. As opposed to previous (narrative) systematic reviews, we found no evidence for increased hospitalisation risk, but higher risk for ICU admission and death as far as population-level estimates are considered.

The comparability of the data was hampered by the heterogeneity of studies and poor reporting quality, while the lack of disaggregated reporting for some outcomes (e.g., vaccination coverage) made it impossible to synthesise evidence on important dimensions of inequality between migrant and resident populations. Only seven studies (2.9% of all studies) addressed vaccination coverage. Three of those studies were conducted in the European context and reported lower vaccination rates among migrants (i.e., foreign-born individuals) compared with the non-foreign-born population. The opposite was found in a study from China. Two modelling studies recommended including migrants in vaccination strategies to prevent cases and increase cost-effectiveness, while one study focused on the effectiveness of a COVID-19 vaccine (rather than vaccination coverage). Findings from the qualitative synthesis uncover not only the ways in which interrelated social risks and inequalities (lack of social protection, working conditions, housing, legal uncertainties) engender severe and unique impacts on migrants; but they also pinpoint potential sources of resilience at individual, community and societal level (e.g., mindset, financial resources, mutual support, access to health information, trust in authorities, state assistance).

### **Implications of all available evidence**

Not only in the pandemic's early phases, but even by the end of 2021, migrants were at higher risk of SARS-CoV-2 infection. Once infected, migrants seemed to have more severe courses of disease requiring admission to ICU. Deaths among clinical populations were lower (likely due to different age-structures), but population-based excess mortality was higher in migrants. The venue for reducing such inequalities appears to be through population-level rather than clinical interventions. Socio-economic structures, risks in communities and specific contexts (worksites, accommodation centres) appeared as major drivers for higher infection risk and are likely to be part of the underlying causes of higher mortality. To address the challenges posed by the impact of COVID-19 on migrant health, and to better prepare for future health emergencies, it is urgently required to improve health information systems and ensure the inclusion of migrant populations in national pandemic response plans. Social and health equity policies and measures are needed to avoid future pandemic measures from unfolding (unintended) negative consequences for migrants.

## INTRODUCTION

Global health emergencies like the COVID-19 pandemic occur unpredictably, and effective responses require well elaborated and actionable preparedness strategies in line with the International Health Regulations.<sup>1</sup> National pandemic preparedness and response plans are part of such strategies and are supported by the WHO, e.g., through a strategic plan published on February 4, 2020, with subsequent ongoing elaboration.<sup>2,3</sup> However, migrants have been side-lined in such plans, prompting a call for urgent global action to consider migrants in pandemic responses from the Lancet Migration early in the pandemic (April 10,2020).<sup>4</sup>

Evidence from the early phase of the pandemic suggests that migrants were disproportionately affected by the COVID-19 pandemic. Reviews of the early literature found an increased risk of SARS-CoV-2 infection in migrant populations and elevated all-cause mortality compared to non-migrants.<sup>5,6</sup> Migrants living in crowded housing conditions, but also undocumented migrants and migrant healthcare workers, were found to be at higher infection risk.<sup>5,6</sup> A study examining outbreaks in German accommodation centres for asylum seekers and refugees found a significantly higher attack rate if indiscriminate mass-quarantine was applied to all camp inhabitants compared with targeted contact tracing.<sup>7</sup> Several studies identified risk factors such as precarious working conditions, crowded housing, language barriers, or legal restrictions among migrants and negative effects of pandemic control measures on mental health.<sup>5,6,8-10</sup>

Despite these early efforts to compile evidence on differential risks and exposures between migrant and resident populations, there is a lack of synthesised evidence quantifying the *magnitude* of inequalities in infection risk, consequences of disease, or vaccination rates. Furthermore, there is still a dearth of consolidated knowledge on the impact of pandemic response strategies on migrant health beyond studies published at the onset of the pandemic.

We conducted a systematic review covering the literature from 12/2019 to 11/2021 to map the global landscape of the empirical literature and synthesise the evidence in this field. We investigated the risk of SARS-CoV-2 infections and the consequences of disease (measured by hospitalisation, intensive care unit (ICU) admission, and mortality rates) among asylum seekers, refugees, migrants and internally displaced persons (IDP) compared to non-migrants; vaccination coverage among migrants and non-migrants; and the impact of lockdown and pandemic control measures on migrant health.

## METHODOLOGY

### Search strategy and selection criteria

We conducted a systematic literature review in line with the Preferred Reporting for Systematic Reviews and Meta-Analyses (PRISMA) guideline. Studies were eligible for inclusion if migrants, IDP, refugees or asylum seekers were studied (following definitions of the International Organisation for Migration (IOM)<sup>11</sup> and the United Nations High Commissioner (UNHCR)<sup>12</sup>); health effects of SARS-CoV-2 (cases, hospitalisation, ICU admission, mortality, vaccination) or corresponding policy measures among refugees and migrants were assessed; and if written in English, German or Spanish. We performed a search of the Cochrane Library and the WHO COVID-19 Research Database (representing a comprehensive source of 24 bibliographic databases), thereby updating and complementing the search of a previously published review covering all studies from 12/2019 to 11/2021.<sup>6</sup> All study designs were considered except case series, theoretical research papers, or policy analyses without empirical data. We included peer-reviewed articles, but also preprints and official reports from the IOM and European Public Health Association websites, as well as studies from previous reviews known to the authors. For systematic reviews, only the primary studies were considered. The review protocol was registered with PROSPERO (CRD42021296952).

Search terms were developed, refined and validated among the review team, and databases searched by experienced reviewers (SR, MH) of the Rapid Response Review Unit (RRRUN).<sup>13</sup> Website searches were performed by three reviewers (JL, SA, JO). Identified records were uploaded to a management tool for systematic reviews (Covidence), where two reviewers each screened title and abstracts independently. The same applied for full-texts. Discrepancies were resolved by a third reviewer (KB) and decisions were consented in constant discussion among the review team.

### Figure 1: PRISMA flow-chart

The volume of included articles required adjustments to the protocol regarding data extraction and quality assessment. Data extraction was done individually and cross-checked by MH. The following items were extracted: Generic bibliographic information (author, title, year published, journal); study objectives, hypothesis and research questions; study characteristics (research method, sample size, geography); population and context characteristics; findings (e.g., main outcomes in quantitative studies, major themes/minor themes in qualitative studies) and conclusions as reported.

The Joanna Briggs Institute's critical appraisal tools were used for the quality assessment, which was performed by pairs of two reviewers independently.<sup>14</sup> A quality score (range 0-100%, from lowest to highest quality) was constructed based on the answers of applied checklists (questions indicated as "not applicable" were not counted into the overall quality score in order to avoid artificial downrating of studies). For each study, the scores obtained from two independent ratings were averaged, and studies were grouped based on their scores and classified as high (100-75% of possible score), moderate (74-50%), and low (<50%) quality studies (Supplementary File, Table S5a-f). Rating discrepancies in case of considerably different scores were resolved by discussion among the team. The quality of modelling studies was assessed using an adapted instrument derived from existing tools as used in previous reviews.<sup>6,15-18</sup>

## Evidence Synthesis

We *descriptively* synthesised and mapped all studies (Panel 3), but applied different strategies and criteria for the *analytical* synthesis of qualitative and quantitative data. For the quantitative synthesis, we included only moderate- or high-quality studies that reported SARS-CoV-2 cases, hospitalisations, ICU admissions, and mortality among migrant *and* non-migrant populations, in order to draw reliable conclusions from the literature. We checked 169 quantitative studies with medium- or high-quality for their eligibility; studies reporting outcomes among migrants *without* comparison groups were excluded from the quantitative synthesis.

We performed meta-analyses for the binary outcomes (SARS-CoV-2 cases, hospitalisation, ICU admission and mortality) using the effect sizes relative risk (RR) and risk difference (RD), which allow estimation and interpretation of pooled proportional and absolute risk, respectively, associated with migratory status compared to non-migrants. Given that the denominators for mortality differed (i.e., deaths based on hospitalised cases or all deaths) we performed separate analyses. As we assume that studies are likely to have functional differences and that the true effect size  $\theta$  varies between studies, we fitted random-effects models using inverse variance weighting.<sup>19</sup> We carefully assessed the heterogeneity between studies, used sensitivity analyses to check for robustness of models, and performed explorative subgroup analyses (Panel 2).

### Panel 2: Measure of heterogeneity, sensitivity and subgroup analyses

The measure of between-study heterogeneity  $\tau^2$  estimates the variations in the true effect size  $\theta$ . It was calculated using the restricted maximum likelihood (REML) method and the Q-Profile method to compute corresponding 95% confidence intervals (95%-CI).<sup>19,20</sup> The measure  $I^2$  was not suitable for assessing heterogeneity, as it tends toward 100% when studies have large sample sizes, which is the case for many of the included studies. The measure  $\tau^2$ , however, is insensitive to the precision of the included studies. Based on  $\tau^2$ , we calculated a prediction interval (PI) that allows to quantify the range into which a future study might fall based on the evidence considered. The PI provides a meaningful interpretation of  $\tau^2$ .<sup>18</sup> We used the Kenward-Roger method to calculate the 95%-CI for both the pooled estimate  $\hat{\theta}$  and PI.<sup>21</sup> In addition, we performed subgroup analyses for study regions and migration indicators where appropriate, to identify possible explanations for heterogeneity. We used sensitivity analysis to carefully check the robustness of the models for each outcome and effect size and, as a result, excluded some studies from the meta-analysis. Therefore, we calculated influence diagnostics to detect extremely influential studies that have a high impact on  $\hat{\theta}$  and  $\tau^2$ . We excluded studies based on extreme or implausible values of standardised residuals, Cook's distance, hat value, and leave-one-out cross-validation (LOO-CV) to measure direct impact on  $\tau^2$  and  $\hat{\theta}$ .<sup>22</sup> See supplementary file pp. 102-117 for more information on the sensitivity analysis. Analysis and visualisations were performed using R 4.2.0 statistical programming language. Meta-analyses and sensitivity analyses were performed using the *meta* and *dmetar* packages.<sup>22,23</sup>

For qualitative synthesis, a coding scheme following the model of Diderichsen et al. was developed and the extracted data (i.e., main findings as reported by the included qualitative studies) was coded accordingly, using ATLAS.ti software.<sup>20</sup> The development of the coding scheme involved both inductive and deductive coding strategies. During the first round, codes were developed inductively from the data. They were then compared with and integrated in the existing model, which describes COVID-19-related inequalities for migrants in three categories: *exposure*, *risk*, and *impact*. Through iterative meetings (first within the qualitative analysis-team, then the entire review-team), we elaborated the original model as follows: 1) through inductive coding, we added further codes to the categories; 2) the original model was linear (from exposure to risk to impact), while our data showed many interrelations and feedback loops within and among the categories; 3) within each category, we distinguished between factors on the micro-, meso- and macro-level; 4) we added the category "*sources of resilience*", which interacts with the other three categories.

### Role of the funding source

There was no funding source for this study.

## RESULTS

The search yielded 7045 records from databases and 75 from websites. After removal of 164 duplicates, 6956 records were screened based on their title and abstract; 508 reports were sought for retrieval and 480 assessed for their eligibility whereof 255 did not meet the criteria (Fig. 1). Another 16 records were included based on previous reviews (n=8) or snowball sampling (i.e., primary studies from reviews) (n=8). A total of 241 studies were included to map the global empirical landscape (Panel 3). Of these, 44 qualified for qualitative synthesis (Table 1A) and 46 for meta-analysis (Table 1B).

### **Panel 3: Overview of identified global empirical literature on SARS-CoV-2 health outcomes and effects of pandemic control measures (e.g., lockdown) among migrants (12/2019 - 11/2021), N = 241 studies**

#### *Study designs*

Out of 241 included studies, 186 had a quantitative design (e.g., cross-sectional, longitudinal, cohort), including 18 modelling studies, 42 were qualitative research, and 13 studies had a mixed method design.

#### *Geographic scope*

Most studies were conducted in high-income countries (n=167), 35 studies took place in (upper) middle-income countries, 35 in lower middle-income countries, and only five studies were conducted in low-income countries. Some studies didn't have a specific country context (e.g. modelling studies) or looked at multiple countries.

#### *Migrant groups*

The migrant groups studied varied widely. Study populations consisted mainly of

*a)* international migrants (n=128) as defined by (a combination of) various indicators such as region of origin, country of birth, parents' country of birth, ethnicity, nationality, language-proficiency, or migrants/immigrants without further specification; *b)* international migrants with a specific legal status that we know of, including international students (n=10), refugees (n=36), asylum seekers (n=14), labour migrants (n=40), undocumented migrants (n=9), ICE detainees (n=3); *c)* IDP (n=5); *d)* internal migrants (mainly in India and China) (n=14); *e)* returnees (n=8); *f)* ecological / net migration flows (n=19).

#### *Health outcomes*

50 studies investigated infection risk, 28 transmission risk, 84 health outcomes of disease (i.e., SARS-CoV-2 cases, hospitalisation, ICU admission, mortality, or pneumonia), 16 health services access, 49 mental health, 69 looked at the effects of pandemic control measures (e.g., lockdown, mask wearing, etc.), and only seven studies addressed vaccination.

#### *Study quality*

Less than half of the studies (n=112, 46.5%) were classified as high quality, 92 (38.2%) as medium quality, and 37 (15.3%) as low quality.

See supplementary file Table S6, p.35ff. for study characteristics of all included studies.

**Table 1A: Characteristics of studies included in the qualitative synthesis**

| Author & year of publication | Country of study | Socio-economic Development of Country* | Period of Study                | migrant population          | Health outcomes                           | Study Design         | Main results (as reported)                                                                                                                                                                                                                                                                                                                                                                                                                                                                                                                                                                                                                                                                                                                                                                    | Conclusions (as reported)                                                                                                                                                                                                                                                                                                                                                                                                                                                                                                                                                                                                                             | Quality appraisal |
|------------------------------|------------------|----------------------------------------|--------------------------------|-----------------------------|-------------------------------------------|----------------------|-----------------------------------------------------------------------------------------------------------------------------------------------------------------------------------------------------------------------------------------------------------------------------------------------------------------------------------------------------------------------------------------------------------------------------------------------------------------------------------------------------------------------------------------------------------------------------------------------------------------------------------------------------------------------------------------------------------------------------------------------------------------------------------------------|-------------------------------------------------------------------------------------------------------------------------------------------------------------------------------------------------------------------------------------------------------------------------------------------------------------------------------------------------------------------------------------------------------------------------------------------------------------------------------------------------------------------------------------------------------------------------------------------------------------------------------------------------------|-------------------|
| Gele et al. 2022             | Norway           | HIC                                    | April 21, 2020 to May 15, 2020 | International migrants      | effect of lockdown measures mental health | Qualitative research | Mild depression (9.1%; 40/441) and anxiety (16.1%; 71/441) was common among respondents followed by moderate depression and anxiety {depression (3.4%; 15/441), anxiety (4.1%; 18/441)} and severe depression and anxiety {depression (1.1%; 5/441), anxiety (0.7%; 3/441)}. Anxiety and depression were independent of their socio-demographic characteristics. Perceived fear of contracting COVID-19, severity and death were prominent among the respondents. Respondents experienced stigma and discrimination in addition to being at the risk of disease and possible loss of employment and financial responsibilities. In addition, poor (quality and access to) health services, and poor living condition at the quarantine centres adversely affected respondents' mental health. | Although no statistically significant association of anxiety and depression with socio-demographic variables was observed, the qualitative approach identified various factors to contribute for their [returnee labor migrants] poor mental health. Institutional quarantine centers were in poor conditions in relation to basic supplies, health, hygiene and recreational support which adversely impacted mental health of the respondents. Measures towards alleviating fear and stigma and ensuring financial securities of the population during the time of health crisis are important for preparedness against epidemics such as COVID-19. | medium            |
| Babuc 2021                   | Turkey           | UMIC                                   | July 2020                      | Refugees                    | effect of lockdown measures               | Qualitative research | According to the findings of the study, the suspension or slowdown of economic activities due to the pandemic has caused not only an uncertainty about the future, but also a change in familial positions and roles. Also the accepted norms of social relations have been inevitably suspended resulting in increased ambiguity. Strengthening the network of solidarity within relatives and building stronger relationships within the family are common relational strategies of the participants to mitigate the social and economic impacts of the COVID-19 outbreak (...).                                                                                                                                                                                                            | Considering the fact that the lockdown measures can be tightened again at any time with respect to the increase in the spread of the disease, social and economic policies should be expanded to include the Syrian migrants. Also educational policies during the COVID-19 pandemic should include specific measures such as technological support and guidance to mitigate the risks and disadvantages that Syrian children experience in terms of distance learning.                                                                                                                                                                               | medium            |
| Biddle et al. 2021           | Germany          | HIC                                    | May 1, 2020 to July 31, 2020   | Asylum Seekers and Refugees | mental health                             | Qualitative research | We found substantial heterogeneity of measures taken to prevent infection, inform refugees, maintain social and health services, test for SARS-CoV-2 and quarantine positive cases. Effective inter-sectoral cooperation proved to be particularly important for coordination and implementation of measures. Need for support was expressed with regard to the improvement of infrastructure, opportunities to work with language interpreters and stronger involvement of local health experts.                                                                                                                                                                                                                                                                                             | Amidst multiple actors and the complexity of structures and processes, the admission authorities have been taking on essential responsibilities related to infection control on an ad hoc basis, without being sufficiently positioned to do so. In order to further contain the pandemic, a strengthening of centralised, setting-specific recommendations and information as well as their translation through the pro-active involvement of the public health authorities at the local level are essential.                                                                                                                                        | medium            |
| Bojorquez et al. 2021        | Mexico           | UMIC                                   | April 2020 to May 2020         | International migrants      | mental health                             | Qualitative research | In addition to fear of contagion and economic insecurity, migrants experienced emotional distress associated with hardening migration policies, and the difficulties of having to find shelter in place in non-                                                                                                                                                                                                                                                                                                                                                                                                                                                                                                                                                                               | To conclude, our results suggest that, as other authors anticipated, the COVID-19 pandemic and lockdown measures have important mental health consequences for migrants. (...) As recommended by inter-national                                                                                                                                                                                                                                                                                                                                                                                                                                       | high              |

|                              |       |      |                                                                |                             |                             |                      |                                                                                                                                                                                                                                                                                                                                                                                                                                                                                                                                                                                                                                                                  |                                                                                                                                                                                                                                                                                                                                                                                                                                                                                                                                                                                                                                                                                                                                             |        |
|------------------------------|-------|------|----------------------------------------------------------------|-----------------------------|-----------------------------|----------------------|------------------------------------------------------------------------------------------------------------------------------------------------------------------------------------------------------------------------------------------------------------------------------------------------------------------------------------------------------------------------------------------------------------------------------------------------------------------------------------------------------------------------------------------------------------------------------------------------------------------------------------------------------------------|---------------------------------------------------------------------------------------------------------------------------------------------------------------------------------------------------------------------------------------------------------------------------------------------------------------------------------------------------------------------------------------------------------------------------------------------------------------------------------------------------------------------------------------------------------------------------------------------------------------------------------------------------------------------------------------------------------------------------------------------|--------|
|                              |       |      |                                                                |                             | health services access      |                      | private spaces. Some CSOs continued or adapted previous psychosocial support activities, helping migrants navigate these issues, but other activities stopped amidst physical distancing measures and because of limited resources. Migrants themselves implemented some group activities. There was a surge of civil society initiatives of online support, but some shelters leaked the techno-logical and other resources to benefit from them.                                                                                                                                                                                                               | organizations, instead of being limited to clinical interventions, this response should prioritize the psychosocial aspects that are the root of mental health problems in these types of populations, covering basic needs such as decent work, appropriate places to live, and access to education and health services.                                                                                                                                                                                                                                                                                                                                                                                                                   |        |
| Da Mosto et al. 2021         | Italy | HIC  | April 2020 to September 2020                                   | Asylum Seekers and Refugees | mental health               | Qualitative research | Even though various measures were implemented in reception centres (i.e. mass quarantine, supply of personal protective equipment, risk communication campaigns and specific governance tools) they often had a discriminatory approach towards migrants and only considered the biomedical aspects of COVID-19, excluding its social roots and repercussions. This factor, together with the lack of an effective governance system at both the local and the national level, was the most relevant issue associated with the management of the syndemic in reception facilities and affected all the social determinants that shape the health profile of RAS. | The study revealed the importance of social factors in the management of the syndemic in reception centres. It also highlighted how the underlying causes of the impact of COVID-19 are tightly correlated to the political and social approaches of local and national institutions to migration. In order to guarantee the well-being of society as a whole and successfully control the epidemic, it is necessary to consider migration as a human reality rather than an emergency, and demolish all the policies and bureaucratic systems that act as structural violence on RAS. (...) This way it will be possible to develop more inclusive approaches to public health and guarantee the conditions for RAS' empowerment.          | medium |
| de Diego-Cordero et al. 2021 | Spain | HIC  | April 2019 to September 2020                                   | Migrant workers             | mental health               | Qualitative research | The results show the moral debt accrued by the caregivers with the family who employ them, while worsening the physical and psychological health of many of the care-givers, due to both work overload and fear of the global pandemic.                                                                                                                                                                                                                                                                                                                                                                                                                          | The emotional debt and the relationship as 'quasi-family members' have contributed to increasing the work overload, since as well as the usual care, they have been responsible for all the domestic work, resulting in a non-stop working day during the lockdown, without any personal free time and being separated from the social group of their friends who live in Spain.                                                                                                                                                                                                                                                                                                                                                            | high   |
| Mookerjee et al. 2021        | India | LMIC | 3 months into the lockdown (presumably: May 2020 to July 2020) | Internal migrants           | effect of lockdown measures | Qualitative research | Financial worries were found to be endemic, with rising debt a major source of stress, and educational qualifications becoming an obstacle to earning. Returning migrants were suspected of bringing the virus from the city, and so stigmatized in their home towns and villages. However, the pandemic lockdown also showed some un-expected healthful consequences. It provided these marginalized, and always busy workers the time and space to stop working for a while, to stay home, eat home food, and take walks in the comparatively green and clean spaces of their home environments.                                                               | Any future policy about migrants must prioritize addressing the extreme financial precarity of internal migrants. This study shows the need for a kind of social security or insurance to get workers through low-or-no-income periods, but further research focused on the economic structural constraints experienced by migrant workers is necessary to shape such policy. (...) The pandemic lockdown as an enabler of health is one of three inversions that emerged in this culture-centered study (...) In this, the pandemic lockdown may be seen to have enabled a measure of agency and health in the lives of these workers, an oasis albeit temporary, and ultimately subject to the demands of the globalized cities of India. | high   |
| Duggal et al. 2021           | India | LMIC | April 2020 to June 2020                                        | Internal migrants           | effect of lockdown measures | Qualitative research | Participants reported that they were afraid of dying alone in the city without their families around so they decided to go back home. At the same time the stress of being back home without any way of financially                                                                                                                                                                                                                                                                                                                                                                                                                                              | The research used an intersectional frame to understand how different social identities of migrant status, gender and class coalesce together to generate unique forms of marginalization. It calls for future policy and practice                                                                                                                                                                                                                                                                                                                                                                                                                                                                                                          | high   |

|                      |                |      |                                    |                             |                             |                                                            |                                                                                                                                                                                                                                                                                                                                                                                                                                                                                                                                                                                                                                                  |                                                                                                                                                                                                                                                                                                                                                                                                                                                                                                                                                                                                                                                                                                                                                                                            |        |
|----------------------|----------------|------|------------------------------------|-----------------------------|-----------------------------|------------------------------------------------------------|--------------------------------------------------------------------------------------------------------------------------------------------------------------------------------------------------------------------------------------------------------------------------------------------------------------------------------------------------------------------------------------------------------------------------------------------------------------------------------------------------------------------------------------------------------------------------------------------------------------------------------------------------|--------------------------------------------------------------------------------------------------------------------------------------------------------------------------------------------------------------------------------------------------------------------------------------------------------------------------------------------------------------------------------------------------------------------------------------------------------------------------------------------------------------------------------------------------------------------------------------------------------------------------------------------------------------------------------------------------------------------------------------------------------------------------------------------|--------|
|                      |                |      |                                    |                             |                             |                                                            | supporting themselves and their families generated great amounts of uncertainty and helplessness in the participants. They experienced feelings of guilt and frustration at not being able to find a job and worried constantly about the future. Participants reported experiencing worries about the future, helplessness and a fear that the world and 'normal life' was about to change indefinitely. Their sense of personal agency and certainty was taken away almost overnight which generated distress in them.                                                                                                                         | work to acknowledge and integrate the lived experiences of those who remain on the edges, invisible yet critical backbones of a well-functioning and harmonious society. Finally, it emphasises that the pandemic is just a mirror being held up to all of us- and the 'reflections' and 'lessons' need to be carried forward, remembered, documented and transformed into action that is meaningful to the lives of people.                                                                                                                                                                                                                                                                                                                                                               |        |
| Elci et al. 2021     | Turkey         | UMIC | April 5, 2020 to August 2020       | Refugees                    | effect of lockdown measures | Mixed-Methods: Cross-Sectional Study; Qualitative research | Our findings indicate that the initial Covid-19 measures had a higher financial impact on Syrians than on citizens when controlled for employment, wealth, and education, among other variables. In line with the literature, our research confirms that disasters' socio-economic effects disproportionately burden minority communities.                                                                                                                                                                                                                                                                                                       | Our findings reveal that being a refugee in Turkey accelerates and magnifies the pandemic's perceived economic impact, even after controlling for social class, demographic factors, and geographical location. (...) While signalling the unequal outcomes of the Covid-19 pandemic, our research also addresses the underlying causes of these outcomes, as well as the implications of the pandemic for the future. As the Syrian displacement reached its 10th year, our results show that the livelihood of Syrians in Turkey is very much tied to the functioning of the labour market, characterised by widespread informality.                                                                                                                                                     | medium |
| Enriquez et al. 2021 | USA            | HIC  | March 2020 to June 2020            | Undocumented migrants       | effect of lockdown measures | Mixed-Methods: Cross-Sectional Study; Qualitative research | Qualitative findings showed that immigration status exacerbated the negative economic impact of the pandemic, leading to severe individual and family financial strains that had cascading negative effects on undocumented students' academics and health. Quantitative findings focused on students' own prepandemic economic insecurity to show that it was associated with worse academic, financial, and health impacts during the initial months of the pandemic.                                                                                                                                                                          | Qualitative findings highlighted how campus resources such as study space and technology were no longer available, harming students' academics. Thus, our findings suggest that the benefits of campus-wide resources, (...), depend on a continuous rather than cumulative provision of services. The quantitative results also demonstrated that being a student in the UC system, versus the CSU, was positively associated with increased negative academic, financial, and health impacts. Differences may emerge because UC campuses host a much larger number of on-campus residential students and offer more support services, thus inflicting a greater burden on UC undocumented students who were forced to relocate to their permanent homes and cut off from campus support. | high   |
| Knights et al. 2021  | United Kingdom | HIC  | June 18, 2020 to November 30, 2020 | Asylum Seekers and Refugees | effect of lockdown measures | Qualitative research                                       | It was found that digitalisation had exacerbated existing inequalities regarding access for some migrant groups through a lack of access to, or knowledge of, technology; concerns about language barriers, difficulties building trust, and the risk of missing safeguarding cues in virtual consultations were also expressed. The physical closure of some surgeries was reported to have led to challenges in migrants registering with, and accessing, primary care. Communication barriers, feeling left behind in receiving support and health interventions in comparison to the general population, and a lack of access to information | Pandemic-related changes to primary care delivery may become permanent; some migrant groups are at risk of digital exclusion and may need targeted additional support to access services. Solutions are needed to address vaccine hesitancy in marginalised groups to ensure equitable COVID-19 vaccine uptake.                                                                                                                                                                                                                                                                                                                                                                                                                                                                            | high   |



|                          |             |     |                                                                                 |                             |                             |                      |                                                                                                                                                                                                                                                                                                                                                                                                                                                                                                                                                                        |                                                                                                                                                                                                                                                                                                                                                                                                                                                                                                                                                                                                                                                                                                                                         |        |
|--------------------------|-------------|-----|---------------------------------------------------------------------------------|-----------------------------|-----------------------------|----------------------|------------------------------------------------------------------------------------------------------------------------------------------------------------------------------------------------------------------------------------------------------------------------------------------------------------------------------------------------------------------------------------------------------------------------------------------------------------------------------------------------------------------------------------------------------------------------|-----------------------------------------------------------------------------------------------------------------------------------------------------------------------------------------------------------------------------------------------------------------------------------------------------------------------------------------------------------------------------------------------------------------------------------------------------------------------------------------------------------------------------------------------------------------------------------------------------------------------------------------------------------------------------------------------------------------------------------------|--------|
|                          |             |     |                                                                                 |                             |                             |                      | were issues widely raised by migrants. Additionally, they reported views of COVID-19 and COVID-19 vaccinations that ranged from acceptance to misinformation, often originating from social media or word of mouth. Some migrants experienced increased risk factors to their health and severe illness from COVID-19, partially resulting from their economic and social situations.                                                                                                                                                                                  |                                                                                                                                                                                                                                                                                                                                                                                                                                                                                                                                                                                                                                                                                                                                         |        |
| Filippi & Giliberti 2021 | Italy       | HIC | February 2020 to May 2020                                                       | Asylum Seekers and Refugees | effect of lockdown measures | Qualitative research | By analyzing the transformation of Italian reception policies in the last years, the article shows the relationship between these changes and the condition of refugees and asylum seekers in these centers during the COVID-19 pandemic. Overcrowded housing, the absence of institutional guidance on managing the situation, and the interruption of many migrants' migratory projects are the main findings that emerged.                                                                                                                                          | Our analysis encourages us to reflect upon two points. The first reflection is that the pandemic, as a new "total social event," adds another layer of complexity to the Italian reception system, which was already under duress due to the Salvini Decree that introduced changes that did not benefit refugees and asylum seekers. The second reflection is that the pandemic has amplified and brought to the fore those pre-existing dynamics of marginalization and exclusion, which often feature in the stories of migrants who enter the Italian reception system.                                                                                                                                                             | medium |
| Geuijen et al. 2021      | Netherlands | HIC | May 2020 to June 2020                                                           | International migrants      | effect of lockdown measures | Qualitative research | Through taking into account experiences of support workers, this study reported on the impact of the COVID-19 pandemic upon Dutch migrant families who have children with ID. Two main themes related to the COVID-19 pandemic were identified: Work of support workers during the COVID-19 pandemic and Impact of the COVID-19 pandemic upon migrant families who have children with ID. Given that video calling often proved to be an unsuitable alternative (children did not understand) through which to stay in touch, parents missed their children very much. | The current study makes us cognisant of the fact that migrant families who have children with ID have encountered unique challenges (language barriers and emergency care plan) during the COVID-19 pandemic, whereas other challenges (additional burden and missing children who live at residential facilities) are in accordance with the challenges experienced by families not from a migrant background. Consequently, in light of the potential future waves of COVID-19 and expected further lockdowns, it is important that support workers are aware of the importance of language barriers, cultural background, and the increased burden associated with staying in touch with migrant families who have children with ID. | medium |
| Guruge et al. 2020       | Canada      | HIC | First six months of the pandemic (summer and fall 2020) (not further specified) | International migrants      | effect of lockdown measures | Qualitative research | Results revealed that parenting experiences during the pandemic entailed dealing with changing relationships, coping with added burdens and pressures, living in persistent fear and anxiety, and rethinking lifestyles and habits. Amid these changes and challenges, some parents managed to create opportunities for their children to improve their diet, take a break from their rushed lives, get in touch with their cultural and linguistic backgrounds, and spend more quality time with their family.                                                        | While immigrant parents exhibit remarkable resilience in dealing with the pandemic-related meso and macro-levels restrictions, funding and programs are urgently needed to support them in addressing the impact of these at the microlevel.                                                                                                                                                                                                                                                                                                                                                                                                                                                                                            | high   |
| Hari et al. 2021         | Canada      | HIC | April 2020 to June 2020                                                         | International students      | effect of lockdown measures | Qualitative research | We found that international students experienced the pandemic transnationally and faced increased challenges, which heightened their reliance on support from transnational families, and generated anxieties about their future career and mobilities.                                                                                                                                                                                                                                                                                                                | We know from this study that IS are drawing on their transnational resources, it is, therefore, imperative that we rethink locally based supports. (...) There is a need to provide more effective locally emplaced, pragmatic, emotional and social support. These recommendations                                                                                                                                                                                                                                                                                                                                                                                                                                                     | high   |

|                       |                  |     |                            |                 |                                                            |                                                            |                                                                                                                                                                                                                                                                                                                                                                                                                                                                                                                                                                                                                                                                                                                          |                                                                                                                                                                                                                                                                                                                                                                                                                                                                                                                                                                                                                                                                                                                             |      |
|-----------------------|------------------|-----|----------------------------|-----------------|------------------------------------------------------------|------------------------------------------------------------|--------------------------------------------------------------------------------------------------------------------------------------------------------------------------------------------------------------------------------------------------------------------------------------------------------------------------------------------------------------------------------------------------------------------------------------------------------------------------------------------------------------------------------------------------------------------------------------------------------------------------------------------------------------------------------------------------------------------------|-----------------------------------------------------------------------------------------------------------------------------------------------------------------------------------------------------------------------------------------------------------------------------------------------------------------------------------------------------------------------------------------------------------------------------------------------------------------------------------------------------------------------------------------------------------------------------------------------------------------------------------------------------------------------------------------------------------------------------|------|
|                       |                  |     |                            |                 |                                                            |                                                            |                                                                                                                                                                                                                                                                                                                                                                                                                                                                                                                                                                                                                                                                                                                          | require multi-stakeholder engagement and support, including universities (as key anchors for this group), governmental bodies (Immigration, Refugees and Citizenship Canada, Employment and Social Development Canada, as well as provinces and municipalities) and civil society organizations.                                                                                                                                                                                                                                                                                                                                                                                                                            |      |
| Im & George 2021      | USA              | HIC | April 2020 to October 2020 | Refugees        | effects of lockdown measures<br><br>health services access | Mixed-Methods: Cross-Sectional Study; Qualitative Research | Providers highlighted several preexisting health challenges that have been barriers for the refugee community before the pan-demic. The rapid assessment highlighted that underlying health concerns and limited orientation to the U.S. healthcare systems were identified as two main overarching themes that have caused challenges to the refugee community. (...) For refugees, the impact of the COVID-19 pandemic manifests through multiple factors such as health, social, and economic hardships, which were likely exacerbated by barriers to access to virtual service platforms and resources and communication breakdown with service providers.                                                           | This study proposes several implications for future research and policy in social work with refugee populations during the post-COVID time. (...) The COVID-19 pandemic uncovers cumulative issues that have obstructed healthcare and social services in the refugee community and demands a more culturally nuanced, multipronged approach to refugee community wellness and integration through building capacity and collaborative partnerships among professionals and members, and volunteers of the refugee community.                                                                                                                                                                                               | high |
| Lui et al. 2021       | Hong Kong, China | HIC | May 2020 to August 2020    | Migrant workers | effects of lockdown measures                               | Qualitative research                                       | FDWs [foreign domestic workers] reported a dual-country experience of the pandemic, where they expressed concerns about local transmission risks as well as worries about their family members in their home country. Changes to their current work situation included how their employers treated them, as well as their employment status. FDWs also cited blind spots in the Hong Kong policy response that also affected their experience of the pandemic, including a lack of support from the Hong Kong government.                                                                                                                                                                                                | The current study demonstrates that the COVID-19 pandemic has exacerbated the existing power dynamics that constrain FDWs in Hong Kong. Not only is there a greater need to provide for family members back in FDWs' home countries, but there are also increased pressures from employers and a lack of support from the Hong Kong government. Through this study's findings of the current situation and challenges faced by FDWs in Hong Kong during the COVID-19 pandemic, it is clear that policy-level interventions are needed to mitigate the particularly negative effects on FDWs. More supportive policies should be adopted that not only consider the specific needs of FDWs but listens to them.              | high |
| Kaur-Gill et al. 2021 | Singapore        | HIC | Not reported               | Migrant workers | mental health                                              | Qualitative research                                       | The findings in our article reveal the interplays of mental health meanings situated within a structural context of employment and a cultural environment that manifests unequal power relationships and indebtedness. During the Circuit Breaker, domestic workers in already poor employment conditions found themselves at greater precarity and limited agency. Furthermore, the analysis captures the temporalities of mental health meanings articulated within the performance of conducting migrant domestic work in confined working conditions. Precarious migrant journeys include vicious debt cycles, unethical agents, and corrupt employment practices, detailing the scripts of mental health stressors. | Our findings reveal that the COVID-19 pandemic lockdowns magnified how these practices of soft violence (...) manifested, disabling migrant worker mental health and well-being. As precarity is structured in the power imbalance to hire, fire, and deport domestic workers at will by employers, practical implications for mental health interventions must discuss labor and immigration policies of MDWs [migrant domestic workers] bound to Singapore. (...) Beyond culturally tailored programs on mental well-being in the workplace, solutions must consider the structural factors embedded in the policies of hire and the indentured nature of labor to address MDWs discussions of mental health contentions. | high |

|                            |                                          |      |                                |                        |                                              |                                                            |                                                                                                                                                                                                                                                                                                                                                                                                                                                                                                                                                                                                                                                                                                                     |                                                                                                                                                                                                                                                                                                                                                                                                                                                                                                                                                                                                                                                                                                                                                                      |        |
|----------------------------|------------------------------------------|------|--------------------------------|------------------------|----------------------------------------------|------------------------------------------------------------|---------------------------------------------------------------------------------------------------------------------------------------------------------------------------------------------------------------------------------------------------------------------------------------------------------------------------------------------------------------------------------------------------------------------------------------------------------------------------------------------------------------------------------------------------------------------------------------------------------------------------------------------------------------------------------------------------------------------|----------------------------------------------------------------------------------------------------------------------------------------------------------------------------------------------------------------------------------------------------------------------------------------------------------------------------------------------------------------------------------------------------------------------------------------------------------------------------------------------------------------------------------------------------------------------------------------------------------------------------------------------------------------------------------------------------------------------------------------------------------------------|--------|
| Kuhlmann et al. 2020       | Austria, Germany, Italy, Poland, Romania | HIC  | January 2020 to May 20, 2020   | Migrant workers        | effect of lockdown measures                  | Qualitative research                                       | Results suggest that undersupply of carers coupled with cash benefits and a culture of family responsibility may result in high inflows of migrant carers, who are channelled in low-level positions or the informal care sector. COVID-19 made the fragile labour market arrangements of migrant carers visible, which may create new health risks for both the individual carer and the population.                                                                                                                                                                                                                                                                                                               | The results highlight the weaknesses of existing health labour market arrangements in the LTC sector, which stretch far beyond poor workforce management. As the COVID-19 pandemic revealed, these conditions may directly impact population health and the health and wellbeing of the migrant carers, thus becoming fundamentally a public health policy issue. The research also calls for European health labour market regulation and governance models, which help to balance national interests and connect health system needs, health labour markets and the individual migrant carers. Including LTC migrant carers more systematically in health workforce governance and research, therefore, must become an issue of public health and European policy. | high   |
| Kumar et al. 2021          | India                                    | LMIC | March 24, 2020 to May 31, 2020 | Internal migrants      | mental health                                | Qualitative research                                       | (...), the findings suggest that the participants' plights have been exacerbated by the COVID-19 pandemic. (...) As our participants reported, they dealt with multiple hardships, including loss of jobs and income, police brutality, Othering, and differential treatment, difficulties accessing health services, food, cash transfer and other social programmes during the first COVID-19 pandemic nationwide lockdown. (...) Consequently, many of them became anxious, and were uncertain about their future. With no money and savings, many participants struggled to live and survive during the lockdown.                                                                                               | The findings indicate the need for policy responses to focus on addressing conditions of work, terms of employment and access to necessities for Indian MW, including ensuring conditions for a prompt job-ready recovery and mental health care after the COVID-19 pandemic.                                                                                                                                                                                                                                                                                                                                                                                                                                                                                        | medium |
| Li et al. 2021             | China                                    | UMIC | January 2020 to July 2020      | Internal migrants      | effect of lockdown measures<br>mental health | Mixed-Methods: Cross-Sectional Study; Qualitative Research | The research revealed three distinct long-term vulnerabilities faced by migrant worker families experiencing difficulties: physical/material, motivational/ attitudinal and social/organisational. At the same time, during our project helping migrant workers fight COVID-19, we recognised these families' capacities.                                                                                                                                                                                                                                                                                                                                                                                           | Thus, we believe that sustainable and systematic intervention is needed to establish a long-term service mechanism for migrant workers' disaster management, and improve social security policies, provision and regulations. This will promote disaster management awareness and behaviour change among migrant worker families, improve the flexibility and quality of social services, effectively reduce the vulnerabilities of migrant worker families and enhance their capacities.                                                                                                                                                                                                                                                                            | medium |
| Martin-Anatias et al. 2021 | New Zealand                              | HIC  | May 2020 to June 2020          | International migrants | effect of lockdown measures                  | Mixed-Methods: Cross-Sectional Study; Qualitative Research | Both our survey and our interviews indicated that many women, particularly mothers, experienced increased demands on their time and emotional energy in comparison to men, particularly in fields related to childcare and domestic labour, and that they also experienced a decline in wellbeing linked to heightened levels of exhaustion and stress. (...) Their [Indonesian migrant mothers] stresses were instead linked to feelings of anxiety, frustrations and inadequacy with homeschooling their children in English (...) our research indicates that both second-language speaking status and a prevailing gender ideology of 'state Ibumism' (as opposed to neoliberal feminism) were critical factors | Our research corroborates prevailing conclusions offered by existing work on gender relations during the 2020 coronavirus pandemic in NZ and beyond. (...) While feminist scholars are certainly correct to highlight the pervasiveness of gendered inequality during lockdown, an attention to distinct meanings of womanhood and motherhood afford a more nuanced approach, illuminating how lockdowns can offer not only gendered challenges but also gendered rewards, and cast light on measures that could be taken in future to enhance the experience of living through a lockdown in one's intersectional specificity.                                                                                                                                      | medium |

|                                  |           |      |                                      |                        |                                                           |                      |                                                                                                                                                                                                                                                                                                                                                                                                                                                                                                                                                                                                                                  |                                                                                                                                                                                                                                                                                                                                                                                                                                                                                                                                                                                                                                                                                                                                                                                                                                                                                          |        |
|----------------------------------|-----------|------|--------------------------------------|------------------------|-----------------------------------------------------------|----------------------|----------------------------------------------------------------------------------------------------------------------------------------------------------------------------------------------------------------------------------------------------------------------------------------------------------------------------------------------------------------------------------------------------------------------------------------------------------------------------------------------------------------------------------------------------------------------------------------------------------------------------------|------------------------------------------------------------------------------------------------------------------------------------------------------------------------------------------------------------------------------------------------------------------------------------------------------------------------------------------------------------------------------------------------------------------------------------------------------------------------------------------------------------------------------------------------------------------------------------------------------------------------------------------------------------------------------------------------------------------------------------------------------------------------------------------------------------------------------------------------------------------------------------------|--------|
|                                  |           |      |                                      |                        |                                                           |                      | differentiating Indonesian migrant mothers' experiences from those of many other mothers in NZ.                                                                                                                                                                                                                                                                                                                                                                                                                                                                                                                                  |                                                                                                                                                                                                                                                                                                                                                                                                                                                                                                                                                                                                                                                                                                                                                                                                                                                                                          |        |
| Martuscelli 2021                 | Brazil    | UMIC | March 27, 2020 to April 6, 2020      | International migrants | effect of lockdown measures                               | Qualitative research | The results indicate that refugees face three challenges connected to this pandemic: (a) same challenges as Brazilians due to their labor vulnerability social identity, (b) challenges aggravated by the pandemic due to their identity of nonnationals including access to information and services, and (c) new challenges due to their social identity of forced displaced nonnationals including closing of migration services and borders and the feeling of "living the pandemic twice."                                                                                                                                  | This study reinforces the need to understand how forcibly displaced people in the Global South are affected by pandemics and responses to them adopting an intersectionality approach, especially in situations that are not refugee camps, like Brazil. Granting refugees the possibility to reflect on their experiences provides valuable insight on how to involve and engage them in responses to global health emergencies.                                                                                                                                                                                                                                                                                                                                                                                                                                                        | high   |
| Nasol & Francisco-Menchavez 2021 | USA       | HIC  | 2017 to 2020 (not further specified) | Migrant workers        | effect of lockdown measures<br><br>health services access | Qualitative research | Based on quantitative and qualitative data with Filipino workers before and during the COVID-19 crisis, we find that RCFEs have failed to comply with labor standards long before the pandemic where the lack of state regulation denied health and safety protections for home care workers. The racial inequities under COVID-19 via the neoliberal approach to the crisis puts home care workers at more risk. (...) Last, while the experiences of Filipino home care workers during the pandemic expose the elder care industry's exploitation, we find that they are also creating strategies to take care of one another. | Our study demonstrates how legal protections and public assistance, or the lack thereof, is a major social determinant of care workers' health. The experiences of Filipino home care workers during the COVID-19 pandemic broadly expose the elder care industry's exploitation of racialized migrant workers and the government's neglect in protecting them, endangering key essential workers during a historical public health crisis. And yet, we have found that Filipino care workers are crafting "communities of care" that circulate different forms and ethics of care among themselves. (...) Although these informal networks are not a sustainable replacement for state-sponsored health care and health resources, we uplift the innovative strategies of Filipino care workers to demonstrate their ingenuity and commitment to caring for themselves and one another. | medium |
| Qi & Ma 2021                     | Australia | HIC  | February 2020 to November 2020       | International students | effect of lockdown measures                               | Qualitative research | Our thematic analysis highlights participants' experiences and views of Australia's crisis responses in the four areas of financing, third-country transit, visas and immigration, and pandemic management.                                                                                                                                                                                                                                                                                                                                                                                                                      | How countries live up to their values is critical to their global reputation and soft power. Australia has a range of soft power strengths. Nevertheless, ill-considered policies have also caused much international and domestic criticism, especially in areas such as climate change, asylum seekers and foreign aid. The list has extended to include its treatment of temporary migrants including international students. Australia needs to push for a broader vision for international education that enhances its international engagement not only for economic gains, but also for effective communication of Australia's democratic and inclusive values.                                                                                                                                                                                                                   | high   |
| Rao et al. 2020                  | India     | LMIC | December 1, 2019 to June 2020        | Migrant workers        | effect of lockdown measures                               | Qualitative research | While social identity and regional location are seen as established mediators of migrant experiences, in the present context their role and impact was subdued. Social policy frameworks in the destination states, or their absence, played a key role in shaping migrant experience. Kerala, with a better social infrastructure, but also a specific legal and policy framework recognizing the role and contributions of migrant                                                                                                                                                                                             | Constitution of India offers all citizens the freedom to live and work in any part of the country, yet the pandemic exposed the loopholes in ensuring rights in the context of population mobility, placing the spotlight on the nature of rights and their portability. While this is critical, the discursive agenda of social protection is now focused only on basic needs to food and shelter, rather than a transformational agenda that could                                                                                                                                                                                                                                                                                                                                                                                                                                     | medium |

|                      |                |           |                        |                        |                             |                                                            |                                                                                                                                                                                                                                                                                                                                                                                                                                                                                                                                                                                                                                                                                                                                                                                                                                                                  |                                                                                                                                                                                                                                                                                                                                                                                                                                                                                                                                                                                                          |        |
|----------------------|----------------|-----------|------------------------|------------------------|-----------------------------|------------------------------------------------------------|------------------------------------------------------------------------------------------------------------------------------------------------------------------------------------------------------------------------------------------------------------------------------------------------------------------------------------------------------------------------------------------------------------------------------------------------------------------------------------------------------------------------------------------------------------------------------------------------------------------------------------------------------------------------------------------------------------------------------------------------------------------------------------------------------------------------------------------------------------------|----------------------------------------------------------------------------------------------------------------------------------------------------------------------------------------------------------------------------------------------------------------------------------------------------------------------------------------------------------------------------------------------------------------------------------------------------------------------------------------------------------------------------------------------------------------------------------------------------------|--------|
|                      |                |           |                        |                        |                             |                                                            | workers as 'guest workers', was able to respond more effectively to their needs and demands. Amongst the other states, Maharashtra falls in between: with some recognition of workers' rights yet divided by a strong movement of regional pride and exclusivity. Gujarat and Uttar Pradesh emerge at the bottom, offering no rights or benefits to the migrant workers, and in fact, denying any claims to citizenship that they put forth.                                                                                                                                                                                                                                                                                                                                                                                                                     | eventually ensure equal opportunities and choices to all citizens of the country to lead fulfilling lives.                                                                                                                                                                                                                                                                                                                                                                                                                                                                                               |        |
| Reynolds et al. 2021 | Mexico         | UMIC      | August 2020            | Asylum Seekers         | effect of lockdown measures | Qualitative research                                       | The pandemic caused significant mental health burdens but no perceived adverse physical effects, with the U.S. border closure and health care access barriers as more pressing concerns. Participants reported access to information about COVID-19 but had varied levels of know-ledge and adherence to disease reduction strategies due to camp conditions. Most participants believed that they had special protection from COVID-19, including strong immune systems or from God. The nongovernmental organizations providing health care and sanitation faced multiple challenges to implement new policies to manage COVID-19. The institution of required temperature checks and quarantine of COVID-19 positive patients led to distrust, decreased seeking of health care services among asylum seekers, and possible underreporting of COVID-19 cases. | Our findings among asylum seekers in a Matamoros camp highlight the challenges to implementing disease reduction policies in low-resource congregate camps. Policies to address disease outbreaks focusing on the social determinants of health, health care access barriers, and community engagement may be more acceptable to asylum seekers, suggesting the need for effective strategies to provide prevention information that complements such measures.                                                                                                                                          | medium |
| Sabar et al. 2021    | Israel         | HIC       | March 2020 to May 2020 | International migrants | effect of lockdown measures | Mixed-Methods: Qualitative research; Cross-Sectional Study | During the lockdown, the challenges embedded in caregiving in Israel were amplified and new challenges emerged, such as the inability to leave the employer's premises, which some likened to being imprisoned. The major hardships voiced in all interviews were loneliness, fear of contracting the virus, worries about the safety of their families back home, and anger at restrictions imposed without consulting them by the assisted living facilities or their employers. At the same time, they expressed sincere gratitude for being employed, paid and safe.                                                                                                                                                                                                                                                                                         | Philanthropy for Filipinos in need in Israel and back home was found to be an effective coping mechanism. While lockdown conditions increased the fragility of the marginalized migrant workers, their ability to donate funds empowered them at both individual and communal levels. Developing a donor identity reinforced their sense of belonging to the Filipino community in Israel and back home.                                                                                                                                                                                                 | medium |
| Sanna 2021           | Romania/ Italy | UMIC/ HIC | March 2020             | Returnees              | effect of lockdown measures | Qualitative research                                       | Among the reasons to return during the pandemic that my informants mentioned there were: the sudden loss of a job due to temporary or permanent closing of businesses during the lockdown in Italy and elsewhere; the closing of universities, in the case of Romanian students studying abroad; and the impossibility of affording healthcare in a foreign country due to not having a regular work contract. In other cases, of course, it was the fear of being sick in a foreign country that mattered most.                                                                                                                                                                                                                                                                                                                                                 | In this paper, I have shown how the image of returning migrants during the first month of the COVID-19 pandemic in Romania was constructed by the media in March 2020: by very quickly associating the migrants with the virus, by juxta-posing the noble acts of Romanians left in Italy with the criminal acts of those who came back, and by reinforcing such juxta-position by giving voice to Romanians who stayed in Italy. I have also shown that Romanians who did not come back were characterized in depth, while descriptions of returning Romanians, except for a few cases, remained vague. | medium |

|                              |            |      |                             |                                                           |                                            |                      |                                                                                                                                                                                                                                                                                                                                                                                                                                                                                                                                                                                                                                                                                                                                                                                                                |                                                                                                                                                                                                                                                                                                                                                                                                                                                                                                                                                                                                                                                                                                                                           |        |
|------------------------------|------------|------|-----------------------------|-----------------------------------------------------------|--------------------------------------------|----------------------|----------------------------------------------------------------------------------------------------------------------------------------------------------------------------------------------------------------------------------------------------------------------------------------------------------------------------------------------------------------------------------------------------------------------------------------------------------------------------------------------------------------------------------------------------------------------------------------------------------------------------------------------------------------------------------------------------------------------------------------------------------------------------------------------------------------|-------------------------------------------------------------------------------------------------------------------------------------------------------------------------------------------------------------------------------------------------------------------------------------------------------------------------------------------------------------------------------------------------------------------------------------------------------------------------------------------------------------------------------------------------------------------------------------------------------------------------------------------------------------------------------------------------------------------------------------------|--------|
| Sanò & Della Puppa 2021      | Italy      | HIC  | February 2020 to May 2020   | International migrants                                    | effect of lockdown measures                | Qualitative research | These two interviews show how the mobility and immobility of these subjects were differently conditioned by the intersection of several factors. (...) That is to say, the closure of the Trentino hotels and restaurants during the winter season has meant that most of the migrants employed in this sector have moved to the city, determining, among other things, the opening of services to low threshold able to accommodate all the people left without work in the valleys. On the contrary, in the Plain of Gioia Tauro, the slowdown in production was not determined by a general closure of agricultural activities, but, mainly, by the fact that, at the beginning of the pandemic, a good part of the labourers present were without regular contract and thus could not go to the workplace. | The ethnographic cases we described show the need to rethink the conceptual categories with which we usually analyse mobility, illuminating the links it has with national policies, with territorial administrative provisions, with the economic and social fabric of an area, with individual and not necessarily 'rational' choices of individuals. Observed in these terms and based on these links, one of the distinctive features of contemporaneity, namely mobility, reveals all its political nature, the disempowering character that accompanies it, as well as the economic interests connected to the productive function of those who find themselves imprisoned in the multiplicity facets of the prism of (im)mobility. | medium |
| DeCarlo Santiago et al. 2021 | USA        | HIC  | June 2020 to July 2020      | International migrants (including international students) | effect of lockdown measures                | Qualitative research | Qualitative analyses revealed three major categories of themes. Challenges include difficulty adjusting; fear, worry, and uncertainty; financial concerns; academic challenges; lack of connection. Sources of Support include school and community supports. Coping and Adaptation includes the ways families have coped with COVID-19.                                                                                                                                                                                                                                                                                                                                                                                                                                                                       | Despite limitations, the present study highlights the numerous difficulties that newcomer families are experiencing during COVID-19. Although increased distress is common (...), newcomer families may experience difficulties that are compounded by the resettlement experience or barriers based on status. In particular, schools must attend to digital literacy, accessible information (...), regular connection to teachers and school staff, in addition to challenges associated with basic necessities, health, and social-emotional distress. Professional development training focused on newcomer experiences could ensure all school staff are equipped with the knowledge and tools necessary to support newcomer youth. | medium |
| Singh et al. 2020            | India      | LMIC | Not reported                | Migrant workers                                           | effect of lockdown measures; mental health | Qualitative research | Our study found that physiologic requirements, safety, and security were the predominant needs of the migrant workers during their stay in a shelter home during COVID-19-related lockdown. All of the migrants were satisfied with the need-based services provided to them in Chandigarh. The migrant workers were worried about being infected by COVID-19 and were uncertain about when they would be able to return to their native homes.                                                                                                                                                                                                                                                                                                                                                                | Lockdown drained migrant workers both physically and emotionally. Despite their hardship and suffering, most of the migrant workers supported the government's decision to impose lockdown. Comprehensive support should be provided to all migrant workers in all states of India to combat the migrant crisis. This support, as was provided in Chandigarh during lockdown, would safeguard the well-being of migrant workers in India.                                                                                                                                                                                                                                                                                                 | medium |
| Sohel et al. 2021            | Bangladesh | LMIC | April 2020 to November 2020 | Migrant workers                                           | effect of lockdown measures                | Qualitative research | The results show that COVID-19 induced lockdown significantly affects informal migrants' household food security. Most participants report severe complications due to food insecurity like consuming less food, price hiking, no fish or meat, potato, and vegetable. Food insecurity leads to migrant's chronic food shortage, starvation, malnutrition of mother and children, and unhealthy food. As a result, the way of life of informal migrants has been directed to more fragility and vulnerability during the pandemic; even they are not affordable to maintain a minimal level of family affairs and necessity.                                                                                                                                                                                   | The COVID-19 led pandemic lockdown severely impacts food security among informal migrants' households. Most households confront enormous problems and challenges to meet up the daily food and its associated elements. (...) Moreover, they did not get what they needed at the time of the crisis caused by the COVID-19 pandemic at a satisfactory level from the government and other agencies. This study also uncovers the post-lockdown reality of impoverished informal migrants who are often excluded from Bangladesh's social safety net facilities.                                                                                                                                                                           | medium |

|                        |       |      |                                 |                                     |                                            |                       |                                                                                                                                                                                                                                                                                                                                                                                                                                                                                                                                                                                                                                                                                                                                               |                                                                                                                                                                                                                                                                                                                                                                                                                                                                                                                                                                                                                                                                                                                                                      |        |
|------------------------|-------|------|---------------------------------|-------------------------------------|--------------------------------------------|-----------------------|-----------------------------------------------------------------------------------------------------------------------------------------------------------------------------------------------------------------------------------------------------------------------------------------------------------------------------------------------------------------------------------------------------------------------------------------------------------------------------------------------------------------------------------------------------------------------------------------------------------------------------------------------------------------------------------------------------------------------------------------------|------------------------------------------------------------------------------------------------------------------------------------------------------------------------------------------------------------------------------------------------------------------------------------------------------------------------------------------------------------------------------------------------------------------------------------------------------------------------------------------------------------------------------------------------------------------------------------------------------------------------------------------------------------------------------------------------------------------------------------------------------|--------|
| Srivastava et al. 2021 | India | LMIC | Not reported                    | Internal migrants                   | effect of lockdown measures; mental health | Qualitative research  | The findings of the present research shows that internal migrant workers were highly affected due to the global pandemic, which bombarded multiple stressors on them causing physical stress, emotional stress, and social stress in their lives, which were created due to financial crisis, lack of social support, and fear and uncertainty related to the global pandemic. However, the workers looked after the options available to them and chose problem-oriented strategy by directly dealing with the crisis, emotion-oriented strategy by family and friends' support, as well as cognitive appraisal of the pandemic situation by bringing optimistic thoughts to deal with these stressors.                                      | The present work strengthens the earlier studies on uncovering the stresses of migrant workers along with suggesting available options to deal with them and emphasizes the role of family and proper emotional support in the management of pandemic-related stress among internal migrant workers.                                                                                                                                                                                                                                                                                                                                                                                                                                                 | medium |
| Tang et al. 2021       | China | UMIC | April 2002 to July 2020         | Rural migrants                      | effect of lockdown measures                | Qualitative research  | The study finds that rural migrants suffered from serious social impacts due to COVID-19, especially during the associated lock-down period. Despite some similar impacts, influences of COVID-19 varied among rural migrants at different life-cycle stages, due to variations in human capital, family burdens, role in a household, and ability to find part-time work. Receiving little support from governments and employers, rural migrants tended to adopt household strategies to deal with difficulties related to COVID-19. Within a household, they assisted each other and worked as a unit to maximize resources and reduce risks. Traditional family values were highly praised by rural migrant households during the period. | Receiving little support from government and employers, rural migrants in China have to adopt a household strategy as a means of survival when they cope with disaster. If governments want to reduce the burden of COVID-19 on disadvantaged households, they need to pay more attention to rural migrants, even though they are neither local urban residents nor actual rural residents. (...) In the long-term, the social security system for rural migrants should be further improved. It is necessary to expand the accessibility of basic social services, such as medical insurance, housing funds, and pensions to rural migrants, and to include rural migrants in the housing security system, in case they experience difficult times. | medium |
| Thomas et al. 2021     | India | LMIC | March 1, 2020 to April 27, 2020 | Migrants workers, Refugees          | effect of lockdown measures                | Qualitative research  | The outcomes of this study shed light on (1) the most urgent needs that need to be addressed per population group, (2) the variety of state-level responses as well as best practices observed to deal with mitigation issues and (3) opportunities for quick relief as well as more long-term solutions.                                                                                                                                                                                                                                                                                                                                                                                                                                     | The COVID-19 pandemic has not only reduced people's means of maintaining a livelihood but has simultaneously revealed some of India's long-standing problems with infrastructure and resource distribution in a range of sectors, including nutrition and health, education, etc. There is an urgent need to construct effective pathways to trace and respond to those people who are desolate, and to learn from – and support – good practices at the grassroot level.                                                                                                                                                                                                                                                                            | medium |
| Tosh et al. 2021       | USA   | HIC  | August 2020 to November 2020    | ICE detainees                       | risk of infection                          | Qualitative research  | Our findings suggest that migrant detention and deportation present distinct challenges that undermine attempts to contain the spread of COVID-19. We provide testimonies from migrant detainees who speak to these challenges in unsettling personal terms. Our interviews highlight the insufficient actions by Immigration and Customs Enforcement (ICE) to contain the spread of the pandemic and a troubling lack of due process in immigration court proceedings.                                                                                                                                                                                                                                                                       | Based on these findings, we argue that reducing the number of migrants detained in the United States is needed not only in the context of the COVID-19 pandemic but also as a preventative measure for future health crises. Reductions can be achieved, in part, by reforming federal immigration laws on “mandatory detention.”                                                                                                                                                                                                                                                                                                                                                                                                                    | medium |
| B.C. et al. 2021       | Nepal | LMIC | April 21, 2020 to               | Internal and International migrants | mental health                              | Mixed-Methods: Cross- | Mild depression (9.1%; 40/441) and anxiety (16.1%; 71/441) was common among respondents followed by moderate depression and anxiety {depression (3.4%; 15/                                                                                                                                                                                                                                                                                                                                                                                                                                                                                                                                                                                    | Depression and anxiety were high among quarantined population and warrants more research. Institutional quarantine centers of Karnali province of Nepal were in                                                                                                                                                                                                                                                                                                                                                                                                                                                                                                                                                                                      | high   |

|                     |           |      |                                |                 |                                                                      |                                                            |                                                                                                                                                                                                                                                                                                                                                                                                                                                                                                                                                                                                                                                                                                                                                                                                                         |                                                                                                                                                                                                                                                                                                                                                                                                                                                                                                                                                                                                                                              |        |
|---------------------|-----------|------|--------------------------------|-----------------|----------------------------------------------------------------------|------------------------------------------------------------|-------------------------------------------------------------------------------------------------------------------------------------------------------------------------------------------------------------------------------------------------------------------------------------------------------------------------------------------------------------------------------------------------------------------------------------------------------------------------------------------------------------------------------------------------------------------------------------------------------------------------------------------------------------------------------------------------------------------------------------------------------------------------------------------------------------------------|----------------------------------------------------------------------------------------------------------------------------------------------------------------------------------------------------------------------------------------------------------------------------------------------------------------------------------------------------------------------------------------------------------------------------------------------------------------------------------------------------------------------------------------------------------------------------------------------------------------------------------------------|--------|
|                     |           |      | May 15, 2020                   |                 |                                                                      | Sectional Study; Qualitative Research                      | 441), anxiety (4.1%; 18/441)} and severe depression and anxiety {depression (1.1%; 5/441), anxiety (0.7%; 3/441)}. Anxiety and depression were independent of their socio-demographic characteristics. Perceived fear of contracting COVID-19, severity and death were prominent among the respondents. Respondents experienced stigma and discrimination in addition to being at the risk of disease and possible loss of employment and financial responsibilities. In addition, poor (quality and access to) health services, and poor living condition at the quarantine centres adversely affected respondents' mental health.                                                                                                                                                                                     | poor conditions which adversely impacted mental health of the respondents. Poor resource allocation for health, hygiene and living conditions can be counter-productive to the population quarantined.                                                                                                                                                                                                                                                                                                                                                                                                                                       |        |
| Bauza et al. 2021   | India     | LMIC | May 2020 to July 2020          | Returnees       | effect of lockdown measures                                          | Mixed-Methods: Cross-Sectional Study; Qualitative Research | Respondents reported high compliance with important preventative measures, including staying home as much as possible (94%), social distancing (91%), washing hands frequently (96%), and wearing a facial mask (95%). Additionally, many respondents reported job loss (31%), financial challenges (93%), challenges related to staying home whether as a preventative measure or due to lockdowns (57%), changes in types and/or amount of food consumed (61%), and adverse emotional effects as a result of the pandemic and lockdown. (...) Although the research revealed high compliance with preventative measures, the pandemic and associated lockdowns also led to many challenges and hardships faced in daily life particularly around job loss, economic security, food security, and emotional wellbeing. | The results underscore the vulnerability of marginalized populations to the pandemic and the need for measures that increase resilience to large-scale shocks. (...) In particular, there is a need for greater government response to limit harm to livelihood and mental, social, and nutritional health during any lockdown periods required to reduce disease spread.                                                                                                                                                                                                                                                                    | high   |
| Vosko & Spring 2021 | Canada    | HIC  | 2020-2021 (not specified)      | Migrant workers | effect of lockdown measures<br><br>Other: health outcomes of disease | Mixed-Methods: Primarily Qualitative Research              | Although estimates vary by source, over 1000 migrant farmworkers in Ontario tested positive for COVID-19 between April and July 2020. Thus, while Ontario documented 36594 cases by July 2020 (i.e. 250 per 100000) (...), the rate of infection among migrant farmworkers, 20,015 of whom entered Ontario during the spring and summer growing season, was approximately 4996 cases per 100000 people. (...) The magnitude of illness among migrant farmworkers in Southern Ontario, and Canada more broadly, reflects the emphasis, deeply ingrained in programs emblematic of migration management such as the SAWP, on keeping labour costs low in the interest of protecting the national food supply.                                                                                                             | Taking Southern Ontario as its focus, this article reveals how the federal government response to COVID-19 in agriculture perpetuated the effects of longstanding laws and policies requiring migrant farmworkers, circumscribed in their ability to politically mobilize on account of their institutionalized deportability, to shoulder disproportionate amounts of economic, social, and health risks. Centering the transnational character of migrant farmworkers' renewal, it identifies meaningful interventions to limit the structural disempowerment of migrant farmworkers and the externalization of their social reproduction. | medium |
| Yee et al. 2021     | Singapore | HIC  | June 21, 2020 to July 16, 2020 | Migrant workers | mental health                                                        | Qualitative research                                       | Three theme categories were derived from 27 interviews: migrant worker concerns during COVID-19, coping during COVID-19 and priorities after COVID-19. Major stressors in the crisis included the inability to continue providing for their families when work is disrupted, their susceptibility to infection in crowded dormitories, the shock of receiving the COVID-19                                                                                                                                                                                                                                                                                                                                                                                                                                              | We identified coping strategies employed by the workers in quarantine, many of which were made possible through the considered design of care and service delivery in mass quarantine facilities in Singapore. These can be adopted in the set-up of other mass quarantine facilities around the world to support the health and mental well-being of those quarantined.                                                                                                                                                                                                                                                                     | medium |



|                                                                                                                                                                                                                                    |                              |      |                                 |                                                  |                                                                                  |                      |                                                                                                                                                                                                                                                                                                                                                                                                                                                                                                                                                                                                                                                                                                                                                                                                                                                                                     |                                                                                                                                                                                                                                                                                                                                                                                                                                                                                                                                                        |        |
|------------------------------------------------------------------------------------------------------------------------------------------------------------------------------------------------------------------------------------|------------------------------|------|---------------------------------|--------------------------------------------------|----------------------------------------------------------------------------------|----------------------|-------------------------------------------------------------------------------------------------------------------------------------------------------------------------------------------------------------------------------------------------------------------------------------------------------------------------------------------------------------------------------------------------------------------------------------------------------------------------------------------------------------------------------------------------------------------------------------------------------------------------------------------------------------------------------------------------------------------------------------------------------------------------------------------------------------------------------------------------------------------------------------|--------------------------------------------------------------------------------------------------------------------------------------------------------------------------------------------------------------------------------------------------------------------------------------------------------------------------------------------------------------------------------------------------------------------------------------------------------------------------------------------------------------------------------------------------------|--------|
|                                                                                                                                                                                                                                    |                              |      |                                 |                                                  |                                                                                  |                      | diagnosis while asymptomatic, as well as the isolating conditions of the quarantine environment. The workers coped by keeping in contact with their families, accessing healthcare, keeping updated with the news and continuing to practise their faith and religion. They looked forward to a return to normalcy after the crisis with keeping healthy and having access to healthcare as new priorities.                                                                                                                                                                                                                                                                                                                                                                                                                                                                         | Our findings highlight the importance of targeted policy intervention for migrant workers, in areas such as housing and working environments, equitable access to healthcare, and social protection during and after this crisis.                                                                                                                                                                                                                                                                                                                      |        |
| Zambrano-Barragan et al. 2021                                                                                                                                                                                                      | Peru, Colombia               | UMIC | July 2020 to September 2020     | International migrants                           | health services access                                                           | Qualitative research | We found that forced migrants from Venezuela in both Colombia and Peru face common obstacles along their access trajectories to healthcare, which we summarize as legal, financial, and relating to discrimination and information asymmetry. By limiting effective access to care during the pandemic, these obstacles have also affected migrants' ability to cover the costs of basic needs, particularly food and housing. Our study also found a prevalent reliance on alternative forms of care, such as telemedicine, easy-to-access pharmacies, and extra-legal care networks.                                                                                                                                                                                                                                                                                              | We conclude that COVID-19 has exacerbated pre-existing conditions of informality and health inequities affecting Venezuelan migrants in Colombia and Peru. (...) These findings also provide guidance for specific policy recommendations. Given legal and financial obstacles, it is important to facilitate access to public health services irrespective of migratory status. Access should give special attention to COVID-19 care in the short and medium term but should focus on creating and strengthening systems of access in the long term. | medium |
| Hargreaves et al. 2021                                                                                                                                                                                                             | EU/ EEA countries and the UK | -    | June 15, 2020 to March 10, 2021 | Asylum Seekers, Refugees, International migrants | effect of lockdown measures<br><br>Other: health outcomes of disease vaccination | Qualitative research | Some migrants have experienced a range of direct and indirect health and social impacts including increased discrimination, more protracted lockdowns and severe restrictions on movement, and travel restrictions and border closures impacting family reunifications and the asylum process. Migrants in precarious work environments may have been at increased risk of losing jobs and sources of income. Certain migrant groups have a range of risk factors and vulnerabilities to COVID-19 that put them at higher risk of exposure, including occupational risk, overcrowded accommodation (including residing in camps, detention facilities, and homeless shelters), and/or lower levels of accessibility to public health services and messaging. There is emerging evidence of low COVID-19 vaccination rates in some migrant and ethnic minority groups in the EU/EEA. | These findings have immediate implications for national public health responses to reduce transmission and support COVID-19 vaccine rollout, with implications beyond the pandemic to promote health equity, human rights, and universal health coverage in marginalised migrant populations.                                                                                                                                                                                                                                                          | medium |
| Lusambili et al. 2020                                                                                                                                                                                                              | Kenya                        | LMIC | October 2020                    | Refugees                                         | Health services access                                                           | Qualitative research | Our findings suggest that within the first eight months of COVID-19, preferences for home deliveries by refugee women increased and health care workers reported having observed reduced utilisation of services and delayed care. Fear, economic challenges and lack of migrant-inclusive health system policies were key factors influencing home deliveries and delayed and low uptake of facility-based care.                                                                                                                                                                                                                                                                                                                                                                                                                                                                   | Findings from this study show the need for refugee inclusive public health policies, particularly during a pandemic, and the need to tailor health care services for refugees at facilities and in communities. The findings also make clear the urgent need to mitigate and lower barriers that prevent refugee women from seeking care at health facilities. Lastly there is need for methodological design tailored towards refugees' unique needs                                                                                                  | medium |
| *: Socioeconomic Development of Country based on the World Bank country classification by income; HIC: High income countries; UMIC: Upper-middle income countries; LMIC: Lower-middle income countries; LIC: Low income countries. |                              |      |                                 |                                                  |                                                                                  |                      |                                                                                                                                                                                                                                                                                                                                                                                                                                                                                                                                                                                                                                                                                                                                                                                                                                                                                     |                                                                                                                                                                                                                                                                                                                                                                                                                                                                                                                                                        |        |

**Table 1B: Characteristics of studies included in meta-analysis**

| Author & year of publication | Country of study | Socio-economic Development of Country* | Period of Study                     | migrant population     | Health outcomes                                                      | Study Design          | Main results (as reported)                                                                                                                                                                                                                                                                                                                           | Conclusions (as reported)                                                                                                                                                                                                                                                                                                                                                                                   | Quality appraisal |
|------------------------------|------------------|----------------------------------------|-------------------------------------|------------------------|----------------------------------------------------------------------|-----------------------|------------------------------------------------------------------------------------------------------------------------------------------------------------------------------------------------------------------------------------------------------------------------------------------------------------------------------------------------------|-------------------------------------------------------------------------------------------------------------------------------------------------------------------------------------------------------------------------------------------------------------------------------------------------------------------------------------------------------------------------------------------------------------|-------------------|
| Al Awaidy et al. 2021        | Oman             | HIC                                    | February 4, 2020 to July 23, 2020   | International migrants | health outcomes of disease: hospitalisation ICU admissions Mortality | Cross-Sectional Study | Patients hospitalized with COVID-19 infection were mostly Omani nationals and males between 30 and 39 years old ( $p < 0.001$ ). The mortality rate was 7.7 per 100,000 population ( $n=359$ ) with rates of 9.4 ( $n=278$ ) and 4.8 ( $n=81$ ) deaths per 100,000 population in Omani nationals and foreign-born individuals, respectively.         | Identifying the epidemiological characteristics and outcomes of COVID-19-infected patients is essential for developing targeted intervention strategies and preparing for the resurgence of anticipated second and third waves of this pandemic.                                                                                                                                                            | high              |
| Aradhya et al. 2021          | Sweden           | HIC                                    | March 12, 2020 to February 23, 2021 | International migrants | health outcomes of disease: Mortality                                | Cohort study          | Our study shows that immigrants have excess COVID-19 mortality regardless of the origin of their partner, where having a Swedish-born partner is only partially protective against COVID-19 mortality among immigrants from LMIC.                                                                                                                    | (...) these findings show that lack of awareness of the Swedish recommendations and language barriers are not major drivers for the excess COVID-19 mortality of immigrants. At the same time, the fact that Swedes partnered with immigrants also show excess mortality compared with Swedish couples, suggests that excess mortality among immigrants is explained by differential exposure to the virus. | high              |
| Canevelli et al. 2020        | Italy            | HIC                                    | February 21, 2020 to April 29, 2020 | International migrants | health outcomes of disease: Mortality                                | Cross-Sectional Study | The proportions of natives and migrants among the COVID-19-related deaths (95.7% and 2.5%, respectively) were similar to the relative all-cause mortality rates estimated in Italy in 2018 (97.4% and 2.6% respectively). Migrants were younger at the time of death compared to natives (71.1, SD 13.1 years vs 78.3, SD 10.8 years; $p < 0.001$ ). | The clinical phenotype of migrants dying with COVID-19 was similar to that of natives except for the younger age at death. International migrants living in Italy do not have a mortality advantage for COVID-19 and are exposed to the risk of poor outcomes as their native counterparts.                                                                                                                 | medium            |
| Casanova et al. 2022         | USA              | HIC                                    | May 5, 2020 to September 15, 2020   | Undocumented migrants  | health outcomes of disease: SARS-CoV-2 cases                         | Cohort study          | (...) the overall September 15 cumulative case rate was 214 per 1000 people (5810 cases among 27 189 people); ICE reported 6 deaths.                                                                                                                                                                                                                 | Cumulative case rates among people detained by ICE are higher than those of the US population and dwarf those of surrounding communities.                                                                                                                                                                                                                                                                   | medium            |
| Coyer et al. 2021            | The Netherlands  | HIC                                    | February 29, 2020 to May 31, 2020   | International migrants | health outcomes of disease: hospitalisation                          | Cross-Sectional Study | Hospitalisation DSR were more than two-fold higher in individuals with a non-Western migration background compared to ethnic-Dutch individuals ( $RR = 2.36$ , $95\%CI = 2.17-2.54$ ), with 57 additional hospitalisations per 100,000 population ( $RD = 57.05$ , $95\%CI = 43.34-70.75$ ).                                                         | City districts with lower economic and health status and those with a non-Western migration background had the highest burden of COVID-19 during the first wave of COVID-19 in Amsterdam.                                                                                                                                                                                                                   | high              |
| D'Ambrosi et al. 2021        | Italy            | HIC                                    | March 1, 2020 to April 30, 2020     | International migrants | health outcomes of disease: SARS-CoV-2 cases                         | Cross-Sectional Study | (...) foreign pregnant women (crude $OR = 3.32$ ; $95\%CI: 1.89-5.81$ ) showed a significantly higher risk of infection. Ethnicity was still significantly associated with an increased risk of COVID-19 (mutually adjusted $OR = 2.15$ ; $95\%CI: 1.12-4.11$ ) when taking into account the effect of other sociodemographic characteristics.       | In conclusion, the socioeconomic conditions we described are characteristic of contemporary immigration patterns. These factors altogether increase the risk of viral transmission by droplets and contact within households, ultimately reducing the effectiveness of lockdown and social distancing.                                                                                                      | high              |

|                           |                                               |     |                                     |                             |                                                                     |                                     |                                                                                                                                                                                                                                                                                                                                                                                                                                                                                                                                                                                                                        |                                                                                                                                                                                                                                                                                                                                                                                                                                                                                                                                                         |        |
|---------------------------|-----------------------------------------------|-----|-------------------------------------|-----------------------------|---------------------------------------------------------------------|-------------------------------------|------------------------------------------------------------------------------------------------------------------------------------------------------------------------------------------------------------------------------------------------------------------------------------------------------------------------------------------------------------------------------------------------------------------------------------------------------------------------------------------------------------------------------------------------------------------------------------------------------------------------|---------------------------------------------------------------------------------------------------------------------------------------------------------------------------------------------------------------------------------------------------------------------------------------------------------------------------------------------------------------------------------------------------------------------------------------------------------------------------------------------------------------------------------------------------------|--------|
| Diaz-Menendez et al. 2021 | Spain                                         | HIC | February 25, 2020 to April 19, 2020 | International migrants      | health outcomes of disease: ICU admission                           | Cross-sectional Study               | (...) being a migrant decreased the probability of dying (OR: 0.22; 95% CI 0.15-0.33; P <0.001) after adjusting for sex, age and comorbidities.                                                                                                                                                                                                                                                                                                                                                                                                                                                                        | (...) although the high rates of infection and consulting later than Spanish natives, being a younger and healthier population may have conditioned a more favourable outcome of the disease in this group.                                                                                                                                                                                                                                                                                                                                             | medium |
| Dressler et al. 2021      | Germany                                       | HIC | April 27, 2020 to December 6, 2020  | Asylum Seekers and Refugees | health outcomes of disease: hospitalisation                         | Cross-Sectional Study; Cohort study | 53 (1.6) outbreaks in asylum accommodations with 603 (2.7) cases with a median cases of 8 (4-14). (...) median age was 26 (17-34 IQR), 13 (0.9) cases were hospitalized and 1 (0.1) cases were deceased.                                                                                                                                                                                                                                                                                                                                                                                                               | Our analysis highlights the necessity of targeted, setting-specific approaches to control transmission in this vulnerable population.                                                                                                                                                                                                                                                                                                                                                                                                                   | high   |
| Engjom et al. 2021        | Finland, Denmark, Norway, Sweden, and Iceland | HIC | March 1, 2020 to June 30, 2020      | International migrants      | health outcomes of disease: hospitalisation                         | Cross-Sectional Study               | The risk of admission due to COVID-19 was 0.4/1000 deliveries in Denmark, Finland and Norway, and 3.8/1000 deliveries in the Swedish regions. Women hospitalized because of COVID-19 were more frequently obese (p<0.001) and had a migrant background (p<0.001) compared with the total population of women who delivered in 2018. Twelve women (21.4%) needed intensive care.                                                                                                                                                                                                                                        | This multinational Nordic study showed a low risk of admission due to COVID-19 in pregnancy in the Nordic countries. Women admitted to hospital due to COVID-19 were more frequently obese or had a migrant background compared with non-infected women.                                                                                                                                                                                                                                                                                                | high   |
| Erfani et al. 2021        | USA                                           | HIC | April 1, 2020 to August 31, 2020    | ICE detainees               | health outcomes of disease: SARS-CoV-2 cases                        | Cohort study                        | On August 31, ICE reported 5379 cumulative COVID-19 cases and 6 related deaths among its detainees. Cases were reported in 92 of 135 facilities, with 20 facilities accounting for 71% of cases. From April to August 2020, the mean monthly case rate ratio for detainees, compared with the US population, was 13.4 (95% CI, 8.0-18.9), ranging from 5.7 to 21.8 per month. The mean monthly test rate ratio for detainees, compared with the US population, was 4.6 (95% CI, 2.5-6.7), ranging from 2.0 to 6.9 per month.                                                                                           | Despite ICE's mitigation efforts, COVID-19 case rates among detainees increased every month from April to August. (...) COVID-19 spread within facilities may be partially due to challenges faced implementing the Pandemic Response Requirements. An independent assessment of facilities' mitigation strategies is necessary to identify and address existing gaps in these efforts.                                                                                                                                                                 | medium |
| Fabiani et al. 2021       | Italy                                         | HIC | February 20, 2020 to July 19, 2020  | International migrants      | health outcomes of disease: hospitalisation ICU admission Mortality | Cross-Sectional Study; Cohort study | The results show that, at this stage of the COVID-19 epidemic in Italy, non-Italian cases were more likely to be hospitalized (Adj. RR=1.39, 95% CI: 1.33-1.34) and to be admitted to ICU (Adj. RR=1.19, 95% CI: 1.07-1.32) compared with Italian cases, also showing a higher probability to die from the infection in those from low-HDI countries (Adj. RR=1.32, 95% CI: 1.01-1.75) [although this difference was not observed among hospitalized cases]. We observed an inverse gradient by which the risk of hospitalization, admission to ICU and death increased as the HDI of the country of origin decreased. | In conclusion, our results suggest that, compared to Italian cases, non-Italian cases are more likely to experience a delayed access to health services. Accessing care when the disease is more advanced and clinical conditions possibly more severe can explain why it is more likely for non-Italian nationals to require hospitalization and admission to ICU. Compared to Italian cases, differences in clinical outcomes appear more pronounced in non-Italian cases from countries with lower HDI and reduced in those from high-HDI countries. | high   |
| Brinkmann et al. 2021     | Germany                                       | HIC | June 2020 to February 2021          | International migrants      | health outcomes of disease: SARS-CoV-2 cases                        | Cohort study                        | (...) the incidence of SARS-CoV-2 infections is significantly higher in families of Turkish (OR 6.24 [1.38-28.13], p=0.017) or Middle Eastern (OR 6.44 [1.14- 36.45], p=0.035) decent independent of other risk factors i.e. after adjustment for other socioeconomic confounders.                                                                                                                                                                                                                                                                                                                                     | This study shows that poor socio-economic status and Turkish or Middle Eastern migration background are independent risk factors for SARS-CoV-2 infection in a population-based cohort of children and adolescents in Germany.                                                                                                                                                                                                                                                                                                                          | medium |
| Guijarro et al. 2021      | Spain                                         | HIC | February 1, 2020 to                 | International migrants      | health outcomes of disease:                                         | Cohort study                        | The crude cumulative incidence among migrants (n=20419) was higher than among Spaniards (n=131599): 8.81 and 6.51 and per 1000 inhabitants,                                                                                                                                                                                                                                                                                                                                                                                                                                                                            | Our data suggest ethnic background may play a role in risk for COVID-19. Migrants from some areas of                                                                                                                                                                                                                                                                                                                                                                                                                                                    | high   |

|                      |         |     |                                      |                        |                                                                                               |                       |                                                                                                                                                                                                                                                                                                                                                                                                                                                                                                                                                                                              |                                                                                                                                                                                                                                                                                                                                                                                                                                                                          |        |
|----------------------|---------|-----|--------------------------------------|------------------------|-----------------------------------------------------------------------------------------------|-----------------------|----------------------------------------------------------------------------------------------------------------------------------------------------------------------------------------------------------------------------------------------------------------------------------------------------------------------------------------------------------------------------------------------------------------------------------------------------------------------------------------------------------------------------------------------------------------------------------------------|--------------------------------------------------------------------------------------------------------------------------------------------------------------------------------------------------------------------------------------------------------------------------------------------------------------------------------------------------------------------------------------------------------------------------------------------------------------------------|--------|
|                      |         |     | April 25, 2020                       |                        | SARS-CoV-2 cases                                                                              |                       | respectively ( $p < 0.001$ ), but differed by region of origin.                                                                                                                                                                                                                                                                                                                                                                                                                                                                                                                              | the world may merit closer attention for both clinical and epidemiological reasons.                                                                                                                                                                                                                                                                                                                                                                                      |        |
| Hamadah et al. 2020  | Kuwait  | HIC | February 24, 2020 to April 20, 2020  | International migrants | health outcomes of disease: ICU admission Mortality                                           | Cross-Sectional Study | We found non-Kuwaitis were two times more likely to be admitted to the ICU (OR: 1.92, 95% CI 0.86-4.72) or die (OR: 2.19, 95% CI 0.88-6.02) from COVID-19. With adjustment to age, smoking and certain co-morbidities, non-Kuwaitis had two- and three-fold increase in odds ratios for ICU admission and death, respectively.                                                                                                                                                                                                                                                               | The current pandemic could amplify societal and structural inequalities that have long existed in the public health realm. The data on the differences of COVID-19 outcomes among marginalized subpopulations is now growing. In Kuwait we found non-Kuwaitis to be two times more likely to be admitted to the ICU or die from COVID-19.                                                                                                                                | high   |
| Harkness et al. 2021 | USA     | HIC | February 18, 2020 to August 26, 2020 | International migrants | health outcomes of disease: SARS-CoV-2 cases<br><br>Other: Effect of lockdown measures        | Cross-Sectional Study | Despite no difference in COVID-19 testing rates, established immigrants were 4.52 times more likely (95% CI: 1.60, 12.81) to report a COVID-19 diagnosis than US-born LSMM. Immigrants, compared to US-born LSMM, reported disproportionate financial stress during COVID-19. Recent immigrants were 2.75 times more likely than US-born LSMM to report financial loss (CI: 1.30, 5.82) and established immigrants trended in the same direction.                                                                                                                                            | Not reported.                                                                                                                                                                                                                                                                                                                                                                                                                                                            | medium |
| Holmberg et al. 2022 | Finland | HIC | February 27, 2020 to August 3, 2020  | International migrants | health outcomes of disease: SARS-CoV-2 cases<br>Hospitalisation<br>ICU admission<br>Mortality | Cohort study          | In total, 124 240 individuals were tested, and among the 118 300 (95%) whose first language could be determined, 4005 (3.4%) were COVID-19-positive, 623 (0.5%) were admitted to specialized hospitals, and 147 (0.1%) were admitted to the ICU; 254 (0.2%) died. Those with a foreign first language had lower testing rates (348, 95%CI 340-355 versus 758, 95%CI 753-762 per 10 000, $p < 0.0001$ ), higher incidence (36, 95%CI 33-38 versus 22, 95%CI 21-23 per 10 000, $p < 0.0001$ ), and higher positivity rates (103, 95%CI 96-109 versus 29, 95%CI 28-30 per 1000, $p < 0.0001$ ). | The population with a foreign first language was at an increased risk for testing positive for SARS-CoV-2, but when hospitalized they had outcomes similar to those in the native, domestic language population. This suggests that special attention should be paid to the prevention and control of infectious diseases among language minorities.                                                                                                                     | high   |
| Horner et al. 2021   | USA     | HIC | January 1, 2020 to December 31, 2020 | International migrants | health outcomes of disease: Mortality                                                         | Cross-Sectional Study | Foreign-born Minnesotans died of COVID-19 at twice the age- and gender-adjusted rate of the US-born (age-gender standardized mortality per 100,000:261.4 vs. 1290.7; difference=101.5%).                                                                                                                                                                                                                                                                                                                                                                                                     | Disparities by race and ethnicity within US-born populations are profound, but so too are the disparities across US- and foreign-born groups. (...) The peaks in COVID-19 mortality at the end of 2020 and within long-term care facilities overshadow the experience of immigrant communities - which faced high early mortality rates and significant losses among those living outside long term care.                                                                | high   |
| Indseth et al. 2021  | Norway  | HIC | March 1, 2020 to October 18, 2020    | International migrants | health outcomes of disease: SARS-CoV-2 cases<br>Hospitalisation<br>Mortality                  | Cross-Sectional Study | Immigrants had higher rates of notified COVID-19 (n per 100,000 = 567 vs.251) and related hospitalizations (n per 100,00 = 62 vs. 21) than non-immigrants. (...) if we adjust for age, the immigrants from AfAsSA have substantially higher mortality rates than non-immigrants. For some immigrant groups, there is a high number of hospitalizations per notified case. Moreover, we also reported a high age-adjusted rate of COVID-19-related mortality among                                                                                                                            | After the first weeks of the pandemic, immigrants in Norway have had higher rates than Norwegian-born residents of notified COVID-19 infections and related hospitalization, but with major differences across immigrant groups. (...) The relationship between notified infections and hospitalizations could indicate a higher level of unconfirmed cases in some groups. The much higher toll of notified COVID-19 infections among several immigrant groups compared | high   |

|                             |        |      |                                    |                        |                                                     |                        |                                                                                                                                                                                                                                                                                                                                                                                                                                                                                                                                                     |                                                                                                                                                                                                                                                                                                                                                                                                                                                                                                                                        |        |
|-----------------------------|--------|------|------------------------------------|------------------------|-----------------------------------------------------|------------------------|-----------------------------------------------------------------------------------------------------------------------------------------------------------------------------------------------------------------------------------------------------------------------------------------------------------------------------------------------------------------------------------------------------------------------------------------------------------------------------------------------------------------------------------------------------|----------------------------------------------------------------------------------------------------------------------------------------------------------------------------------------------------------------------------------------------------------------------------------------------------------------------------------------------------------------------------------------------------------------------------------------------------------------------------------------------------------------------------------------|--------|
|                             |        |      |                                    |                        |                                                     |                        | immigrants from Asia Africa and Latin America, corresponding to groups with high rates of hospitalizations.                                                                                                                                                                                                                                                                                                                                                                                                                                         | to non-immigrants suggests a need for actions such as enhancing community engagement and health communication strategies to lower the thresholds for being tested.                                                                                                                                                                                                                                                                                                                                                                     |        |
| Ingraham et al. 2021        | USA    | HIC  | March 4, 2020 to August 19, 2020   | International migrants | health outcomes of disease: Hospitalisation         | Cohort study           | Hospitalized patients were older (60.9 vs. 40.4 years, $p < 0.001$ ) and more likely to be male ( $n = 425$ [49.1%] vs. 2049 [43.5%], $p = 0.002$ ). Of those requiring hospitalization, 43.9% ( $n = 381$ ), 19.9% ( $n = 172$ ), 18.6% ( $n = 161$ ), and 11.8% ( $n = 102$ ) were White, Black, Asian, and Hispanic, respectively. Non-English-speaking (OR 1.91, 95% CI 1.51-2.43) significantly increased odds of hospital admission across and within minority groups.                                                                        | Our findings highlight areas of neighbourhood-level deprivation may contribute to racial disparities but to a lesser degree when controlling individual-level factors. Strikingly, racial and ethnic disparities in COVID-19 illness severity exist, independent of socioeconomic characteristics, which supports the need to investigate the different levels of racism contributing to health inequity.                                                                                                                              | high   |
| Johnson-Agbakwu et al. 2021 | USA    | HIC  | May 6, 2020 to July 22, 2020       | Refugees               | health outcomes of disease SARS-CoV-2 cases         | Cross-Sectional Study  | When refugee status was determined, 45 women (12.8%) were identified as refugees. Of the 45 refugee women, 8 (17.8%) tested positive for severe acute respiratory syndrome 2 compared with 25 non-refugee patients (8.19%) who tested positive for severe acute respiratory syndrome 2 (prevalence ratio, 2.16; 95% confidence interval, 1.04-4.51). In addition, 7 of the refugee women who tested positive for severe acute respiratory syndrome coronavirus 2 were from Central Africa.                                                          | Universal testing for SARS-CoV-2 on maternity units in these systems provides the opportunity to identify asymptomatic yet high-risk patient populations in need of targeted interventions to mitigate the spread of infection and facilitate a timely, culturally, and linguistically enhanced public health response. (...) Universal maternity testing is 1 step toward achieving health equity among vulnerable, otherwise hidden, communities.                                                                                    | medium |
| Kalani et al. 2021          | Iran   | LMIC | January 2020 to December 2020      | Refugees               | health outcomes of disease: ICU admission Mortality | Case-Control Study     | In this study 132 Afghan refugees were compared to 266 Iranian controls. (...) There was no difference in probability of being evaluated by HRCT or receiving ICU treatment ( $p = 0.173$ , 1, respectively) even after being adjusted for symptoms or co-morbidities that were manifesting differently between Afghan vs. Iranian patients ( $p = 0.476$ , 0.881, respectively). Ten (7.57%) subjects died in case group and 18 (6.76) in control group. There wasn't any significant difference in death rate between the groups ( $P = 0.766$ ). | Our research found significant variations in clinical characteristics between Afghan and Iranian COVID-19 patients, but these differences have little bearing on the likelihood of getting adequate medical treatment. Jahrom City was an example of COVID-19 health care equity for ethnic minorities.                                                                                                                                                                                                                                | high   |
| Kjøllesdal & Magnusson 2021 | Norway | HIC  | April 1, 2020 to December 2, 2020  | International migrants | health outcomes of disease: SARS-Cov-2 cases        | Cross-Sectional Study  | Within each occupational group, immigrants had a greatly increased odds of COVID-19 when compared with Norwegian-born (odds ratio [OR] ~ 1.66–12.72). However, immigrants working in the selected occupations had the same odds of COVID-19 as person with same birth country not having the same occupation (OR ~ 1). Exceptions were Somalian, Afghani and Iraqi personal care workers in health services who had an increased odds of COVID-19 compared with others from the same country.                                                       | Immigrants from Somalia, Pakistan, Iraq, Afghanistan and Turkey holding various occupations implying close contact with others did not have higher odds of notified infection than others with the same country of birth, except for health care workers. Thus, occupation did not seem to play an important role in the excess risk of COVID-19 infection among immigrants. Explanations for the high rate of infection is likely related to a complex set of factors including factors related to exposure and to underlying health. | high   |
| Kjøllesdal et al. 2021      | Norway | HIC  | March 1, 2020 to November 15, 2020 | International migrants | health outcomes of disease: SARS-Cov-2 cases        | Cross-Sectional Study; | The SES of immigrants at the group level was related to rates of notified infections and related hospitalisations. There was a strong correlation [pearson correlation index] between notified                                                                                                                                                                                                                                                                                                                                                      | Crowded housing was correlated with both COVID-19 infections and related hospitalisations. Further, low income, low education and unemployment at the group level were moderately correlated with rates of                                                                                                                                                                                                                                                                                                                             | high   |

|                       |        |     |                                        |                             |                                                              |                       |                                                                                                                                                                                                                                                                                                                                                                                                                                                                                                                                                                                                                                                                   |                                                                                                                                                                                                                                                                                                                                                                                                                                                                                                                                                                                                                                                                                                                                         |        |
|-----------------------|--------|-----|----------------------------------------|-----------------------------|--------------------------------------------------------------|-----------------------|-------------------------------------------------------------------------------------------------------------------------------------------------------------------------------------------------------------------------------------------------------------------------------------------------------------------------------------------------------------------------------------------------------------------------------------------------------------------------------------------------------------------------------------------------------------------------------------------------------------------------------------------------------------------|-----------------------------------------------------------------------------------------------------------------------------------------------------------------------------------------------------------------------------------------------------------------------------------------------------------------------------------------------------------------------------------------------------------------------------------------------------------------------------------------------------------------------------------------------------------------------------------------------------------------------------------------------------------------------------------------------------------------------------------------|--------|
|                       |        |     |                                        |                             | ICU admission                                                | Ecologic study        | infections [per 100,000] and crowded housing ( $R=0.77$ ; $p<0.01$ ), whereas the correlations between notified infections and income ( $R=-0.52$ ; $p<0.05$ ), unemployment $R=0.43$ ; $p<0.05$ ) and education ( $R=-0.47$ ; $p<0.05$ ) were moderate.                                                                                                                                                                                                                                                                                                                                                                                                          | COVID-19 infections. Other characteristics of immigrant groups with disadvantaged socioeconomic position may be equally important for high rates of COVID-19. Regardless of the cause of infections, these groups are important to target with preventive measures. In particular, targeted interventions should be directed to low-income families living in overcrowded households.                                                                                                                                                                                                                                                                                                                                                   |        |
| Kondilis et al. 2021  | Greece | HIC | February 26, 2020 to November 15, 2020 | Asylum Seekers and Refugees | health outcomes of disease: SARS-Cov-2 cases                 | Cross-Sectional Study | Twenty-five COVID-19 outbreaks were identified in refugee and asylum seeker reception facilities, with 6 (85.7%) of 7 RICs and 18 (56.3%) of 32 RSs reporting at least one outbreak during the study period. The overall 9-month COVID-19 IP among refugee and asylum seeker populations residing in RSs on the Greek mainland was 1758 cases per 100,000 population; in RICs the incidence was 2052 cases per 100,000 population. Compared to the general population the risk of COVID-19 infection among refugees and asylum seekers in reception facilities was 2.5 to 3 times higher ( $p$ -value $<0.001$ ).                                                 | Our data quantitatively shows the greater risk of COVID-19 infection among refugee and asylum seeker populations residing in sub-standard living conditions. Acknowledging this higher risk is of crucial policy importance. Going forward, all enclosed population groups need to be urgently included and prioritized in the national vaccination program, without any exception. (...) Greek authorities should concurrently urgently focus on improving living conditions in these facilities, decongesting those that operate beyond their capacity, reinforcing epidemiological surveillance, testing strategies and data transparency, and ensuring free, comprehensive and universal access to care without any discrimination. | high   |
| Labberton et al. 2021 | Norway | HIC | June 15, 2020 to March 31 2021         | International migrants      | health outcomes of disease: SARS-Cov-2 cases Hospitalisation | Cross-Sectional Study | Confirmed infections in this period (per 100000): foreign-born 3140, Norwegian-born with foreign-born parents 4799, Norwegian-born with Norwegian-born parent(s) 1011. Hospitalizations (per 100000): foreign-born 147, Norwegian-born with foreign-born parents 47, Norwegian-born with Norwegian-born parent(s) 37. The addition of socioeconomic and medical factors to the base-model (age, sex, municipality of residence) attenuated excess infection rates by 12.0% and hospitalizations by 3.8% among foreign-born, and 10.9% and 46.2% respectively among Norwegian-born with foreign parents, compared to Norwegian-born with Norwegian-born parent(s). | Residents with foreign backgrounds have, as a group, been disproportionately hit by COVID-19 in Norway. Adjustment for socioeconomic factors and medical risk attenuates the over-representation moderately; however, the overall picture remains the same. The data available or variable definitions may not have fully captured the effects and interactions of these factors, and future studies should aim to unravel this further.                                                                                                                                                                                                                                                                                                | high   |
| Lombardi et al. 2021  | Italy  | HIC | April 7, 2020 to June 12, 2020         | International migrants      | health outcomes of disease: SARS-Cov-2 cases                 | Cross-Sectional Study | The highest rates of seroprevalence were detected among foreign-born workers [14.5%; OR (ref. Italian-born) = 1.82 (1.07 to 3.06)] [...]. SARS-CoV-2 sero-prevalence of frontline HCWs did not differ from those who did not report direct contact with patients with COVID-19.                                                                                                                                                                                                                                                                                                                                                                                   | What is suggested by our study, and by those similarly performed in the same area in the context of the ongoing pandemic, is that the observed seroprevalence rate reflects the spread of infection in the community served by the hospital. Assuming that PPE is provided and correctly employed by all HCWs, hospitals do not seem to act as an epicentre of the infection.                                                                                                                                                                                                                                                                                                                                                           | high   |
| Lusk & Chandra 2021   | USA    | HIC | March 1, 2020 to                       | Migrant workers             | health outcomes of disease: mortality                        | Ecologic study        | In the 13-month period since the start of the pandemic (from March 1, 2020 to March 31, 2021), the estimated cumulative number of COVID-19 cases                                                                                                                                                                                                                                                                                                                                                                                                                                                                                                                  | Results suggest counties that employ more agricultural workers, particularly hired and migrant workers, are at greater risk for COVID-19, findings                                                                                                                                                                                                                                                                                                                                                                                                                                                                                                                                                                                      | medium |

|                            |        |     |                                 |                        |                                                                        |                       |                                                                                                                                                                                                                                                                                                                                                                                                                                                                                                                                                                          |                                                                                                                                                                                                                                                                                                                                                                                                                                                                                                                                                                                                                                                 |        |
|----------------------------|--------|-----|---------------------------------|------------------------|------------------------------------------------------------------------|-----------------------|--------------------------------------------------------------------------------------------------------------------------------------------------------------------------------------------------------------------------------------------------------------------------------------------------------------------------------------------------------------------------------------------------------------------------------------------------------------------------------------------------------------------------------------------------------------------------|-------------------------------------------------------------------------------------------------------------------------------------------------------------------------------------------------------------------------------------------------------------------------------------------------------------------------------------------------------------------------------------------------------------------------------------------------------------------------------------------------------------------------------------------------------------------------------------------------------------------------------------------------|--------|
|                            |        |     | March 31, 2021                  |                        |                                                                        |                       | (deaths) was 329,031 (6,166) among agricultural producers, 170,137 (2,969) among hired agricultural workers, 202,902 (3,812) among unpaid agricultural workers, and 27,223 (459) among migrant agricultural workers. The cases amount to 9.55%, 9.31%, 9.39%, and 9.01% of all U.S. agricultural producers, hired workers, unpaid workers, and migrant workers, respectively.                                                                                                                                                                                            | which suggest these groups are at heightened risk from COVID-19. In addition to the disease risks, hired and migrant agricultural workers represent populations that tend to have toward lower incomes, greater job insecurity, and more perilous immigration and legal status than the general population, which suggest additional relative financial risks resulting from the burden of medical costs or lost time away from work. Beyond the immediate impact on agricultural workers, this research also shows that reductions in agricultural labor have the potential to adversely affect food supply.                                   |        |
| Mallet et al. 2021         | France | HIC | May 2020                        | International migrants | health outcomes of disease: SARS-Cov-2 cases                           | Cross-Sectional Study | Of the 1347 workers, 87.5% were tested: 140 cases were identified; 4 were hospitalised, including 2 admitted to intensive care. In the company, the cluster remained limited to deboning and cutting activities. The attack rate was 11.9% in the company, reaching 16.6% in the cutting department. (...) In the cutting department, an association with virus infection was found for a group of non-French speaking workers from the same Eastern European country (RR=2.67 [1.76–4.05]). They shared accommodation or carpoled more frequently than the other cases. | In conclusion, the investigation of the outbreak revealed a significantly increased risk of SARS-CoV-2 infection for workers of subcontractors and some foreign-born workers. (...) Particular attention must now be paid to their ability to appropriate and implement the COVID-19 risk management measures in terms of vaccination, early detection of symptoms, barrier gestures and distancing measures. Information and prevention messages must therefore be translated into the language of the workers. Messages must take into account the risks of contamination in the workplace, as well as in peri-professional and private life. | high   |
| Marco et al. 2021          | Spain  | HIC | 28 days (not further specified) | International migrants | health outcomes of disease: SARS-Cov-2 cases<br><br>Other: vaccination | Cross-Sectional Study | Forty-eight (25.9%) infections by the SCV-B.1.17 variant were recorded in prisoners and none in staff. Infection rates were higher in younger prisoners, immigrants, and those admitted $\geq 7$ days previously. In all, 22.6% of vaccinated subjects were infected vs. 29.3% of unvaccinated. Vaccine effectiveness was 23%.                                                                                                                                                                                                                                           | In a prison outbreak, a dose of AVChAdOx1 administered 21-23 days earlier did not significantly prevent the occurrence of infections, but did reduce the duration of rt-PCR positivity.                                                                                                                                                                                                                                                                                                                                                                                                                                                         | medium |
| Martin-Sanchez et al. 2021 | Spain  | HIC | March 1, 2020 to April 15, 2020 | International migrants | health outcomes of disease: ICU admissions<br>Mortality                | Cohort study          | We included 10,110 COVID-19 patients admitted to 18 Spanish hospitals (median age 68 (IQR 54-80) years old; 44.5% female; 14.8% were not born in Spain). Among these, 779 (7.7%) cases were admitted to critical care units and 1678 (16.6%) patients died during the hospitalization.                                                                                                                                                                                                                                                                                   | Social determinants such as residence in low-income areas and being born in Latin American countries were associated with increased odds of being admitted to an intensive care unit and of in-hospital mortality. There was considerable variation in outcomes between different Spanish centres.                                                                                                                                                                                                                                                                                                                                              | high   |
| Mema et al. 2021           | Canada | HIC | March 28, 2020 to May 10, 2020  | Migrant workers        | health outcomes of disease: SARS-CoV-2 cases                           | Cohort study          | A total of 26 COVID-19 cases were identified among the group of TFWs [temporary foreign workers]; no cases were identified among local workers. Cases were primarily male (77%) with a median age of 41 years. Symptom onsets ranged from March 8 to April 9, 2020. One case required overnight hospitalization for pneumonia.                                                                                                                                                                                                                                           | TFWs have had unique risks during the COVID-19 pandemic as demonstrated by this outbreak, which occurred in an agricultural setting in BC. (...) Immediate quarantine of affected workers, comprehensive follow-up of cases and contacts, and mobilization of an outreach team were effective strategies to manage and control this outbreak. (...) Provincial and federal orders and guidance have since been developed to reduce outbreak risk in agricultural settings and to protect the health and safety of both                                                                                                                          | medium |

|                    |                      |     |                                    |                        |                                                                              |                       |                                                                                                                                                                                                                                                                                                                                                                                                                                                                                                                                                                                                                            |                                                                                                                                                                                                                                                                                                                                                                                                                                                                                                                                                                                                 |        |
|--------------------|----------------------|-----|------------------------------------|------------------------|------------------------------------------------------------------------------|-----------------------|----------------------------------------------------------------------------------------------------------------------------------------------------------------------------------------------------------------------------------------------------------------------------------------------------------------------------------------------------------------------------------------------------------------------------------------------------------------------------------------------------------------------------------------------------------------------------------------------------------------------------|-------------------------------------------------------------------------------------------------------------------------------------------------------------------------------------------------------------------------------------------------------------------------------------------------------------------------------------------------------------------------------------------------------------------------------------------------------------------------------------------------------------------------------------------------------------------------------------------------|--------|
|                    |                      |     |                                    |                        |                                                                              |                       |                                                                                                                                                                                                                                                                                                                                                                                                                                                                                                                                                                                                                            | workers and Canadians in the context of the pandemic.                                                                                                                                                                                                                                                                                                                                                                                                                                                                                                                                           |        |
| Methi et al. 2021  | Norway               | HIC | August 1, 2020 to May 1, 2021      | International migrants | health outcomes of disease: SARS-CoV-2 cases<br>Hospitalisation<br>Mortality | Cohort study          | Among all multiperson households in Norway (n=1 422 411), at least one member had been infected in 3.7% of the 343 017 immigrant households and 1.4% in the 1 079 394 households with only Norwegian-born members. (...) The share of households with at least one member hospitalised or dead from COVID-19 was higher in immigrant (0.4% households with hospitalised member, 0.02% households with dead member) than Norwegian-born households (0.1 %, 0.01%). Households from West Asia were among the most severely hit, with 1.1% having at least one member hospitalised and 0.06% having at least one dead member. | SARS-CoV-2 is more frequently introduced into multiperson immigrant households than into households with only Norwegian-born members, and transmission within the household occurs more frequently in immigrant households. The results are likely related to living conditions, family composition or differences in social interaction, emphasising the need to prevent introduction of SARS-CoV-2 into these vulnerable households.                                                                                                                                                          | high   |
| Nair et al. 2021   | United Arab Emirates | HIC | March 1, 2020 to June 30, 2020     | International migrants | health outcomes of disease: Mortality                                        | Cross-Sectional Study | From, the total of 3072 patients, less than one-fifth were females; the Asian population (71.2%); followed by Middle Eastern Arabs (23.3%) were the most infected by the virus. (...) Kidney disease as comorbidity significantly diminished the survival rates (...) Similarly, the higher age of patients between 51 and 65 years, significantly decreased the odds for survival (...) (Adjusted OR 12.3 95% CI (2.9 – 52.4), p<0.001).                                                                                                                                                                                  | Our study indicates that older ages above 51 years and kidney disease increased mortality significantly in COVID-19 patients. Ethnicity was not significantly associated with mortality in the UAE population. Our findings are important in the management of the COVID-19 disease in the region with similar economic, social, cultural, and ethnic backgrounds.                                                                                                                                                                                                                              | high   |
| Ngiam et al. 2020  | Singapore            | HIC | February 2020 to April 2020        | Migrant workers        | health outcomes of disease: SARS-CoV-2 cases<br>ICU admission<br>Mortality   | Cross-Sectional Study | Local cases acquired outside the dormitories were older compared with imported or migrant worker cases median age in years: 46±16 vs 39±15 vs 35±9, respectively; p < 0.001). (...) A total of 49% and 57% of local non-dormitory and imported cases were of Chinese ethnicity, respectively, and 77% of migrant workers were Indian or Bangladeshi. (...) There were two deaths, both in local non-dormitory cases (...).                                                                                                                                                                                                 | Singapore experienced a substantial shift in the population at risk of severe COVID-19. Successful control in the community protected an aging population. Large migrant worker dormitory outbreaks occurred, but the disease incurred was less severe, resulting in Singapore having one of the lowest case fatality rates in the world.                                                                                                                                                                                                                                                       | high   |
| Norman et al. 2020 | Spain                | HIC | March 2020 to May 2020             | International migrants | health outcomes of disease: ICU admission<br>Mortality                       | Cross-Sectional Study | In-hospital mortality overall was higher in Europeans (443/1956, 22.7%) than in non-Europeans (40/389, 10.3%) (p<0.001), but there were no significant differences when adjusted for age/gender (OR 1.27, 95%CI 0.86e1.88). Non-Europeans were more frequently admitted to ICU (71/389, 18.3%) compared with Europeans (187/1956, 9.6%) (p<0.001) and a difference in ICU admission rate was also found when adjusted for age/ gender (OR 1.43, 95% CI 1.03e1.98).                                                                                                                                                         | No significant differences regarding in-hospital mortality (when adjusted for age and gender) were observed between Europeans and non-Europeans (mainly Latin Americans), although an increased rate of ICU admission in non-Europeans was found. Differences between ethnicity and COVID-19 outcome found in other studies may be the result of a higher burden of adverse socio-economic factors in certain populations. Investigation of genetic and immunological markers in patients of different geographical origin should aid the understanding of determinants of outcome in COVID-19. | high   |
| Otto et al. 2021   | USA                  | HIC | March 1, 2020 to February 28, 2021 | International migrants | health outcomes of disease: SARS-CoV-2 cases                                 | Ecologic study        | A total of 10,138 patients were tested for SARS-CoV-2, with 1,284 (12.7%) being positive. Test positivity was higher for Spanish-speaking families than for English-speaking families (22.5% versus                                                                                                                                                                                                                                                                                                                                                                                                                        | In conclusion, this is the first report examining the impact of family-preferred language on SARS-CoV-2 infection in children. We identified disproportionately elevated SARS-CoV-2 test positivity                                                                                                                                                                                                                                                                                                                                                                                             | medium |



|                              |        |     |                                        |                        |                                                                                 |                       |                                                                                                                                                                                                                                                                                                                                                                                                                                                                                                                                                                                                      |                                                                                                                                                                                                                                                                                                                                                                                                                                                                                                                                                                                                                                                                                                                                              |      |
|------------------------------|--------|-----|----------------------------------------|------------------------|---------------------------------------------------------------------------------|-----------------------|------------------------------------------------------------------------------------------------------------------------------------------------------------------------------------------------------------------------------------------------------------------------------------------------------------------------------------------------------------------------------------------------------------------------------------------------------------------------------------------------------------------------------------------------------------------------------------------------------|----------------------------------------------------------------------------------------------------------------------------------------------------------------------------------------------------------------------------------------------------------------------------------------------------------------------------------------------------------------------------------------------------------------------------------------------------------------------------------------------------------------------------------------------------------------------------------------------------------------------------------------------------------------------------------------------------------------------------------------------|------|
|                              |        |     |                                        |                        |                                                                                 |                       | 12.3%). (...) At the peak of the first wave of the pandemic, the adjusted odd ratio for test positivity was 3.76 (95% CI, 2.07-6.67) for families with a preferred language other than English compared with English-speaking families.                                                                                                                                                                                                                                                                                                                                                              | in children from families with a preferred language other than English, which is consistent with reported findings in adults in the United States and other English-speaking nations. As we continue to track and address the disproportionate impact of the SARS-CoV-2 pandemic on historically underrepresented and marginalized communities across the globe, it will be important to track disparities experienced by communities who speak languages other than English.                                                                                                                                                                                                                                                                |      |
| Pagani et al. 2021           | Italy  | HIC | December 23, 2020 to February 19, 2021 | International migrants | health outcomes of disease: SARS-CoV-2 cases                                    | Cross-Sectional Study | Our findings indicate that the prevalence of SARS-CoV-2 infection in the study population as a whole was 12.4%, but it was higher among non-Italians when compared to Italians (23.3% vs. 9.1%). Moreover, being non-Italian seemed to be independently associated with a higher prevalence of SARS-CoV-2, even after adjusting for other potential social determinants.                                                                                                                                                                                                                             | In conclusion, our findings suggest that non-Italians in Italy are more frequently infected with SARS-CoV-2 than Italians. Although a lower educational level, a lower socio-economic status, and the experience of crowded housing were each independently associated with a higher prevalence of SARS-CoV-2, it is possible that the association between non-Italians and COVID-19 may also be due to other social and cultural determinants that were not appropriately investigated in our questionnaire.                                                                                                                                                                                                                                | high |
| Rostila et al. 2021          | Sweden | HIC | January 31, 2020 to May 4, 2020        | International migrants | health outcomes of disease: Mortality<br><br>Other: effect of lockdown measures | Cohort study          | Migrants from Middle Eastern countries (relative risk (RR)=3.2, 95% confidence interval (CI): 2.6, 3.8), Africa (RR=3.0, 95% CI: 2.2, 4.3), and non-Sweden Nordic countries (RR=1.5, 95% CI: 1.2, 1.8) had higher mortality from COVID-19 than persons born in Sweden. Especially high mortality risks from COVID-19 were found among persons born in Somalia, Lebanon, Syria, Turkey, Iran, and Iraq. Socioeconomic status, number of working-age household members, and neighborhood population density attenuated up to half of the increased COVID-19 mortality risks among the foreign-born.    | In this total population study, we found large disparities in COVID-19 mortality by country of birth in Stockholm-the worst-affected area in Sweden and one of the most affected regions in the world. Migrants' disadvantaged socio-economic and living conditions explained a considerable share of their higher COVID-19 mortality risk. Policies aiming to reduce disparities in COVID-19 mortality by ethnicity/ country of birth should consider such conditions when designing health interventions. However, it is crucial to continue to study risk factors explaining migrants' higher prevalence of COVID-19 deaths in order to prevent such disparities in both Sweden and other countries with substantial migrant populations. | high |
| Sempere-Gonzalez et al. 2021 | Spain  | HIC | March 1, 2020 to April 30, 2020        | International migrants | health outcomes of disease: Hospitalisation ICU admission                       | Cohort Study          | Latin American patients (n=142) had a higher proportion of anosmia, rhinorrhea and odynophagia, as well as higher mean levels of platelets and lower mean levels of ferritin than Spanish patients. No differences were found in oxygen requirement and mortality at 28 days after admission, but there was a higher proportion of ICU admissions (28.2% vs. 20.2%, p= 0.0310). An increased proportion of ICU admissions were found in patients from Latin America compared with native Spanish patients when adjusted by age and gender, with no significant differences in in-hospital mortality. | In summary, we observed an increased rate of ICU admissions among hospitalized adult patients with COVID-19 pneumonia from Latin America compared with native Spanish patients. Furthermore, there was a higher rate of arthromyalgia, cacosmia and anosmia observed in patients from Latin America. These differences could be explained by socio-economic factors or still unknown genetic factors, so further investigations are needed. Understanding ethnic disparities can help so as to create health prevention strategies.                                                                                                                                                                                                          | high |

|                        |                  |     |                                        |                                                                            |                                                                                        |                                               |                                                                                                                                                                                                                                                                                                                                                                                                                                                                                                                                                                                                                                                                                                             |                                                                                                                                                                                                                                                                                                                                                                                                                                                                                                                                                                                                                                              |        |
|------------------------|------------------|-----|----------------------------------------|----------------------------------------------------------------------------|----------------------------------------------------------------------------------------|-----------------------------------------------|-------------------------------------------------------------------------------------------------------------------------------------------------------------------------------------------------------------------------------------------------------------------------------------------------------------------------------------------------------------------------------------------------------------------------------------------------------------------------------------------------------------------------------------------------------------------------------------------------------------------------------------------------------------------------------------------------------------|----------------------------------------------------------------------------------------------------------------------------------------------------------------------------------------------------------------------------------------------------------------------------------------------------------------------------------------------------------------------------------------------------------------------------------------------------------------------------------------------------------------------------------------------------------------------------------------------------------------------------------------------|--------|
| Vosko & Spring 2021    | Canada           | HIC | 2020-2021 (not specified)              | Migrant workers                                                            | health outcomes of disease: SARS-CoV-2 cases<br><br>Other: effect of lockdown measures | Mixed-Methods: Primarily Qualitative Research | Although estimates vary by source, over 1000 migrant farmworkers in Ontario tested positive for COVID-19 between April and July 2020. Thus, while Ontario documented 36594 cases by July 2020 (i.e. 250 per 100000) (...), the rate of infection among migrant farmworkers, 20,015 of whom entered Ontario during the spring and summer growing season, was approximately 4996 cases per 100000 people. (...) The magnitude of illness among migrant farmworkers in Southern Ontario, and Canada more broadly, reflects the emphasis, deeply ingrained in programs emblematic of migration management such as the SAWP, on keeping labour costs low in the interest of protecting the national food supply. | Taking Southern Ontario as its focus, this article reveals how the federal government response to COVID-19 in agriculture perpetuated the effects of longstanding laws and policies requiring migrant farmworkers, circumscribed in their ability to politically mobilize on account of their institutionalized deportability, to shoulder disproportionate amounts of economic, social, and health risks. Centering the transnational character of migrant farmworkers' renewal, it identifies meaningful interventions to limit the structural disempowerment of migrant farmworkers and the externalization of their social reproduction. | medium |
| Warszawski et al. 2022 | France           | HIC | May 2020 to November 2020              | International migrants                                                     | health outcomes of disease: SARS-CoV-2 cases                                           | Cohort Study                                  | In May 2020, prevalence was significantly higher among immigrants born outside Europe (9.2% compared to 5.9% among second-generation immigrants from outside Europe, and 4.1% in the French-born population), but the increased risk disappeared after adjustment for living condition. In contrast, in November 2020, seroprevalence was higher in both first (13.3%) and second (14.4%) generation immigrants from outside Europe, compared to 5.3% among French-born and 6.0% among European immigrants, and they remained at higher risk even after adjustment for living conditions (adjusted odds ratio respectively: 2.1 [1.7–2.8] and 2.2 [1.8–2.9])                                                | The role of living conditions on the risk of SARS-CoV-2 infection decreased between the first and second epidemic waves, possibly partly due to the widespread availability of masks and virological tests at population level. Nevertheless, in November 2020, in a context of less restricted social contacts than during the first lockdown, seroprevalence remained higher among healthcare professionals than among other professionals, and strongly increased among young people and racial minorities. These populations need special attention, especially for adherence to vaccination policies.                                   | high   |
| Wiedmeyer et al. 2021  | British Columbia | HIC | January 1, 2020 to July, 31 2021       | International migrants (including international students), Migrant workers | health outcomes of disease: SARS-CoV-2 cases<br><br>Other: health services access      | Cross-Sectional Study                         | 4.9% of people with temporary immigration status had a positive test for SARS-CoV-2 over this period, compared to 4.0% among people with permanent residency and 2.1% among people who hold Canadian citizenship. This pattern is persistent by sex/gender, age group, neighborhood income quintile, health authority, and in both metropolitan and small urban settings. At the same time we observe lower access to testing and COVID-19 related primary care among people with temporary status.                                                                                                                                                                                                         | People with temporary immigration status in BC experience higher SARS-CoV-2 test positivity and lower access to testing and primary care. Interwoven immigration, health and occupational policies place people in circumstances of higher health risk and will continue to amplify harms of the COVID pandemic unless all levels of government take responsibility. Extending permanent residency status to all immigrants residing in Canada and decoupling access to health care from immigration status are policies that could reduce precarity due to temporary immigration status.                                                    | high   |
| Zlot et al. 2021       | USA              | HIC | February 29, 2020 to November 29, 2020 | International migrants                                                     | health outcomes of disease: SARS-CoV-2 cases                                           | Cohort study                                  | Almost 6% of the 2390 PLWH [people living with HIV] tested for COVID-19 had a positive COVID-19 result. PLWH with positive results tended to identify as American Indian/Alaska Native or Hispanic/Latinx. Younger (age<50) immigrant PLWH were more than twice as likely to have a positive COVID-19 result than did older (age≥50) US-born PLWH.                                                                                                                                                                                                                                                                                                                                                          | This study contributes to the evidence that American Indian/Alaska Native, Latinx and younger immigrant PLWH are at greater risk for other infections, such as SARS-CoV-2. Our findings of increased risk of COVID-19 diagnosis among communities of color and immigrants living with HIV suggest that in order to effectively create a level playing field, a multi-system, multi-layered approach that confronts and dismantles stigma and racism is needed at all levels.                                                                                                                                                                 | high   |

|                                                                                                                                                                                                                                                                                                                     |        |     |                                    |                        |                                                       |                       |                                                                                                                                                                                                                                                                                                                                                                                                                                                                                                                                                                                                                                                                                                        |                                                                                                                                                                                                                                                                                                                                                                                                                                                                               |        |
|---------------------------------------------------------------------------------------------------------------------------------------------------------------------------------------------------------------------------------------------------------------------------------------------------------------------|--------|-----|------------------------------------|------------------------|-------------------------------------------------------|-----------------------|--------------------------------------------------------------------------------------------------------------------------------------------------------------------------------------------------------------------------------------------------------------------------------------------------------------------------------------------------------------------------------------------------------------------------------------------------------------------------------------------------------------------------------------------------------------------------------------------------------------------------------------------------------------------------------------------------------|-------------------------------------------------------------------------------------------------------------------------------------------------------------------------------------------------------------------------------------------------------------------------------------------------------------------------------------------------------------------------------------------------------------------------------------------------------------------------------|--------|
| Drefahl et al. 2020                                                                                                                                                                                                                                                                                                 | Sweden | HIC | March 13, 2020 to May 7, 2020      | International migrants | health outcomes of disease: Mortality                 | Cohort study          | Immigrants from low- and middle-income countries from the Middle East and Northern Africa displayed more than three times higher mortality among men (HR: 3.13; 95% CI: 2.51, 3.90) and two times higher among women (HR: 2.09; 95% CI: 1.52, 2.89), as compared to those born in Sweden, (...) whereas immigrants from other low- and middle-income countries experienced more than twice as high mortality among men (HR: 2.20; 95% CI: 1.81, 2.69) and ~1.5 times higher mortality among women (HR: 1.45; 95% CI: 1.12, 1.90). Immigrants from HIC only displayed 19% higher mortality among men (HR: 1.19; 95% CI: 1.01, 1.39) and 8% higher mortality among women (HR: 1.08; 95% CI: 0.92, 1.26). | However, the robust finding of elevated mortality among immigrants from low- and middle-income countries deviates from findings on other causes of death, such as neoplasms or circulatory diseases, where immigrants tend to have lower mortality than natives. This finding may help guide governmental policy, and may be of relevance for other HIC as well. Better health care resources may need to be allocated toward communities with many foreign-born individuals. | medium |
| Jaqueti Aroca et al. 2020                                                                                                                                                                                                                                                                                           | Spain  | HIC | (data until) April, 2020           | International migrants | health outcomes of disease: SARS-CoV-2 cases          | Cross-Sectional Study | PCR was performed on 1,781 patients (1,522 Spanish and 259 immigrants), of which 919 have tested positive (51.6%; 782 Spaniards, 51.4%; and 136 immigrants, 52.5%). No differences were observed (Odds Ratio: 1.08; 95% CI: 0.95 - 1.24) in the rates of performing PCR in immigrants (8.4/1,000; 259/30,723) compared to the Spanish (7.8/1,000; 1,522/195,350).†                                                                                                                                                                                                                                                                                                                                     | The specific situation of the patients in our study, all of whom were treated at the hospital, would make it difficult to extrapolate our data to patients in general. †                                                                                                                                                                                                                                                                                                      | medium |
| Giorgi Rossi et al. 2020                                                                                                                                                                                                                                                                                            | Italy  | HIC | February 27, 2020 to April 2, 2020 | International migrants | health outcomes of disease: Hospitalisation Mortality | Cohort study          | Females had higher prevalence of infection than males below age 50 (2.61 vs. 1.84 %), but lower in older ages (16.49 vs. 20.86% over age 80). (...) After adjusting for age and comorbidities, men had a higher risk of hospitalization (HR 1.4 95% CI 1.2 to 1.6) and of death (HR 1.6, 95% CI 1.2 to 2.1). (...) Immigrants had a higher risk of hospitalization (HR 1.3, 95% CI 0.99 to 1.81) than Italians and a similar risk of death.                                                                                                                                                                                                                                                            | Identified susceptible populations and fragile patients should be considered when setting priorities in public health planning and clinical decision making.                                                                                                                                                                                                                                                                                                                  | high   |
| <p>*: Socioeconomic Development of Country based on the World Bank country classification by income; HIC: High income countries; UMIC: Upper-middle income countries; LMIC: Lower-middle income countries; LIC: Low income countries.<br/> †: Article in Spanish, results and conclusion cited were translated.</p> |        |     |                                    |                        |                                                       |                       |                                                                                                                                                                                                                                                                                                                                                                                                                                                                                                                                                                                                                                                                                                        |                                                                                                                                                                                                                                                                                                                                                                                                                                                                               |        |

Based on the sensitivity analysis, few studies were not eligible for the quantitative synthesis and therefore excluded from the meta-analysis (Supplementary File, Chapter 6.1; pp.103-106). Among the 26 studies reporting on SARS-CoV-2 cases,<sup>21-46</sup> 20 were eligible for quantitative synthesis.<sup>21,22,24,25,27,29-34,36,37,39-42,44-46</sup> Sample sizes comprised 40,019,567 individuals for cases, 1,310,219 for hospitalisation, 96,691 for ICU admission, and over five million for mortality. The *risk of infection* among migrants was 2.33 (95%-CI: 1.88-2.89) times the risk of non-migrants, with a RD of 7% (95%-CI: 0.02-0.13) (Fig. 2a). Inequalities in infection risk between migrants and non-migrants living in North America (RR = 2.65; 95%-CI: 1.34-5.26) or northern Europe (RR= 2.81; 95%-CI: 1.99-3.95) seemed to be higher than inequalities observed in southern Europe (RR = 1.70; 95%-CI: 1.23-2.35), whereby the actual RD compared to non-migrants was 9% (95%-CI: 0.01-0.17) in North America and 3-4% (95%-CI: 0.00-0.05; 0.01-0.08) in European countries (Fig. 2b).

### Figure 2a: Forest Plot of Relative Risk (A) and Risk Difference (B) of SARS-CoV-2 cases between migrants and non-migrants

Legend: Events: SARS-CoV-2 cases; Population: denominators; CI: Confidence Interval; I2 and Tau2: Measures of heterogeneity. Labberton et al. grouped migrants into two subgroups (foreign-born/foreign-born parents), hence the study appears twice in the analysis.<sup>34</sup> The same applies to Warszawski et al. who reported cases for May and November 2020.<sup>46</sup>

### Figure 2b: Forest Plot of Relative Risk (A) and Risk Difference (B) of SARS-CoV-2 cases between migrants and non-migrants by geographical region of study

Legend: Events: SARS-CoV-2 cases; Population: denominators; CI: Confidence Interval; I2 and Tau2: Measures of heterogeneity. Labberton et al. grouped migrants into two subgroups (foreign-born/foreign-born parents), hence the study appears twice in the analysis.<sup>34</sup> The same applies to Warszawski et al. who reported cases for May and November 2020.<sup>46</sup>

International migrants turned out to be the main migrant category studied (i.e., 76% of studies), and were mostly defined by indicators such as region of origin, country of birth, language, or nationality. We grouped studies based on the underlying indicators of migratory status and provide an explorative subgroup analysis in the supplement (Figure S16, p.118). Among these groups, inequalities in infection risk compared to non-migrants were highest in migrants living in any kind of shared accommodation (refugee camp, dormitory, detention facility) (RR = 3.91; 95%-CI: 1.71-8.97), albeit with wide PI indicating high between study variations.<sup>21,33,40</sup> Infection risk in migrants whose migratory status was defined by residence status, nationality of parents, country of birth, or region of origin was more than twice the risk of non-migrants (with narrow PIs), but inequalities were less pronounced among foreign workers and when migration status was defined via language (Supplementary File, Figure S16, p.118).

13 studies reported on *hospitalisation* of migrant and non-migrant SARS-CoV-2 infected individuals,<sup>27,28,32,34,39,47-54</sup> whereof nine studies were eligible for quantitative synthesis.<sup>27,28,32,34,39,47,48,51,54</sup> Overall, the risk of hospitalisation appeared to be similar among both population groups (RR = 1.05; 95%-CI: 0.80-1.37) (Fig. 3). However, studies from southern Europe showed a lower risk in migrants compared to non-migrants,<sup>51,54</sup> whereas studies conducted in northern Europe reported slightly elevated risk among migrants (Fig. 3).<sup>27,28,32,34,39,48</sup>

### Figure 3: Forest Plot of Relative Risk (A) and Risk Difference (B) of hospitalised cases between migrants and non-migrants

Legend: Events: hospitalised cases; Population: denominators (SARS-CoV-2 cases); CI: Confidence Interval; I2 and Tau2: Measures of heterogeneity.

The meta-analysis of the outcome *ICU admission* included eight out of ten studies and showed 1.36 (95%-CI: 1.04-1.78) times the risk in migrants compared to non-migrants (Fig. 4).<sup>27,40,47,51,54-59</sup> The risk difference among the groups was relatively low (RD = 0.04; 95%-CI: -0.00-0.07) (Fig. 4).

### Figure 4: Forest Plot of Relative Risk (A) and Risk Difference (B) of ICU admissions between migrants and non-migrants

Legend: Events: ICU admissions; Population: denominators (hospitalised cases); CI: Confidence Interval; I2 and Tau2: Measures of heterogeneity.

As for *mortality*, 16 out of 18 studies were eligible for meta-analysis (Supplementary File, pp.112-117).<sup>27,28,39,40,47,51,53,56-66</sup> Studies with mortality as outcome used different denominators: hospitalised cases vs. all-deaths within the respective time-period and geographic region. This resulted in different trends and patterns of inequality. With hospitalised cases as denominator for incident deaths, the mortality risk in migrants was almost half that of non-migrants (RR = 0.47; 95%-CI: 0.30-0.73) with a risk difference of -7% (95%-CI: -0.12-(-0.02)) (Fig. 5) based on a sample size of 22,561 study participants. If studies reported excess mortality (i.e. using all-

deaths in the population), the risk for fatal outcomes due to or associated with SARS-CoV-2 was 1·31 (95%-CI: 0·95-1·80) the risk in migrants compared to non-migrants, however the difference between the groups was comparably low (RD = 0·03; 95%-CI: -0·02-0·09) (Fig. 5). For this analysis 5,062,317 study participants were included.

**Figure 5: Forest Plot of Relative Risk and Risk Difference of mortality between migrants and non-migrants for hospitalised cases A) and B) and based on all deaths C) and D)**

Legend: Events: SARS-CoV-2-related deaths; Population: denominators (hospitalised cases A) and B); all deaths C) and D)); CI: Confidence Interval; I<sup>2</sup> and Tau<sup>2</sup>: Measures of heterogeneity.

The *qualitative synthesis* was based on 44 high- to moderate-quality articles and provided insights into the syndemic nature of the COVID-19 pandemic by showing the complex interactions between social- and COVID-19-related factors that have resulted in relative disadvantages for migrants.<sup>43,67-109</sup> Figure 6 illustrates exposures, risks, and impact of COVID-19 measures as well as sources of resilience for migrant populations, each at micro-, meso-, macro-levels (i.e., at the level of the individual, the family/community, and state/society, including policies and institutions such as the healthcare system or the labour market). Factors in the different categories and on the different levels interacted and compromised the physical and psychosocial health of migrants in severe and sometimes unique ways.

Our synthesis shows that migrants faced exposures at meso- and macro-level; among these crowded housing conditions, and lack of work security, and/or governmental support emerged as particularly critical.<sup>43,67,77,103,108</sup> Some studies further pointed to the role of social norms in creating exposures, describing e.g. that some (*more communitarian*) communities may tend to put pressure on their members to participate in gatherings and events. Risks (e.g., higher risk of infection) existed at all three levels. At the individual level, the included studies identified unaffordability of personal protective equipment, low health literacy and language barriers.<sup>67,74,79</sup> These risk factors can be cross-referenced to the macro-level, as other studies reported late, insufficient or no provision of health information in ways that accommodate linguistic diversity formal barriers to health services and distrust in institutions, including public health services.<sup>67,79</sup> Risks at the meso-level include the (threat of) penalisation of preventive and response measures by employers and camp managers, which may deter migrants, e.g., from demanding protective equipment or testing.

Among the impacts of the COVID-19 pandemic and pandemic measures, three interrelated individual-level factors figured prominently across the literature: economic consequences of lockdown measures (such as job loss), impacts on migration prospects, and trajectories (mainly related to disruption of migration related services such as visas and work permit renewal or the processing of asylum applications), which put migrants in states of legal and social insecurity, and, as a corollary, uncertainties and fears of failing one's migration project.<sup>68,71,73,75,77,80,83,88,90,95,99</sup> These factors are intertwined with meso-level factors: e.g., the inability to fulfil social roles (such as acting as the family's breadwinner, sending remittances), impacted social and family dynamics, including gender and intergenerational roles).<sup>68,75,80,85,89,90,102</sup> Further, impacts on the macro-level include increased discrimination and, in some settings, the effects of differential pandemic measures. For instance, migrants in camp-like settings (e.g. asylum-seekers, refugees, labour migrants in congregate housing) as well as in-house domestic workers were often subjected to severe mobility restrictions; also in many camp-like settings, collective response measures such as mass quarantine or labour quarantine were imposed on the residents. Our analysis thus highlights the severe, to some extent unique, and in part unintended consequences of pandemic control measures for migrants.<sup>69,71,72,80,81,90,94,104</sup> More than the pandemic itself, these unintended consequences of pandemic measures have contributed significantly to the severe psychosocial impact on migrants.<sup>69,84</sup>

**Figure 6: Risks and impacts related to Covid-19 and pandemic measures for migrants: A summary of qualitative research findings**

Our analysis pinpoints sources of individual, community and systemic resilience that can counteract some of the above described exposures, risks and impacts of pandemic measures. Among the main individual-level sources of resilience are optimistic framings of the crisis (e.g., “We’ve been through worse.”) and the exchange with family and peers via internet and social media. Mutual (material and/ or psychosocial) support as well as decent work conditions that allow for a sense of control and participation are important community-level sources of resilience. Macro-level sources of resilience include access to governmental assistance, the tailored provision of health information, trust in the authorities, and legal status, which is key to being able to assert one's rights. Effective intersectoral exchange and collaboration enhance health system resilience. However, our analysis also shows that many of these sources of resilience have been inaccessible or unavailable for migrants during the COVID-19 pandemic, especially those on meso- and macro-levels.<sup>43,77</sup>

Eventually, our analysis highlights the multifaceted interrelations among the various factors in the different categories and on the different levels, with some key factors triggering cascading effects and feedback loops (Panel 4).

#### **Panel 4: Cascading effects and feedback loops for different migrant groups deriving from pandemic control measures**

##### **Vignette a) “Migrants with precarious legal status”**

The pandemic-related closure of offices and services obstructed the renewal of residence and work permits for migrants with precarious legal status. Informal labour markets were severely impacted by pandemic measures, leading to widespread loss of jobs and livelihoods, with no social safety nets in place. The resulting legal and economic insecurities amplified existing power differentials, put migrants at risk of exploitation, and generated major psychosocial distress due to the uncertain future prospects in the host country. The pressure to send money to families and communities in their home countries exacerbated such distress. The coping strategies of migrants and their families sometimes involved extremely hazardous employment, including child labour and survival prostitution. This, in turn, increased the exposure to and risk of a SARS-CoV-2 infection, but also other health issues such as injuries, sexually transmittable diseases, violence, unwanted pregnancies, and ill mental health. Adverse social consequences include descent into extreme poverty, food insecurity, impacts on children’s education, stigma, and tensions within families over changing gender and intergenerational roles. Access to social and health services, including tailored services such as walk-in clinics for uninsured patients, were also compromised due to the pandemic. The only available source of material and psychosocial support were often informal networks based on kinship, diaspora and/or religious communities.

*(Synthesis based on Babuc 2021, Da Mosto et al. 2021, Knights et al. 2021, Filippi & Giliberti 2021, Im & George 2021, Martuscelli 2021, Sabar et al. 2021, Sanò & Della Puppa 2021, Sohel et al. 2021, Thomas et al. 2021, Yee et al. 2021, Zambrano-Barragan et al. 2021)*

##### **Vignette b): “Migrant domestic care workers”**

Domestic care workers faced particularly strict pandemic measures and related changes in their working conditions: With their work permit and visa often bound to a specific client/employer, many had to accept severe mobility restrictions, namely cohabitation with their client in combination with strict curfews, and increased workloads (e.g. more cleaning and washing), alongside obligatory quarantine and testing measures, in order to keep their job. Cohabitation with the client meant a loss of personal freedom and privacy, longer working hours, constant availability, less rest and breaks, and more stress. Non-compliance with health and safety protection such as a lack of protective equipment or of paid sick leave was frequently noted. This increased health risks for domestic workers, including burnout and other mental health problems. Domestic workers were very concerned about being terminated due to a SARS-CoV-2 infection or for other health reasons, and in some studies they describe their work situation during the pandemic as a “prison” or as being trapped in a climate of constant control, abuse and fear, with no options to leave an employer without also losing their work permit and visa.

In studies which described their situation in positive terms (e.g., as having a safe job and income and a safe place to stay), such framings depended on the quality of the relationship with the employer/client, and decent employment practices (e.g., ensuring the worker’s day off and participation in familial decision-making). Being able to communicate with the family back home during the pandemic, e.g. via social media, was described as another source of resilience – and at the same time as potential stressor. Many migrant domestic care workers continued being responsible for their (left behind) families in the home country. This double responsibility of care translated into a “dual-country experience of the pandemic”; i.e. worries for the health and well-being of the family back home, increased pressure to send remittances, alongside the (often sole) responsibility for the care and health of the client in the host country.

*(Synthesis based on: de Diego-Cordero et al. 2022, Lui et al. 2021, Kaur-Gill et al. 2021, Kuhlmann et al. 2020, Nasol & Francisco-Menchavez 2021, Sabar et al. 2021, Sanna 2021)*

Among all 241 studies (Supplementary File, Table S6; p. 35ff) we identified seven studies (2.9% of all studies) that investigated vaccination coverage among migrants either empirically or anticipated by statistical models.<sup>37,78,110–114</sup> Two modelling studies with medium and low quality recommended to include migrants in the national vaccination strategy to prevent COVID-19 incidence and ensure cost-effectiveness.<sup>111,113</sup> One medium quality study reported vaccination coverage within a Spanish prison but focussed on vaccination effectiveness of the respective vaccine.<sup>37</sup> Three studies of high and medium quality from the European context reported lower vaccination rates among migrants (i.e., foreign-born) in comparison to the non-foreign-born population.<sup>78,110,112</sup> The opposite, namely higher vaccination uptake among migrants compared to local residents was found in a medium quality study conducted in Nanjing and Chizhou, China.<sup>114</sup>

## DISCUSSION

Our meta-analysis quantified inequalities between migrants and non-migrants in risk of COVID-19 infection, hospitalisation, ICU-admission, and death. We found that the incidence risk was more than twice the risk among migrants than among non-migrants, and was about seven percentage-points higher on average. Inequalities tended to be more pronounced in Northern Europe and North America, and lower in Southern Europe. These differences could be related to differences in access to health systems (e.g., based on legal status), in testing policies and management of SARS-CoV-2 cases, or in environmental risks (e.g., occupation and accommodation). Migrants in camps or other forms of institutionalised/shared accommodation appeared to be at highest risk of infection, albeit PIs for the subgroup analysis by migrant categories were extremely broad and overlapped (indicating high heterogeneity between studies within subgroups), so that differences should be interpreted with care.

We found no evidence for inequalities in risk of hospitalisation, which stands in contrast to inequalities observed between ethnic minorities and majority populations, indicating that different mechanisms are at play in the pathway between health and ethnicity versus migration.<sup>115</sup> However, our meta-analysis indicates that, once infected and hospitalised, migrants may have experienced more severe courses of disease: the risk of being admitted to ICU was 36% higher in relative, and 4 percentage-points higher in absolute terms among migrants compared to non-migrants (albeit with broad PIs). While the share of migrants in deaths among hospitalised cases was lower (likely due to age differences), their share among deaths at population-level measured by excess-mortality was 31% higher in relative, and three percentage-points higher in absolute terms, compared to resident populations in respective studies.

Intersections among COVID-19-related exposures, risks, and impacts of pandemic measures in migrant populations compromised their physical and mental health in severe and sometimes unique ways. Cascading effects and feedback loops became evident, highlighting the syndemic nature of the COVID-19 pandemic.<sup>116,117</sup> Yet, we also found (potential) sources of resilience, indicating entry points for measurements (e.g., support from non-governmental organisations, peers or the local community) to improve migrants' conditions in health emergencies. Overall, the qualitative results highlight the key role of socio-economic and work-related precarity, in combination with legal precarity.<sup>67,86,91</sup> This is further underscored by studies, which describe that different States (i.e., Austria, Canada, and Italy) approved special policies to recruit migrant workers amid lockdown to work as fruit pickers and in other agricultural sectors, often in precarious labour contexts.<sup>43,86,98</sup> Asylum seekers and other undocumented migrants were also absorbed in "essential" sectors to meet labour shortages.<sup>118</sup> These examples illustrate the reliance of global economies of production on certain migrants as a captive and cheap workforce. And at the same time the COVID-19 pandemic has also shown that the same business models systematically shift the social costs of labour, including health risks, to the migrant workers themselves.<sup>119</sup> The qualitative results thus underscore the importance of a political economy-perspective to understand the structures that generate and sustain social and health inequities for migrants. Sub-regional and regional governance structures that promote trade and mobility for economic cooperation, need to ensure migrant health as a key requisite of development. There is a critical need for governments, international organisations, civil society and migrant communities to engage with private sector, employers and industries in which migrant workers are overrepresented in precarious work contexts, with low-wages and with an irregular status. The underutilisation of the domain of work, including occupational health programs, in addressing the health of migrants is indeed truly a missed opportunity for global health.<sup>120</sup>

We found a high degree of heterogeneity among studies regarding the design, migrant populations, quality of data, and countries of studies. Poor reporting in primary studies raised considerable challenges in meta-analysis. This was most pronounced for mortality due to the use of different denominators: hospitalised SARS-CoV-2 cases or all-cause deaths in the total population. These two ways of reporting mortality have been identified by Karanikolos and McKee as a factor which substantially limits the comparability of COVID-19-related mortality between countries.<sup>121</sup> Our review underlines the need for harmonised reporting in future health emergencies to ensure comparability of mortality estimates across countries and studies. The trend to lower mortality in hospitalised cases is dependent on testing strategies, and adjustment for age and comorbidities, which was not always performed in primary studies yielding estimates prone to confounding. In contrast, excess rates of age- and sex-standardised mortality are more likely to reflect the true mortality risks. In view of this, our results show that migrants tended to be at considerably higher risk of death associated with COVID-19 than non-migrants during the pandemic (until 11/2021).

The strength of this review is the synthesis of all (high to moderate quality) evidence from qualitative and quantitative studies on health-related impacts of the COVID-19 pandemic on migrants worldwide. The analysis of the interconnectedness of exposure, risk, and impact of pandemic measures at micro-, meso-, and macro-levels benefitted from qualitative research, which captures social phenomena in their complexity and within their particular context, thereby allowing us to contextualise findings. Despite an overwhelmingly broad landscape of literature, however, our knowledge of some groups and migration phases still remains scarce and sketchy, for

example, related to labour migrants, undocumented migrants, migrants with disabilities, elderly migrants, returnees, migrants in transit or in pre-migration phases. Countries of studies were mainly destination countries so that evidence is skewed toward COVID-19-related migrant health in the *post-migration* phase. Further efforts are required to better reflect health-related aspects of the complex migration trajectory.

The meta-analysis provides valuable evidence of the magnitude of COVID-19-related inequalities, despite being limited by the striking heterogeneity of underlying primary studies. Cautious interpretation is required, however, due to poor quality of reporting in primary quantitative studies. We could not adjust the RR for age and sex because the data were either not reported or even unavailable to the authors of primary studies upon request. This highlights the urgent need to improve the reporting quality and primary data in studies presenting migration-stratified outcomes. The broad search enabled to include studies from different research fields, but this posed a challenge to the applicability of the quality appraisal tools. For 15 studies, only a few questions of the JBI checklists were applicable. We included English, German and Spanish articles, so that other languages, e.g., French, Chinese or Arabic, could not be considered and thus studies from respective countries may not have been included.

Our review sheds a glaring light on the lack of evidence on important measures of pandemic response, such as vaccination coverage among migrants, not only until the end of 2021. Updating our search in the WHO COVID-19 research database on vaccination coverage among migrants for the years 2022 and 2023 resulted in 204 hits (April 2023). Of these, only about 15 studies addressing this topic could be identified after screening titles to report vaccination coverage/uptake/rates among the respective migrant populations. As with the search for this review, the focus of the research appears to be on *vaccination hesitancy, knowledge* and *attitudes* toward COVID-19 vaccination, or different *ethnic* groups, rather than on *coverage rates* in migrants as defined previously. The scarcity and poor quality of reporting of studies points to the weakness of Health Information Systems (HIS) to provide reliable data on key aspects of migrant health such as vaccination coverage, by the end of 2021, and even in 2023. The lack of harmonisation across different migrant categories and outcome measures puts validity and comparability of findings at risk. Our findings hence call for urgent implementation of recommendations and WHO technical guidance to enhance the integration and availability of migrant indicators in HIS.<sup>122,123</sup> This requires urgent action in the post-COVID-19 recovery phase to bridge the divides between health and migration governance by means of effective collaboration structures at all levels of government (local, national, international).<sup>124</sup> Monitoring migrant health should be considered an essential component of pandemic preparedness, and future national plans must secure an adequate inclusion of migrant groups which promote social and health equity. This includes anticipation and prevention of unequal effects or unintended (negative) consequences of the pandemic on migrant health that are exacerbated by language barriers, stigma and discrimination, and by financial, administrative and legal barriers to health systems.

### **Contributors**

MH: Conceptualization, Methodology, Investigation, Data curation, Formal analysis – statistical analysis, Writing – Original Draft, Visualization, Project administration

NG: Investigation, Formal analysis – qualitative analysis, Data curation, Visualization, Writing – Review & Editing

SR: Methodology, Investigation, Formal analysis – statistical analysis, Data curation, Visualization, Writing – Review & Editing

JO: Investigation, Data curation, Formal analysis, Visualization, Writing – Review & Editing

MB: Investigation, Formal analysis – qualitative analysis, Writing – Review & Editing

SA: Methodology Investigation, Formal analysis – qualitative analysis, Writing – Review & Editing

JL: Methodology, Investigation, Formal analysis – qualitative analysis, Writing – Review & Editing

SF: Investigation, Writing – Review & Editing

AM: Investigation, Writing – Review & Editing

KW: Conceived the study, Conceptualization, Methodology, Writing – Review & Editing

KB: Conceived the study, Conceptualization, Methodology, Investigation, Formal analysis, Validation, Writing – Review & Editing, Supervision, Funding acquisition

All authors had full access to all data in the study and had final responsibility for the decision to submit for publication.

### **Declarations of interest**

AM, KB, MH, SF received an individual honorarium from IOM. All authors declare no competing interests.

### **Data sharing**

A full list of studies identified in the search as well as the full data extracted from included studies are available for academic research projects by request to the corresponding author: [Kayvan.bozorgmehr@uni-bielefeld.de](mailto:Kayvan.bozorgmehr@uni-bielefeld.de)



## Acknowledgments

No funding received.

## References

- 1 World Health Organization. International Health Regulations (2005) - Third edition. Geneva, Switzerland: WHO, 2016.
- 2 WHO Headquarters. 2019 Novel Coronavirus (2019-nCoV): Strategic preparedness and response plan. *WHO* 04.02.2020.
- 3 World Health Organization. COVID-19 Strategic Preparedness and Response Plan (SPRP 2021). *WHO* 24.02.2021.
- 4 Orcutt M, Patel P, Burns R, et al. Global call to action for inclusion of migrants and refugees in the COVID-19 response. *Lancet* 2020; **395**: 1482–83. [https://doi.org/10.1016/S0140-6736\(20\)30971-5](https://doi.org/10.1016/S0140-6736(20)30971-5).
- 5 Hayward SE, Deal A, Cheng C, et al. Clinical outcomes and risk factors for COVID-19 among migrant populations in high-income countries: A systematic review. *J Migr Health* 2021; **3**: 100041. <https://doi.org/10.1016/j.jmh.2021.100041>.
- 6 Hintermeier M, Gencer H, Kajikhina K, et al. SARS-CoV-2 among migrants and forcibly displaced populations: A rapid systematic review. *J Migr Health* 2021; **4**: 100056. <https://doi.org/10.1016/j.jmh.2021.100056>.
- 7 Jahn R, Hintermeier M, Bozorgmehr K. SARS-CoV-2 attack rate in reception and accommodation centres for asylum seekers during the first wave: Systematic review of outbreak media reports in Germany. *J Migr Health* 2022; **5**: 100084. <https://doi.org/10.1016/j.jmh.2022.100084>.
- 8 Jaljaa A, Caminada S, Tosti ME, et al. Risk of SARS-CoV-2 infection in migrants and ethnic minorities compared with the general population in the European WHO region during the first year of the pandemic: a systematic review. *BMC Public Health* 2022; **22**: 143. <https://doi.org/10.1186/s12889-021-12466-1>.
- 9 Mengesha Z, Alloun E, Weber D, Smith M, Harris P. "Lived the Pandemic Twice": A Scoping Review of the Unequal Impact of the COVID-19 Pandemic on Asylum Seekers and Undocumented Migrants. *Int J Environ Res Public Health* 2022; **19**. <https://doi.org/10.3390/ijerph19116624>.
- 10 World Health Organization. Refugees and migrants in times of COVID-19: mapping trends of public health and migration policies and practices. Geneva, 2021.
- 11 International Organization for Migration. Glossary on Migration. International Migration Law N°34. [https://publications.iom.int/system/files/pdf/iml\\_34\\_glossary.pdf](https://publications.iom.int/system/files/pdf/iml_34_glossary.pdf) (accessed May 02, 2023).
- 12 Nations High Commissioner for Refugees. Handbook on Procedures and Criteria for Determining Refugee Status under the 1951 Convention and the 1967 Protocol Relating to the Status of Refugees 2019.
- 13 Bielefeld University. Rapid Review Response Unit (RRRU). <https://www.uni-bielefeld.de/fakultaeten/gesundheitswissenschaften/ag/ag2/rrrun/> (accessed Jul 04, 2023).
- 14 JBI. Critical Appraisal Tools. <https://jbi.global/critical-appraisal-tools> (accessed May 02, 2023).
- 15 Bennett C, Manuel DG. Reporting guidelines for modelling studies. *BMC Med Res Methodol* 2012; **12**: 168. <https://doi.org/10.1186/1471-2288-12-168>.
- 16 Dahabreh IJ, Trikalinos TA, Balk EM, Wong JB. Guidance for the Conduct and Reporting of Modeling and Simulation Studies in the Context of Health Technology Assessment. In: AHRQ Methods for Effective Health Care : Methods Guide for Effectiveness and Comparative Effectiveness Reviews. Rockville (MD), 2008.
- 17 Egger M, Johnson L, Althaus C, et al. Developing WHO guidelines: Time to formally include evidence from mathematical modelling studies. *F1000Res* 2017; **6**: 1584. <https://doi.org/10.12688/f1000research.12367.2>.
- 18 Saltelli A, Bammer G, Bruno I, et al. Five ways to ensure that models serve society: a manifesto. *Nature* 2020; **582**: 482–84. <https://doi.org/10.1038/d41586-020-01812-9>.
- 19 Borenstein M, Hedges LV, Higgins JP, Rothstein HR. Introduction to Meta-Analysis John Wiley & Sons. *Ltd, Chichester, UK* 2009.
- 20 Diderichsen F, Evans T, Whitehead M. The social basis of disparities in health // The Social Basis of Disparities in Health. In: Challenging Inequalities in Health: From Ethics to Action: 12–23.
- 21 Casanova FO, Hamblett A, Brinkley-Rubinstein L, Nowotny KM. Epidemiology of Coronavirus Disease 2019 in US Immigration and Customs Enforcement Detention Facilities. *JAMA Netw Open* 2021; **4**: e2034409-e2034409. <https://doi.org/10.1001/jamanetworkopen.2020.34409>.
- 22 D'Ambrosi F, Iurlaro E, Tassis B, Di Maso M, Erra R, Cetera GE, Cesano N, Di Martino D, Ossola MW, Ferrazzi EM. Sociodemographic characteristics of pregnant women tested positive for COVID-19 admitted to a referral center in Northern Italy during lockdown period. *J Obstet Gynaecol Res* 2021; **47**: 1751–56. <https://doi.org/10.1111/jog.14729>.
- 23 Erfani P, Uppal N, Lee CH, Mishori R, Peeler KR. COVID-19 Testing and Cases in Immigration Detention Centers, April-August 2020. *JAMA* 2021; **325**: 182–84. <https://doi.org/10.1001/jama.2020.21473>.

- 24 Brinkmann F, Diebner HH, Matenar C, Schlegtehdal A, Eitner L, Timmesfeld N, Maier C, Lücke T. Seroconversion rate and socio-economic and ethnic risk factors for SARS-CoV-2 infection in children in a population-based cohort, Germany, June 2020 to February 2021. *Euro Surveill* 2022; **27**: 2101028. <https://doi.org/10.2807/1560-7917.ES.2022.27.37.2101028>.
- 25 Guijarro C, Pérez-Fernández E, González-Piñeiro B, et al. Differential risk for COVID-19 in the first wave of the disease among Spaniards and migrants from different areas of the world living in Spain. *Rev Clin Esp (Barc)* 2021; **221**: 264–73. <https://doi.org/10.1016/j.rceng.2020.10.005>.
- 26 Harkness A, Weinstein ER, Mayo D, Rodriguez-Diaz C, Safren SA. Latinx Sexual Minority Men's Behavioral, Psychosocial, and Medical Experiences during COVID-19: Differences across Immigration Statuses. *Ann LGBTQ Public Popul Health* 2021; **2**: 104–15. <https://doi.org/10.1891/lgbtq-2020-0054>.
- 27 Holmberg V, Salmi H, Kattainen S, Ollgren J, Kantele A, Pynnönen J, Järvinen A, Forsblom E, Silén S, Kivivuori SM, Meretoja A, Hästbacka J. Association between first language and SARS-CoV-2 infection rates, hospitalization, intensive care admissions and death in Finland: a population-based observational cohort study. *Clin Microbiol Infect* 2022; **28**: 107–13. <https://doi.org/10.1016/j.cmi.2021.08.022>.
- 28 Indseth T, Grøslund M, Arnesen T, et al. COVID-19 among immigrants in Norway, notified infections, related hospitalizations and associated mortality: A register-based study. *Scand J Public Health* 2021; **49**: 48–56. <https://doi.org/10.1177/1403494820984026>.
- 29 Jaqueti Aroca J, Molina Esteban LM, García-Arata I, García-Martínez J. COVID-19 en pacientes españoles e inmigrantes en un área sanitaria de Madrid. *Rev Esp Quimioter* 2020; **33**: 289–91. <https://doi.org/10.37201/req/041.2020>.
- 30 Johnson-Agbakwu CE, Eakin CM, Bailey CV, et al. Severe acute respiratory syndrome coronavirus 2: a canary in the coal mine for public safety net hospitals. *AJOG Glob Rep* 2021; **1**: 100009. <https://doi.org/10.1016/j.xagr.2021.100009>.
- 31 Kjøllesdal M, Magnusson K. Occupational risk of COVID-19 by country of birth. A register-based study. *J public health (Oxf)* 2021. <https://doi.org/10.1093/pubmed/fdab362>.
- 32 Kjøllesdal M, Skyrud K, Gele A, et al. The correlation between socioeconomic factors and COVID-19 among immigrants in Norway: a register-based study. *Scand J Public Health* 2021; 14034948211015860-14034948211015860. <https://doi.org/10.1177/14034948211015860>.
- 33 Kondilis E, Papamichail D, McCann S, et al. The impact of the COVID-19 pandemic on refugees and asylum seekers in Greece: A retrospective analysis of national surveillance data from 2020. *Eclinicalmedicine* 2021; **37**: 100958. <https://doi.org/10.1016/j.eclinm.2021.100958>.
- 34 Labberton AS, Godøy A, Elgersma IH, Strand BH, Telle K, Arnesen T, Nygård KM, Indseth T. SARS-CoV-2 infections and hospitalisations among immigrants in Norway-significance of occupation, household crowding, education, household income and medical risk: a nationwide register study. *Scand J Public Health* 2022; **50**: 772-781. <https://doi.org/10.1177/14034948221075029>.
- 35 Lombardi A, Mangioni D, Consonni D, et al. Seroprevalence of anti-SARS-CoV-2 IgG among healthcare workers of a large university hospital in Milan, Lombardy, Italy: a cross-sectional study. *BMJ open* 2021; **11**: e047216-e047216. <https://doi.org/10.1136/bmjopen-2020-047216>.
- 36 Mallet Y, Pivette M, Revest M, et al. Identification of Workers at Increased Risk of Infection During a COVID-19 Outbreak in a Meat Processing Plant, France, May 2020. *Food Environ Virol* 2021; **13**: 535–43. <https://doi.org/10.1007/s12560-021-09500-1>.
- 37 Marco A, Teixidó N, Guerrero R, Puig L, Rué X, Cobo A, Barnés I, Turu E. [preprint] Outbreak of SARS-CoV-2 in a prison: Low effectiveness of a single dose of the adenovirus vector ChAdOx1 vaccine in recently vaccinated inmates 2021. <https://medrxiv.org/cgi/content/short/2021.08.03.21258337>.
- 38 Mema S, Frosst G, Hanson K, et al. COVID-19 outbreak among temporary foreign workers in British Columbia, March to May 2020. *Can Commun Dis Rep* 2021; **47**: 5–10. <https://doi.org/10.14745/ccdr.v47i01a02>.
- 39 Methi F, Hart RK, Godøy AA, Jørgensen SB, Kacelnik O, Telle KE. Transmission of SARS-CoV-2 into and within immigrant households: nationwide registry study from Norway. *J Epidemiol Community Health* 2021. <https://doi.org/10.1136/jech-2021-217856>.
- 40 Ngiam JN, Chew N, Tham SM, et al. Demographic shift in COVID-19 patients in Singapore from an aged, at-risk population to young migrant workers with reduced risk of severe disease. *Int J Infect Dis* 2021; **103**: 329–35. <https://doi.org/10.1016/j.ijid.2020.11.157>.
- 41 Otto WR, Grundmeier RW, Montoya-Williams D, et al. Association between Preferred Language and Risk of Severe Acute Respiratory Syndrome Coronavirus 2 Infection in Children in the United States. *Am. j. trop. med. hyg* 2021. <https://doi.org/10.4269/ajtmh.21-0779>.
- 42 Pagani G, Conti F, Giacomelli A, et al. Differences in the Prevalence of SARS-CoV-2 Infection and Access to Care between Italians and Non-Italians in a Social-Housing Neighbourhood of Milan, Italy. *Int. j. environ. res. public health (Online)* 2021; **18**. <https://doi.org/10.3390/ijerph182010621>.

- 43 Vosko LF, Spring C. COVID-19 Outbreaks in Canada and the Crisis of Migrant Farmworkers' Social Reproduction: Transnational Labour and the Need for Greater Accountability Among Receiving States. *Int. Migration & Integration* 2022; **23**: 1765–91. <https://doi.org/10.1007/s12134-021-00905-2>.
- 44 Wiedmeyer ML, Goldenberg S, Peterson S, Wanigaratne S, Machado S, Tayyar E, Braschel M, Carrillo R, Sierra-Heredia C, Tuyisenge G, Lavergne MR. [preprint] SARS-CoV-2 testing and COVID-19 related primary care use among people with citizenship, permanent residency, and temporary immigration status in British Columbia: Cross-sectional analysis of population-based administrative data 2021.
- 45 Zlot AI, Capizzi J, Bush L, Menza TW. Impact of COVID-19 Among Immigrant and Communities of Color Living with HIV in Oregon, 2020: Two Pandemics Rooted in Racism. *J Immigr Minor Health* 2021; **23**: 1348–53. <https://doi.org/10.1007/s10903-021-01281-w>.
- 46 Warszawski J, Meyer L, Franck J-E, et al. Trends in social exposure to SARS-Cov-2 in France. Evidence from the national socio-epidemiological cohort-EPICOV. *PLoS one* 2022; **17**: e0267725. <https://doi.org/10.1371/journal.pone.0267725>.
- 47 Al Awaidey ST, Khamis F, Al Rashidi B, Al Wahaibi AH, Albahri A, Mahomed O. Epidemiological Characteristics of 69,382 COVID-19 Patients in Oman. *J Epidemiol Glob Health* 2021; **11**: 326–37. <https://doi.org/10.1007/s44197-021-00001-9>.
- 48 Coyer L, Wynberg E, Buster M, et al. Hospitalisation rates differed by city district and ethnicity during the first wave of COVID-19 in Amsterdam, The Netherlands. *BMC Public Health* 2021; **21**: 1721. <https://doi.org/10.1186/s12889-021-11782-w>.
- 49 Dressler A, Finci I, Wagner-Wiening C, Eichner M, Brockmann SO. Epidemiological analysis of 3,219 COVID-19 outbreaks in the state of Baden-Wuerttemberg, Germany. *Epidemiol Infect* 2021; **149**: e101–e101. <https://doi.org/10.1017/S0950268821000911>.
- 50 Engjom H, Aabakke, Anna J. M., Klungsoyr K, et al. COVID-19 in pregnancy-characteristics and outcomes of pregnant women admitted to hospital because of SARS-CoV-2 infection in the Nordic countries. *Acta Obstet Gynecol Scand* 2021; **100**: 1611–19. <https://doi.org/10.1111/aogs.14160>.
- 51 Fabiani M, Mateo-Urdiales A, Andrianou X, et al. Epidemiological characteristics of COVID-19 cases in non-Italian nationals notified to the Italian surveillance system. *Eur J Public Health* 2021; **31**: 37–44. <https://doi.org/10.1093/eurpub/ckaa249>.
- 52 Ingraham NE, Purcell LN, Karam BS, et al. Racial and Ethnic Disparities in Hospital Admissions from COVID-19: Determining the Impact of Neighborhood Deprivation and Primary Language. *J Gen Intern Med* 2021; **36**: 3462–70. <https://doi.org/10.1007/s11606-021-06790-w>.
- 53 Giorgi Rossi P, Marino M, Formisano D, Venturelli F, Vicentini M, Grilli R. Characteristics and outcomes of a cohort of COVID-19 patients in the Province of Reggio Emilia, Italy. *PLoS one* 2020; **15**: e0238281. <https://doi.org/10.1371/journal.pone.0238281>.
- 54 Sempere-González, A., Salvador, F., Monforte, A., Sampol, J., Espinosa-Pereiro, J., Miarons, M., Bosch-Nicolau P, Guillén-Del-Castillo A, Aznar ML, Campos-Varela I, Sánchez-Montalvá A, Leguizamo-Martínez LM, Oliveira I, Antón A, Almirante, B. COVID-19 Clinical Profile in Latin American Migrants Living in Spain: Does the Geographical Origin Matter? *Journal of Clinical Medicine* 2021; **10**: 5213. <https://doi.org/10.3390/jcm10225213>.
- 55 Diaz-Menéndez M, Trigo E, Borobia AM, et al. Presenting characteristics and outcomes of migrants in a cohort of hospitalized patients with COVID-19: Does the origin matter? *Travel Med Infect Dis* 2021; **42**: 102027. <https://doi.org/10.1016/j.tmaid.2021.102027>.
- 56 Hamadah H, Alahmad B, Behbehani M, et al. COVID-19 clinical outcomes and nationality: results from a Nationwide registry in Kuwait. *BMC Public Health* 2020; **20**: 1384. <https://doi.org/10.1186/s12889-020-09490-y>.
- 57 Kalani N, Hatami N, Haghbeen M, Yaqoob U, Raeyat Doost E. Covid-19 health care for afghan refugees as a minor ethnicity in iran;clinical differences and racial equality in health. *Acta Medica Iranica* 2021; **59**: 466–71.
- 58 Martín-Sánchez FJ, Valls Carbó A, Miró Ò, et al. Socio-Demographic Health Determinants Are Associated with Poor Prognosis in Spanish Patients Hospitalized with COVID-19. *J. gen. intern. med* 2021. <https://doi.org/10.1007/s11606-020-06584-6>.
- 59 Norman FF, Crespillo-Andújar C, Pérez-Molina JA, et al. COVID-19 and geographical area of origin. *Clin Microbiol Infect* 2021; **27**: 632.e1-632.e5. <https://doi.org/10.1016/j.cmi.2020.11.011>.
- 60 Aradhya S, Brandén M, Drefahl S, et al. Inter-marriage and COVID-19 mortality among immigrants. A population-based cohort study from Sweden. *BMJ open* 2021; **11**: e048952–e048952. <https://doi.org/10.1136/bmjopen-2021-048952>.
- 61 Canevelli M, Palmieri L, Raparelli V, et al. COVID-19 mortality among migrants living in Italy. *Ann Ist Super Sanita* 2020; **56**: 373–77. [https://doi.org/10.4415/ANN\\_20\\_03\\_16](https://doi.org/10.4415/ANN_20_03_16).
- 62 Drefahl S, Wallace M, Mussino E, et al. A population-based cohort study of socio-demographic risk factors for COVID-19 deaths in Sweden. *Nat Commun* 2020; **11**: 5097. <https://doi.org/10.1038/s41467-020-18926-3>.

- 63 Horner KM, Wrigley-Field E, Leider JP. A First Look: Disparities in COVID-19 Mortality Among US-Born and Foreign-Born Minnesota Residents. *Popul Res Policy Rev* 2022; **41**: 465–78. <https://doi.org/10.1007/s11113-021-09668-1>.
- 64 Lusk JL, Chandra R. Farmer and farm worker illnesses and deaths from COVID-19 and impacts on agricultural output. *PLoS one* 2021; **16**: e0250621–e0250621. <https://doi.org/10.1371/journal.pone.0250621>.
- 65 Nair SC, Gasmelseed HI, Khan AA, et al. Assessment of mortality from COVID-19 in a multicultural multi-ethnic patient population. *BMC Infect Dis* 2021; **21**: 1115. <https://doi.org/10.1186/s12879-021-06762-9>.
- 66 Rostila M, Cederström A, Wallace M, Brandén M, Malmberg B, Andersson G. Disparities in Coronavirus Disease 2019 Mortality by Country of Birth in Stockholm, Sweden: A Total-Population-Based Cohort Study. *Am J Epidemiol* 2021; **190**: 1510–18. <https://doi.org/10.1093/aje/kwab057>.
- 67 Gele A, Sheikh NS, Kour P, Qureshi SA. Uptake of Covid-19 Preventive Measures Among 10 Immigrant Ethnic Groups in Norway. *Front Public Health* 2022; **10**: 809726. <https://doi.org/10.3389/fpubh.2022.809726>.
- 68 Babuç ZT. A Relational Sociological Analysis on the Impact of COVID-19 Pandemic Lockdown on Syrian Migrants' Lives in Turkey: The Case of Mersin Province. *J Int Migr Integr* 2021: 1–22. <https://doi.org/10.1007/s12134-021-00907-0>.
- 69 Bojorquez I, Odgers-Ortiz O, Olivás-Hernández OL. Psychosocial and mental health during the COVID-19 lockdown: A rapid qualitative study in migrant shelters at the Mexico-United States border. *Salud Mental* 2021; **44**: 167–75. <https://doi.org/10.17711/sm.0185-3325.2021.022>.
- 70 Lusambili AM, Martini M, Abdirahman F, Asante A, Ochieng S, Guni JN, Maina R, Luchters S. "We have a lot of home deliveries" A qualitative study on the impact of COVID-19 on access to and utilization of reproductive, maternal, newborn and child health care among refugee women in urban Eastleigh, Kenya. *J Migr Health* 2020; **1**: 100025. <https://doi.org/10.1016/j.jmh.2020.100025>.
- 71 Biddle L, Jahn R, Perplies C, et al. [COVID-19 in collective accommodation centres for refugees: assessment of pandemic control measures and priorities from the perspective of authorities]. *Bundesgesundheitsblatt Gesundheitsforschung Gesundheitsschutz* 2021; **64**: 342–52. <https://doi.org/10.1007/s00103-021-03284-2>.
- 72 Da Mosto D, Bodini C, Mammà L, Gherardi G, Quargnolo M, Fantini MP. Health equity during COVID-19: A qualitative study on the consequences of the syndemic on refugees' and asylum seekers' health in reception centres in Bologna (Italy). *J Migr Health* 2021; **4**: 100057. <https://doi.org/10.1016/j.jmh.2021.100057>.
- 73 Mookerjee D, Chakravarty S, Roy S, Tagat A, Mukherjee S. A Culture-Centered Approach to Experiences of the Coronavirus Pandemic Lockdown Among Internal Migrants in India. *Am Behav Sci* 2021; **65**: 1426–44. <https://doi.org/10.1177/00027642211000392>.
- 74 de Diego-Cordero R, Tarriño-Concejero L, Lato-Molina MÁ, García-Carpintero Muñoz MÁ. COVID-19 and female immigrant caregivers in Spain: Cohabiting during lockdown. *European Journal of Women's Studies* 2022: 1. <https://doi.org/10.1177/13505068211017577>.
- 75 Duggal C, Ray S, Konantambigi R, Kothari A. The nowhere people: Lived experiences of migrant workers during Covid-19 in India. *Curr Psychol* 2021: 1–10. <https://doi.org/10.1007/s12144-021-02220-6>.
- 76 Elçi E, Kiriscioglu E, Üstübcü A. How Covid-19 financially hit urban refugees: evidence from mixed-method research with citizens and Syrian refugees in Turkey. *Disasters* 2021. <https://doi.org/10.1111/disa.12498>.
- 77 Enriquez LE, Rosales WE, Chavarria K, Hernandez MM, Valadez M. COVID on Campus: Assessing the Impact of the Pandemic on Undocumented College Students. *Aera Open* 2021; **7**: 19. <https://doi.org/10.1177/23328584211033576>.
- 78 European Centre for Disease Prevention and Control. Reducing COVID-19 transmission and strengthening vaccine uptake in migrants in the EU.
- 79 Knights F, Carter J, Deal A, Crawshaw AF, Hayward SE, Jones L, Hargreaves S. Impact of COVID-19 on migrants' access to primary care and implications for vaccine roll-out: a national qualitative study. *Br J Gen Pract* 2021; **71**: e583–e595. <https://doi.org/10.3399/BJGP.2021.0028>.
- 80 Filippi D, Giliberti L. Italian reception policies and pandemic: From exclusion to abandonment. *Dve Domovini* 2021; **54**: 131–42. <https://doi.org/10.3986/dd.2021.2.10>.
- 81 Geuijen PM, Vromans, Laura Embregts Petri J. C. M. A qualitative investigation of support workers' experiences of the impact of the COVID-19 pandemic on Dutch migrant families who have children with intellectual disabilities. *Journal of Intellectual & Developmental Disability* 2021: 1–6. <https://doi.org/10.3109/13668250.2021.1947210>.
- 82 Guruge S, Lamaj P, Lee C, et al. COVID-19 restrictions: experiences of immigrant parents in Toronto. *AIMS Public Health* 2021; **8**: 172–85. <https://doi.org/10.3934/publichealth.2021013>.
- 83 Hari A, Nardon L, Zhang H. A transnational lens into international student experiences of the COVID-19 pandemic 2021. <https://doi.org/10.1111/glob.12332>.

- 84 Im H, George N. Impacts of COVID-19 on Refugee Service Provision and Community Support: A Rapid Assessment during the Pandemic. *Soc Work Public Health* 2021: 1–20. <https://doi.org/10.1080/19371918.2021.1974639>.
- 85 Kaur-Gill S, Qin-Liang Y, Hassan S. Negotiating mental health during the COVID-19 pandemic: performing migrant domestic work in contentious conditions. (Special Issue: The COVID-19 pandemic: precarious migrants and outbreak inequality.). *American Behavioral Scientist* 2021; **65**: 1406–25. <https://doi.org/10.1177/00027642211000394>.
- 86 Kuhlmann E, Falkenbach M, Klasa K, Pavolini E, Ungureanu M-I. Migrant carers in Europe in times of COVID-19: a call to action for European health workforce governance and a public health approach. *Eur J Public Health* 2020; **30**: iv22-iv27. <https://doi.org/10.1093/eurpub/ckaa126>.
- 87 Kumar N, Uдах H, Francis A, Singh S, Wilson A. Indian Migrant Workers' Experience During the COVID-19 Pandemic Nationwide Lockdown. *Journal of Asian and African Studies* 2022: 00219096211046278-00219096211046278. <https://doi.org/10.1177/00219096211046278>.
- 88 Li, Tao Li Zhen Pan Yu Wang Xiaojie. Frangibility and potentiality: migrant worker families in China during COVID-19. *China Journal of Social Work* 2021: 1–33. <https://doi.org/10.1080/17525098.2021.1888765>.
- 89 Martin-Anatias N, Long NJ, Davies SG, et al. Lockdown ibuism: Experiences of Indonesian migrant mothers during the COVID-19 pandemic in aotearoa New Zealand. *Intersections (Australia)* 2021; **2021**: 1–13.
- 90 Martuscelli PN. How are forcibly displaced people affected by the COVID-19 pandemic outbreak? Evidence from Brazil. (Special Issue: The COVID-19 pandemic: precarious migrants and outbreak inequality.). *American Behavioral Scientist* 2021; **65**: 1342–64. <https://doi.org/10.1177/00027642211000402>.
- 91 Nasol K, Francisco-Menchavez V. Filipino home care workers: invisible frontline workers in the COVID-19 crisis in the United States. (Special Issue: The COVID-19 pandemic: precarious migrants and outbreak inequality.). *American Behavioral Scientist* 2021; **65**: 1365–83. <https://doi.org/10.1177/00027642211000410>.
- 92 Qi J, Ma C. Australia's crisis responses during COVID-19: The case of international students. *Journal of International Students* 2021; **11**: 94–111. <https://doi.org/10.32674/JIS.V11IS2.3578>.
- 93 Rao N, Narain N, Chakraborty S, Bhanjdeo A, Pattnaik A. Destinations Matter: Social Policy and Migrant Workers in the Times of Covid. *Eur J Dev Res* 2020: 1–23. <https://doi.org/10.1057/s41287-020-00326-4>.
- 94 Reynolds CW, Ramanathan V, Lorenzana E, et al. Challenges and Effects of the COVID-19 Pandemic on Asylum Seeker Health at the U.S.-Mexico Border. *Health Equity* 2021; **5**: 169–80. <https://doi.org/10.1089/heq.2020.0110>.
- 95 Sabar G, Babis D, Sabar Ben-Yehoshua N. From Fragility to Empowerment through Philanthropy: The Filipino Labor Migrant Community in Israel During COVID-19. *Journal of Immigrant & Refugee Studies* 2021: 1–16. <https://doi.org/10.1080/15562948.2021.1898074>.
- 96 Sanna J. The othering of returning migrants in Romania during the first wave of the COVID-19 pandemic: Event analysis. *Contemporary Southeastern Europe* 2021; **8**: 19–29. <https://doi.org/10.25364/02.8:2021.1.2>.
- 97 Santiago CD, Bustos Y, Jolie SA, et al. The impact of COVID-19 on immigrant and refugee families: Qualitative perspectives from newcomer students and parents. *Sch Psychol* 2021; **36**: 348–57. <https://doi.org/10.1037/spq0000448>.
- 98 Sanò G, Della Puppa F. The multiple facets of (im)mobility. A multisited ethnography on territorialisation experiences and mobility trajectories of asylum seekers and refugees outside the Italian reception system. *Journal of Modern Italian Studies* 2021: 1–17. <https://doi.org/10.1080/1354571x.2021.1943209>.
- 99 Singh GP, Arun P, Chavan BS. Migrant Workers' Needs and Perceptions While Lodged in a Shelter Home in India During the COVID-19 Pandemic. *Prim. care companion CNS disord. (Online)* 2020; **22**. <https://doi.org/10.4088/PCC.20m02753>.
- 100 Sohel MS, Hossain B, Sarker MNI, Horaira GA, Sifullah MK, Rahman MA. Impacts of COVID-19 induced food insecurity among informal migrants: Insight from Dhaka, Bangladesh. *Journal of Public Affairs* 2021; n/a: e2770-e2770. <https://doi.org/10.1002/pa.2770>.
- 101 Srivastava A, Arya YK, Joshi S, et al. Major Stressors and Coping Strategies of Internal Migrant Workers During the COVID-19 Pandemic: A Qualitative Exploration. *Front Psychol* 2021; **12**: 648334. <https://doi.org/10.3389/fpsyg.2021.648334>.
- 102 Tang S, Li X. Responding to the pandemic as a family unit: social impacts of COVID-19 on rural migrants in China and their coping strategies. *Humanities & Social Sciences Communications* 2021; **8**. <https://doi.org/10.1057/s41599-020-00686-6>.
- 103 Thomas J, de Wit EE, Radhakrishnan RK, Kulkarni N, Bunders-Aelen JG. Mitigating the COVID-19 pandemic in India: an in-depth exploration of challenges and opportunities for three vulnerable population groups. *Equality, Diversity and Inclusion* 2021. <https://doi.org/10.1108/EDI-09-2020-0264>.

- 104 Tosh SR, Berg UD, León KS. Migrant Detention and COVID-19: Pandemic Responses in Four New Jersey Detention Centers. *Journal on Migration and Human Security* 2021; 23315024211003855-23315024211003855. <https://doi.org/10.1177/23315024211003855>.
- 105 B.C. UB, Pokharel S, Munikar S, Wagle CN, Adhikary P, Shahi BB, Thapa C, Bhandari RP, Adhikari B, Thapa K. Anxiety and depression among people living in quarantine centers during COVID-19 pandemic: A mixed method study from western Nepal. *PLoS one* 2021; **16**: e0254126. <https://doi.org/10.1371/journal.pone.0254126>.
- 106 Bauza V, Sclar GD, Bisoyi A, Owens A, Ghugey A, Clasen T. Experience of the COVID-19 Pandemic in Rural Odisha, India: Knowledge, Preventative Actions, and Impacts on Daily Life. *Int J Environ Res Public Health* 2021; **18**: 2863. <https://doi.org/10.3390/ijerph18062863>.
- 107 Zambrano-Barragán P, Ramírez Hernández S, Freier LF, et al. The impact of COVID-19 on Venezuelan migrants' access to health: A qualitative study in Colombian and Peruvian cities. *J Migr Health* 2021; **3**: 100029. <https://doi.org/10.1016/j.jmh.2020.100029>.
- 108 Yee K, Peh HP, Tan YP, et al. Stressors and coping strategies of migrant workers diagnosed with COVID-19 in Singapore: a qualitative study. *BMJ open* 2021; **11**: e045949-e045949. <https://doi.org/10.1136/bmjopen-2020-045949>.
- 109 Lui ID, Vandan N, Davies SE, et al. "We also deserve help during the pandemic": The effect of the COVID-19 pandemic on foreign domestic workers in Hong Kong. *J Migr Health* 2021; **3**: 100037. <https://doi.org/10.1016/j.jmh.2021.100037>.
- 110 Kraft KB, Elgersma I, Lyngstad TM, Elstrøm P, Telle K. COVID-19 vaccination rates among healthcare workers by immigrant background: A nation-wide registry study from Norway. *Scand J Public Health* 2022; 14034948221100685. <https://doi.org/10.1177/14034948221100685>.
- 111 Kassa SM, Njagarah JBH, Terefe YA. Modelling Covid-19 mitigation and control strategies in the presence of migration and vaccination: the case of South Africa. *Afrika Matematika* 2021. <https://doi.org/10.1007/s13370-021-00900-x>.
- 112 Inghammar M, Moghaddassi M, Rasmussen M, Malmqvist U, Kahn F, Bjork J. [preprint] COVID-19 vaccine uptake among older people in relation to sociodemographic factors: cohort results from southern Sweden 2021. <https://medrxiv.org/cgi/content/short/2021.08.12.21261981>.
- 113 Suphanchaimat R, Tuangratananon T, Rajatanavin N, Phaiyrom M, Jaruwanno W, Uansri S. Prioritization of the Target Population for Coronavirus Disease 2019 (COVID-19) Vaccination Program in Thailand. *Int. j. environ. res. public health (Online)* 2021; **18**. <https://doi.org/10.3390/ijerph182010803>.
- 114 Song S, Zang S, Gong L, et al. Willingness and uptake of the COVID-19 testing and vaccination in urban China during the low-risk period: a cross-sectional study. *BMC Public Health* 2022; **22**: 556. <https://doi.org/10.1186/s12889-022-12969-5>.
- 115 Irizar P, Pan D, Kapadia D, et al. Ethnic inequalities in COVID-19 infection, hospitalisation, intensive care admission, and death: a global systematic review and meta-analysis of over 200 million study participants. *Eclinicalmedicine* 2023; **57**: 101877. <https://doi.org/10.1016/j.eclinm.2023.101877>.
- 116 Horton R. Offline: COVID-19 is not a pandemic. *The Lancet* 2020; **396**: 874.
- 117 Willen SS, Knipper M, Abadía-Barrero CE, Davidovitch N. Syndemic vulnerability and the right to health. *Lancet [Internet]* 2017; [cited 2017 Aug 6]; 389 (10072): 964-77.
- 118 Anderson B, Poeschel F, Ruhs M. Rethinking labour migration: Covid-19, essential work, and systemic resilience. *Comp Migr Stud* 2021; **9**: 45. <https://doi.org/10.1186/s40878-021-00252-2>.
- 119 The Guardian. Migrant fruit pickers charged thousands in illegal fees to work on UK farms, investigation shows, 2022.
- 120 Flynn MA, Wickramage K. Leveraging the Domain of Work to Improve Migrant Health. *Int J Environ Res Public Health* 2017; **14**. <https://doi.org/10.3390/ijerph14101248>.
- 121 Karanikolos M, McKee M. How comparable is COVID-19 mortality across countries? *Eurohealth* 2020.
- 122 Bozorgmehr K, Biddle L, Rohleder S, Puthoopparambil SJ, Jahn R. What is the evidence on availability and integration of refugee and migrant health data in health information systems in the WHO European Region? World Health Organization. Regional Office for Europe, 2019.
- 123 World Health Organization. Collection and integration of data on refugee and migrant health in the WHO European Region: technical guidance. 92890553 2020.
- 124 Wickramage K, Annunziata G. Advancing health in migration governance, and migration in health governance. *The Lancet* 2018; **392**: 2528–30.

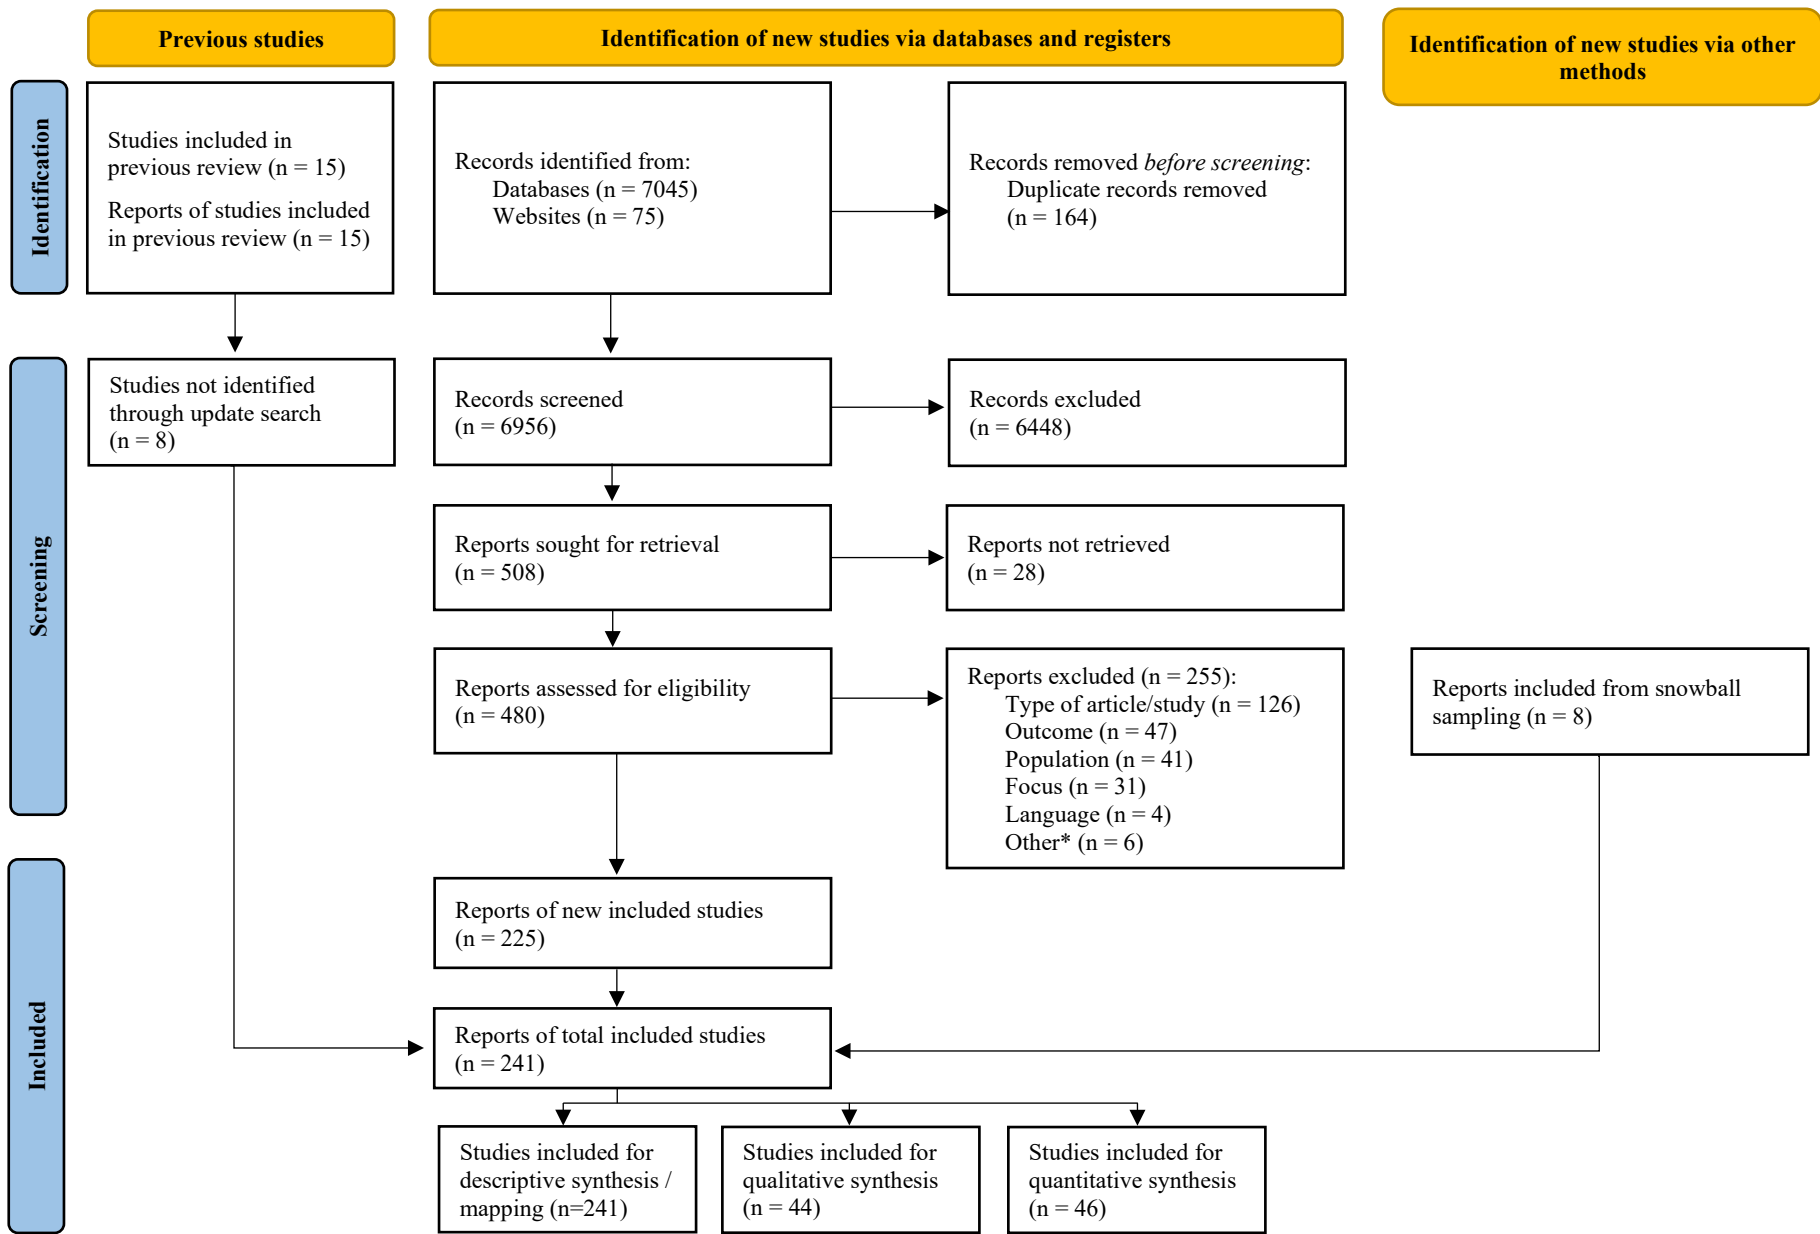

\*: Other reasons include unspecific pandemic measures (e.g. “the pandemic”), knowledge attitudes and practice focudes articles, and one study was withdrawn

From: Page MJ, McKenzie JE, Bossuyt PM, Boutron I, Hoffmann TC, Mulrow CD, et al. The PRISMA 2020 statement: an updated guideline for reporting systematic reviews. *BMJ* 2021;372:n71. doi: 10.1136/bmj.n71.

### A) Risk ratio (RR) of Covid-19 cases

| Author (geographic region)             | Migrants |                | Non-Migrants |                 | Risk Ratio | RR          | 95%-CI              | Weight        |
|----------------------------------------|----------|----------------|--------------|-----------------|------------|-------------|---------------------|---------------|
|                                        | Events   | Population     | Events       | Population      |            |             |                     |               |
| Ngiam et al. (Asia)                    | 425      | 554            | 100          | 554             |            | 4.25        | [3.54; 5.10]        | 4.9%          |
| Johnson-Agbakwu et al. (North America) | 8        | 45             | 25           | 305             |            | 2.17        | [1.04; 4.51]        | 3.0%          |
| Wiedmeyer et al. (North America)       | 47259    | 1126304        | 88646        | 4146593         |            | 1.96        | [1.94; 1.98]        | 5.1%          |
| Otto et al. (North America)            | 113      | 596            | 1171         | 9542            |            | 1.54        | [1.30; 1.84]        | 4.9%          |
| Casanova et al. (North America)        | 2942     | 16166          | 351717       | 9979856         |            | 5.16        | [5.00; 5.34]        | 5.1%          |
| Zlot et al. (North America)            | 40       | 249            | 91           | 2083            |            | 3.68        | [2.60; 5.21]        | 4.4%          |
| Kjollesdal & Magnusson (North Europe)  | 26547    | 90585          | 490872       | 2639042         |            | 1.58        | [1.56; 1.59]        | 5.1%          |
| Kjollesdal et al. (North Europe)       | 9434     | 715238         | 16416        | 3656036         |            | 2.94        | [2.86; 3.01]        | 5.1%          |
| Holmberg et al. (North Europe)         | 845      | 8228           | 3160         | 110072          |            | 3.58        | [3.33; 3.85]        | 5.0%          |
| Methi et al. (North Europe)            | 12827    | 193654         | 14903        | 528101          |            | 2.35        | [2.29; 2.40]        | 5.1%          |
| Brinkmann et al. (North Europe)        | 36       | 816            | 20           | 1257            |            | 2.77        | [1.62; 4.76]        | 3.7%          |
| Labberton et al. 1 (North Europe)      | 28642    | 912043         | 53890        | 4582626         |            | 2.67        | [2.63; 2.71]        | 5.1%          |
| Labberton et al. 2 (North Europe)      | 9575     | 199518         | 44315        | 4383108         |            | 4.75        | [4.65; 4.85]        | 5.1%          |
| Kondilis et al. (South Europe)         | 1106     | 56221          | 77553        | 10816286        |            | 2.74        | [2.59; 2.91]        | 5.0%          |
| Mallet et al. (South Europe)           | 73       | 335            | 67           | 836             |            | 2.72        | [2.00; 3.69]        | 4.5%          |
| Pagani et al. (South Europe)           | 13       | 472            | 14           | 1572            |            | 3.09        | [1.46; 6.53]        | 3.0%          |
| Guijarro et al. (South Europe)         | 179      | 20301          | 856          | 131599          |            | 1.36        | [1.15; 1.59]        | 4.9%          |
| Marco et al. (South Europe)            | 15       | 153            | 6            | 64              |            | 1.05        | [0.42; 2.57]        | 2.5%          |
| D'Ambrosi et al. (South Europe)        | 56       | 902            | 22           | 629             |            | 1.78        | [1.10; 2.88]        | 3.9%          |
| Jaqueti Aroca et al. (South Europe)    | 136      | 259            | 782          | 1522            |            | 1.02        | [0.90; 1.16]        | 5.0%          |
| Warszawski et al. 1 (South Europe)     | 83       | 951            | 612          | 9769            |            | 1.39        | [1.12; 1.73]        | 4.8%          |
| Warszawski et al. 2 (South Europe)     | 291      | 3337           | 3172         | 54296           |            | 1.49        | [1.33; 1.67]        | 5.0%          |
| <b>Random effects model</b>            |          | <b>3346927</b> |              | <b>41055748</b> |            | <b>2.33</b> | <b>[1.88; 2.89]</b> | <b>100.0%</b> |
| <b>Prediction interval</b>             |          |                |              |                 |            |             | <b>[0.88; 6.16]</b> |               |

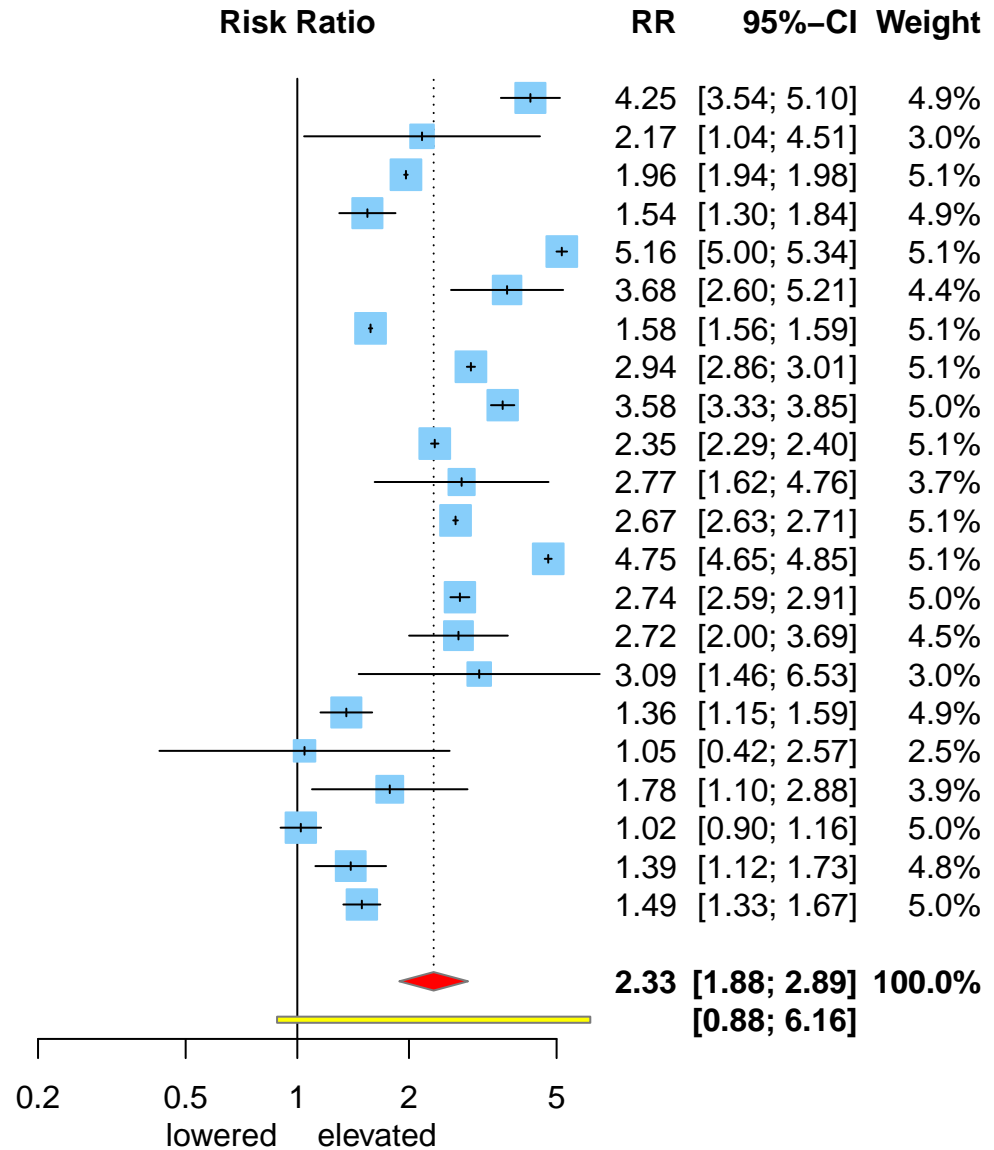

Heterogeneity:  $I^2 = 100\%$ ,  $\tau^2 = 0.2056$  [0.1116; 0.4216],  $\chi^2_{21} = 13606.90$  ( $p = 0$ )  
 Test for overall effect:  $t_{20.2} = 8.27$  ( $p < 0.01$ )

### B) Risk difference (RD) of Covid-19 cases

| Author (geographic region)             | Migrants |                | Non-Migrants |                 | Risk Difference | RD          | 95%-CI               | Weight        |
|----------------------------------------|----------|----------------|--------------|-----------------|-----------------|-------------|----------------------|---------------|
|                                        | Events   | Population     | Events       | Population      |                 |             |                      |               |
| Ngiam et al. (Asia)                    | 425      | 554            | 100          | 554             |                 | 0.59        | [0.54; 0.63]         | 4.5%          |
| Johnson-Agbakwu et al. (North America) | 8        | 45             | 25           | 305             |                 | 0.10        | [-0.02; 0.21]        | 3.8%          |
| Wiedmeyer et al. (North America)       | 47259    | 1126304        | 88646        | 4146593         |                 | 0.02        | [0.02; 0.02]         | 4.7%          |
| Otto et al. (North America)            | 113      | 596            | 1171         | 9542            |                 | 0.07        | [0.03; 0.10]         | 4.6%          |
| Casanova et al. (North America)        | 2942     | 16166          | 351717       | 9979856         |                 | 0.15        | [0.14; 0.15]         | 4.7%          |
| Zlot et al. (North America)            | 40       | 249            | 91           | 2083            |                 | 0.12        | [0.07; 0.16]         | 4.5%          |
| Kjollesdal & Magnusson (North Europe)  | 26547    | 90585          | 490872       | 2639042         |                 | 0.11        | [0.10; 0.11]         | 4.7%          |
| Kjollesdal et al. (North Europe)       | 9434     | 715238         | 16416        | 3656036         |                 | 0.01        | [0.01; 0.01]         | 4.7%          |
| Holmberg et al. (North Europe)         | 845      | 8228           | 3160         | 110072          |                 | 0.07        | [0.07; 0.08]         | 4.7%          |
| Methi et al. (North Europe)            | 12827    | 193654         | 14903        | 528101          |                 | 0.04        | [0.04; 0.04]         | 4.7%          |
| Brinkmann et al. (North Europe)        | 36       | 816            | 20           | 1257            |                 | 0.03        | [0.01; 0.04]         | 4.6%          |
| Labberton et al. 1 (North Europe)      | 28642    | 912043         | 53890        | 4582626         |                 | 0.02        | [0.02; 0.02]         | 4.7%          |
| Labberton et al. 2 (North Europe)      | 9575     | 199518         | 44315        | 4383108         |                 | 0.04        | [0.04; 0.04]         | 4.7%          |
| Kondilis et al. (South Europe)         | 1106     | 56221          | 77553        | 10816286        |                 | 0.01        | [0.01; 0.01]         | 4.7%          |
| Mallet et al. (South Europe)           | 73       | 335            | 67           | 836             |                 | 0.14        | [0.09; 0.19]         | 4.5%          |
| Pagani et al. (South Europe)           | 13       | 472            | 14           | 1572            |                 | 0.02        | [0.00; 0.03]         | 4.6%          |
| Guijarro et al. (South Europe)         | 179      | 20301          | 856          | 131599          |                 | 0.00        | [0.00; 0.00]         | 4.7%          |
| Marco et al. (South Europe)            | 15       | 153            | 6            | 64              |                 | 0.00        | [-0.08; 0.09]        | 4.1%          |
| D'Ambrosi et al. (South Europe)        | 56       | 902            | 22           | 629             |                 | 0.03        | [0.01; 0.05]         | 4.6%          |
| Jaqueti Aroca et al. (South Europe)    | 136      | 259            | 782          | 1522            |                 | 0.01        | [-0.05; 0.08]        | 4.3%          |
| Warszawski et al. 1 (South Europe)     | 83       | 951            | 612          | 9769            |                 | 0.02        | [0.01; 0.04]         | 4.6%          |
| Warszawski et al. 2 (South Europe)     | 291      | 3337           | 3172         | 54296           |                 | 0.03        | [0.02; 0.04]         | 4.7%          |
| <b>Random effects model</b>            |          | <b>3346927</b> |              | <b>41055748</b> |                 | <b>0.07</b> | <b>[0.02; 0.13]</b>  | <b>100.0%</b> |
| <b>Prediction interval</b>             |          |                |              |                 |                 |             | <b>[-0.18; 0.33]</b> |               |

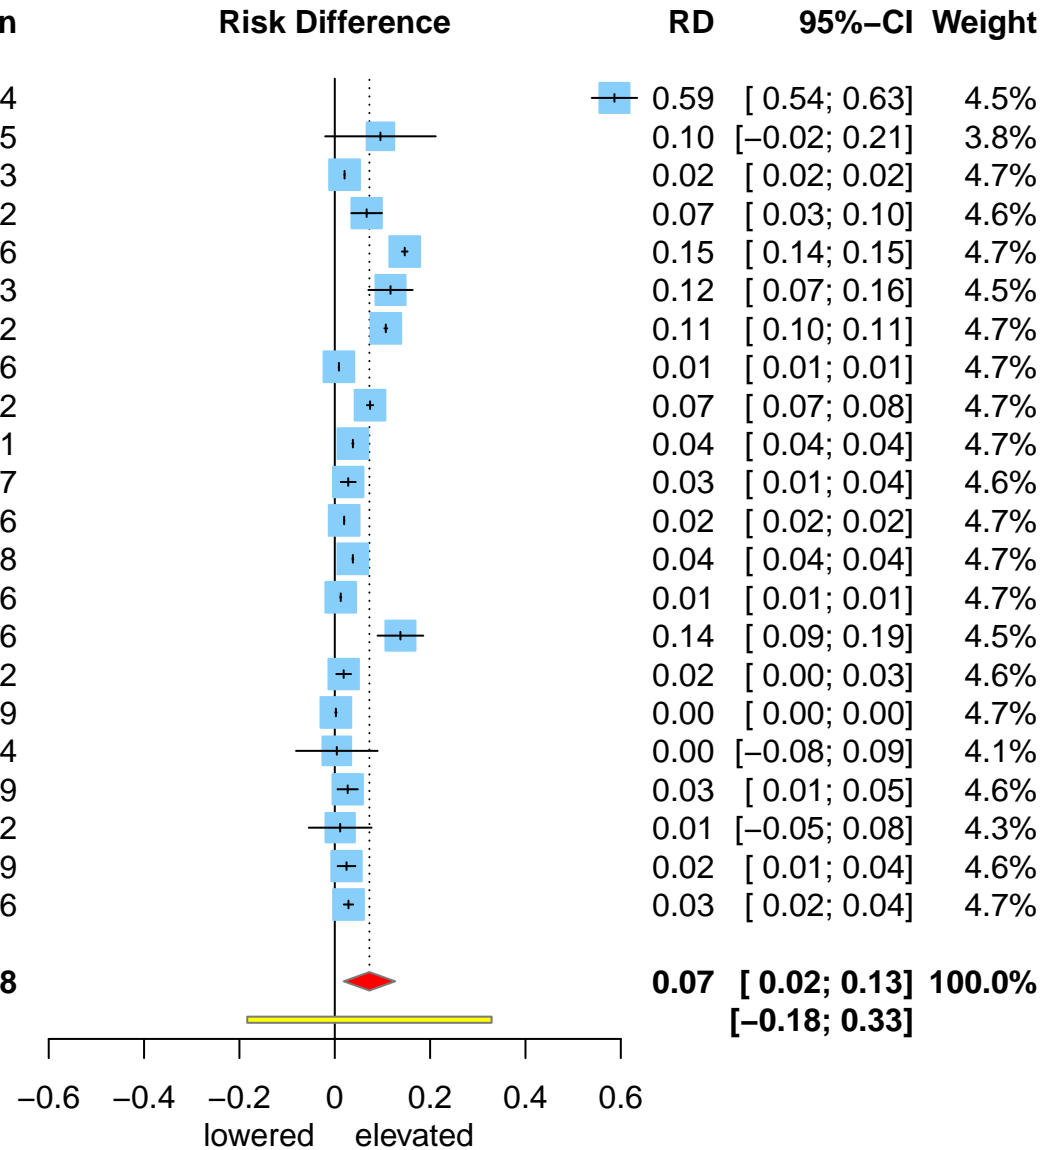

Heterogeneity:  $I^2 = 100\%$ ,  $\tau^2 = 0.0144$  [0.0084; 0.0303],  $\chi^2_{21} = 13733.18$  ( $p = 0$ )  
 Test for overall effect:  $t_{20.9} = 2.80$  ( $p = 0.01$ )



### A) Risk ratio (RR) of Covid-19 cases

| Author                                                                               | Migrants       |            | Non-Migrants    |            |
|--------------------------------------------------------------------------------------|----------------|------------|-----------------|------------|
|                                                                                      | Events         | Population | Events          | Population |
| <b>Geographical regions: North America</b>                                           |                |            |                 |            |
| Johnson-Agbakwu et al.                                                               | 8              | 45         | 25              | 305        |
| Wiedmeyer et al.                                                                     | 47259          | 1126304    | 88646           | 4146593    |
| Otto et al.                                                                          | 113            | 596        | 1171            | 9542       |
| Casanova et al.                                                                      | 2942           | 16166      | 351717          | 9979856    |
| Zlot et al.                                                                          | 40             | 249        | 91              | 2083       |
| <b>Random effects model</b>                                                          | <b>1143360</b> |            | <b>14138379</b> |            |
| <b>Prediction interval</b>                                                           |                |            |                 |            |
| Heterogeneity: $I^2 = 100\%$ , $\tau^2 = 0.2539$ , $\chi^2_4 = 3021.42$ ( $p = 0$ )  |                |            |                 |            |
| <b>Geographical regions: North Europe</b>                                            |                |            |                 |            |
| Kjollesdal & Magnusson                                                               | 26547          | 90585      | 490872          | 2639042    |
| Kjollesdal et al.                                                                    | 9434           | 715238     | 16416           | 3656036    |
| Holmberg et al.                                                                      | 845            | 8228       | 3160            | 110072     |
| Methi et al.                                                                         | 12827          | 193654     | 14903           | 528101     |
| Brinkmann et al.                                                                     | 36             | 816        | 20              | 1257       |
| Labberton et al. 1                                                                   | 28642          | 912043     | 53890           | 4582626    |
| Labberton et al. 2                                                                   | 9575           | 199518     | 44315           | 4383108    |
| <b>Random effects model</b>                                                          | <b>2120082</b> |            | <b>15900242</b> |            |
| <b>Prediction interval</b>                                                           |                |            |                 |            |
| Heterogeneity: $I^2 = 100\%$ , $\tau^2 = 0.1245$ , $\chi^2_6 = 10217.55$ ( $p = 0$ ) |                |            |                 |            |
| <b>Geographical regions: South Europe</b>                                            |                |            |                 |            |
| Kondilis et al.                                                                      | 1106           | 56221      | 77553           | 10816286   |
| Mallet et al.                                                                        | 73             | 335        | 67              | 836        |
| Pagani et al.                                                                        | 13             | 472        | 14              | 1572       |
| Guijarro et al.                                                                      | 179            | 20301      | 856             | 131599     |
| Marco et al.                                                                         | 15             | 153        | 6               | 64         |
| D'Ambrosi et al.                                                                     | 56             | 902        | 22              | 629        |
| Jaqueti Aroca et al.                                                                 | 136            | 259        | 782             | 1522       |
| Warszawski et al. 1                                                                  | 83             | 951        | 612             | 9769       |
| Warszawski et al. 2                                                                  | 291            | 3337       | 3172            | 54296      |
| <b>Random effects model</b>                                                          | <b>82931</b>   |            | <b>11016573</b> |            |
| <b>Prediction interval</b>                                                           |                |            |                 |            |
| Heterogeneity: $I^2 = 97\%$ , $\tau^2 = 0.1324$ , $\chi^2_8 = 285.71$ ( $p < 0.01$ ) |                |            |                 |            |
| <b>Geographical regions: Asia</b>                                                    |                |            |                 |            |
| Ngiam et al.                                                                         | 425            | 554        | 100             | 554        |
| <b>Prediction interval</b>                                                           |                |            |                 |            |
| <b>Random effects model</b>                                                          | <b>3346927</b> |            | <b>41055748</b> |            |
| <b>Prediction interval</b>                                                           |                |            |                 |            |

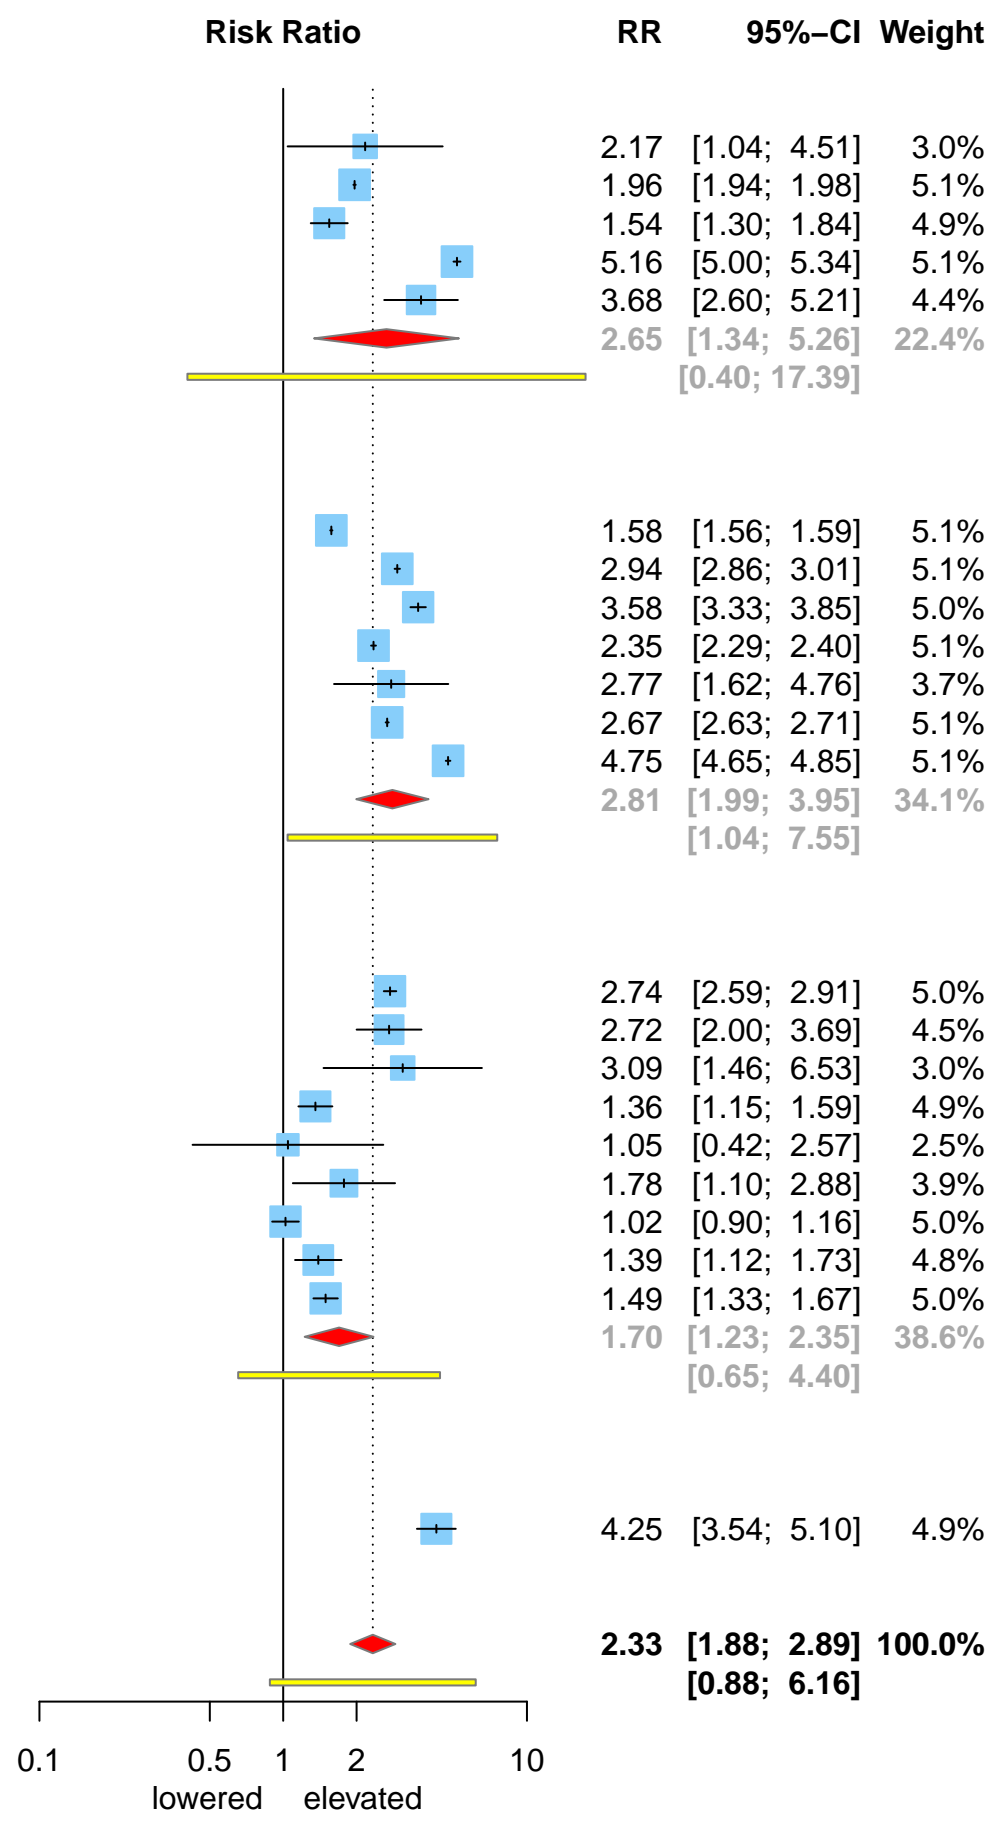

Heterogeneity:  $I^2 = 100\%$ ,  $\tau^2 = 0.2056$  [0.1116; 0.4216],  $\chi^2_{21} = 13606.90$  ( $p = 0$ )  
 Test for overall effect:  $t_{20.2} = 8.27$  ( $p < 0.01$ )  
 Test for subgroup differences:  $\chi^2_3 = 31.59$ ,  $df = 3$  ( $p < 0.01$ )

### B) Risk difference (RD) of Covid-19 cases

| Author                                                                               | Migrants       |            | Non-Migrants    |            |
|--------------------------------------------------------------------------------------|----------------|------------|-----------------|------------|
|                                                                                      | Events         | Population | Events          | Population |
| <b>Geographical regions: North America</b>                                           |                |            |                 |            |
| Johnson-Agbakwu et al.                                                               | 8              | 45         | 25              | 305        |
| Wiedmeyer et al.                                                                     | 47259          | 1126304    | 88646           | 4146593    |
| Otto et al.                                                                          | 113            | 596        | 1171            | 9542       |
| Casanova et al.                                                                      | 2942           | 16166      | 351717          | 9979856    |
| Zlot et al.                                                                          | 40             | 249        | 91              | 2083       |
| <b>Random effects model</b>                                                          | <b>1143360</b> |            | <b>14138379</b> |            |
| <b>Prediction interval</b>                                                           |                |            |                 |            |
| Heterogeneity: $I^2 = 100\%$ , $\tau^2 = 0.0027$ , $\chi^2_4 = 1745.95$ ( $p = 0$ )  |                |            |                 |            |
| <b>Geographical regions: North Europe</b>                                            |                |            |                 |            |
| Kjollesdal & Magnusson                                                               | 26547          | 90585      | 490872          | 2639042    |
| Kjollesdal et al.                                                                    | 9434           | 715238     | 16416           | 3656036    |
| Holmberg et al.                                                                      | 845            | 8228       | 3160            | 110072     |
| Methi et al.                                                                         | 12827          | 193654     | 14903           | 528101     |
| Brinkmann et al.                                                                     | 36             | 816        | 20              | 1257       |
| Labberton et al. 1                                                                   | 28642          | 912043     | 53890           | 4582626    |
| Labberton et al. 2                                                                   | 9575           | 199518     | 44315           | 4383108    |
| <b>Random effects model</b>                                                          | <b>2120082</b> |            | <b>15900242</b> |            |
| <b>Prediction interval</b>                                                           |                |            |                 |            |
| Heterogeneity: $I^2 = 100\%$ , $\tau^2 = 0.0012$ , $\chi^2_6 = 10255.21$ ( $p = 0$ ) |                |            |                 |            |
| <b>Geographical regions: South Europe</b>                                            |                |            |                 |            |
| Kondilis et al.                                                                      | 1106           | 56221      | 77553           | 10816286   |
| Mallet et al.                                                                        | 73             | 335        | 67              | 836        |
| Pagani et al.                                                                        | 13             | 472        | 14              | 1572       |
| Guijarro et al.                                                                      | 179            | 20301      | 856             | 131599     |
| Marco et al.                                                                         | 15             | 153        | 6               | 64         |
| D'Ambrosi et al.                                                                     | 56             | 902        | 22              | 629        |
| Jaqueti Aroca et al.                                                                 | 136            | 259        | 782             | 1522       |
| Warszawski et al. 1                                                                  | 83             | 951        | 612             | 9769       |
| Warszawski et al. 2                                                                  | 291            | 3337       | 3172            | 54296      |
| <b>Random effects model</b>                                                          | <b>82931</b>   |            | <b>11016573</b> |            |
| <b>Prediction interval</b>                                                           |                |            |                 |            |
| Heterogeneity: $I^2 = 96\%$ , $\tau^2 = 0.0009$ , $\chi^2_8 = 178.44$ ( $p < 0.01$ ) |                |            |                 |            |
| <b>Geographical regions: Asia</b>                                                    |                |            |                 |            |
| Ngiam et al.                                                                         | 425            | 554        | 100             | 554        |
| <b>Prediction interval</b>                                                           |                |            |                 |            |
| <b>Random effects model</b>                                                          | <b>3346927</b> |            | <b>41055748</b> |            |
| <b>Prediction interval</b>                                                           |                |            |                 |            |

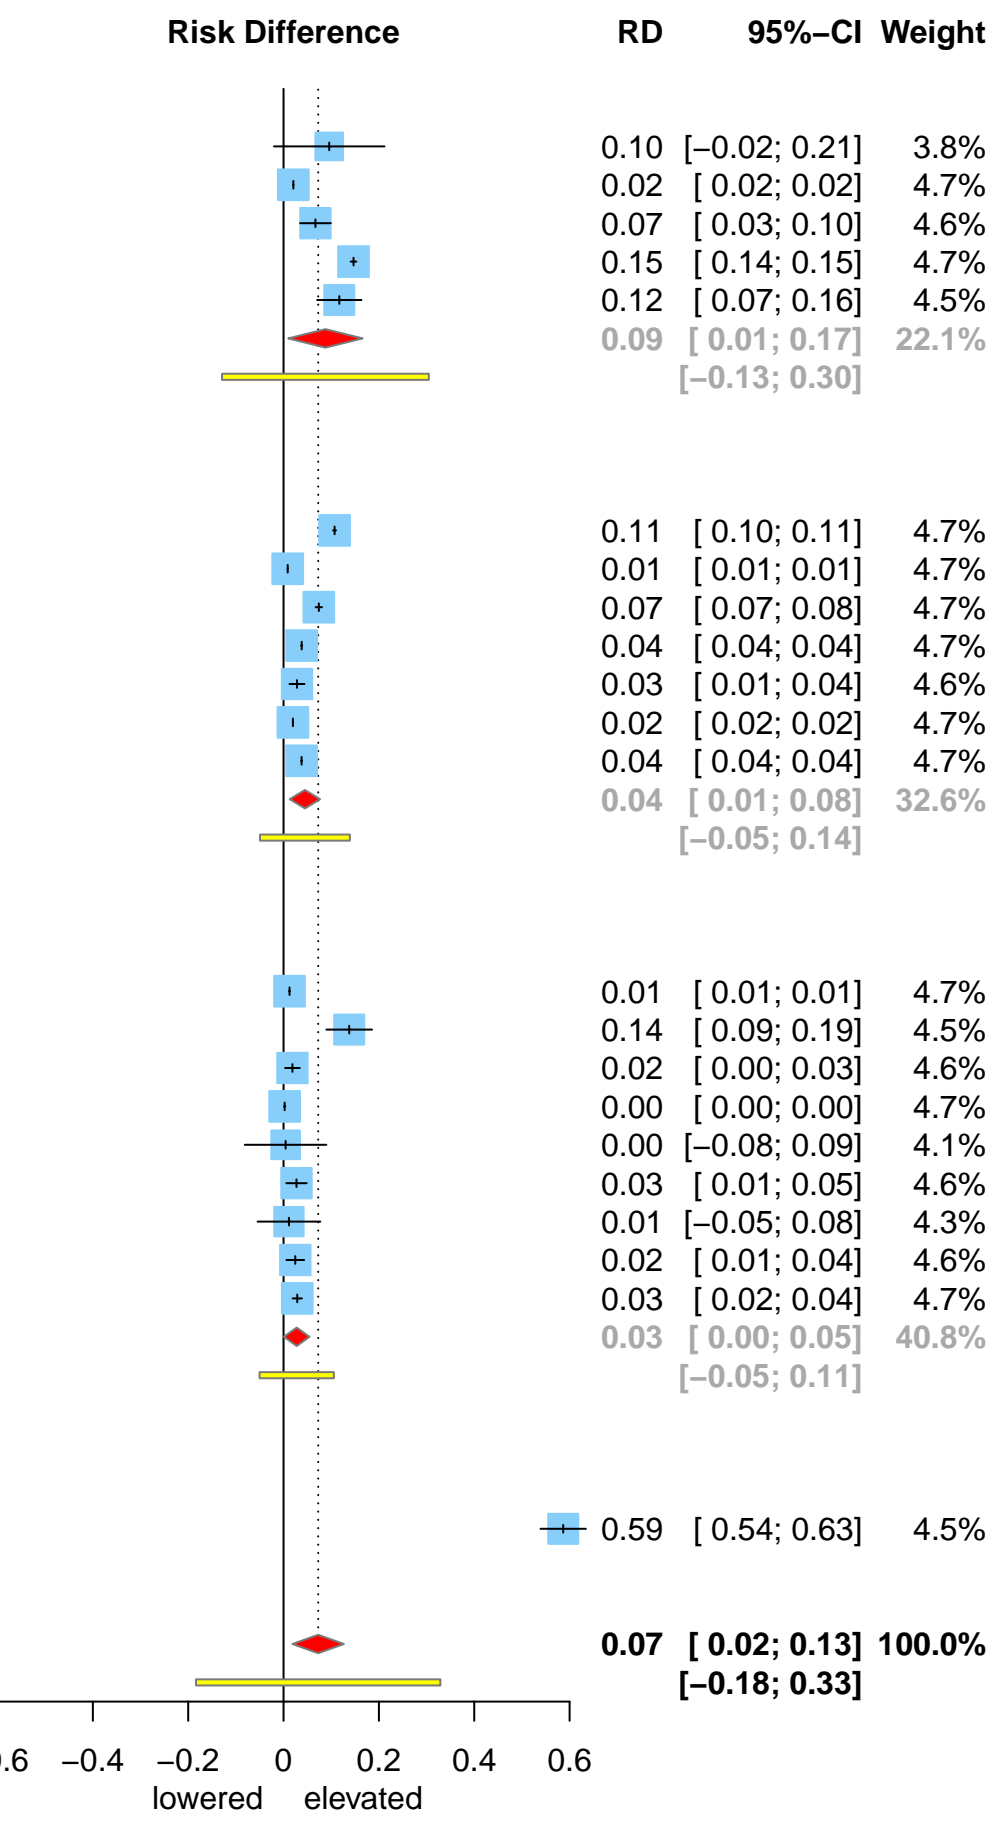

Heterogeneity:  $I^2 = 100\%$ ,  $\tau^2 = 0.0144$  [0.0084; 0.0303],  $\chi^2_{21} = 13733.18$  ( $p = 0$ )  
 Test for overall effect:  $t_{20.9} = 2.80$  ( $p = 0.01$ )  
 Test for subgroup differences:  $\chi^2_3 = 461.10$ ,  $df = 3$  ( $p < 0.01$ )

### A) Risk ratio (RR) of Covid-19 related hospitalisations

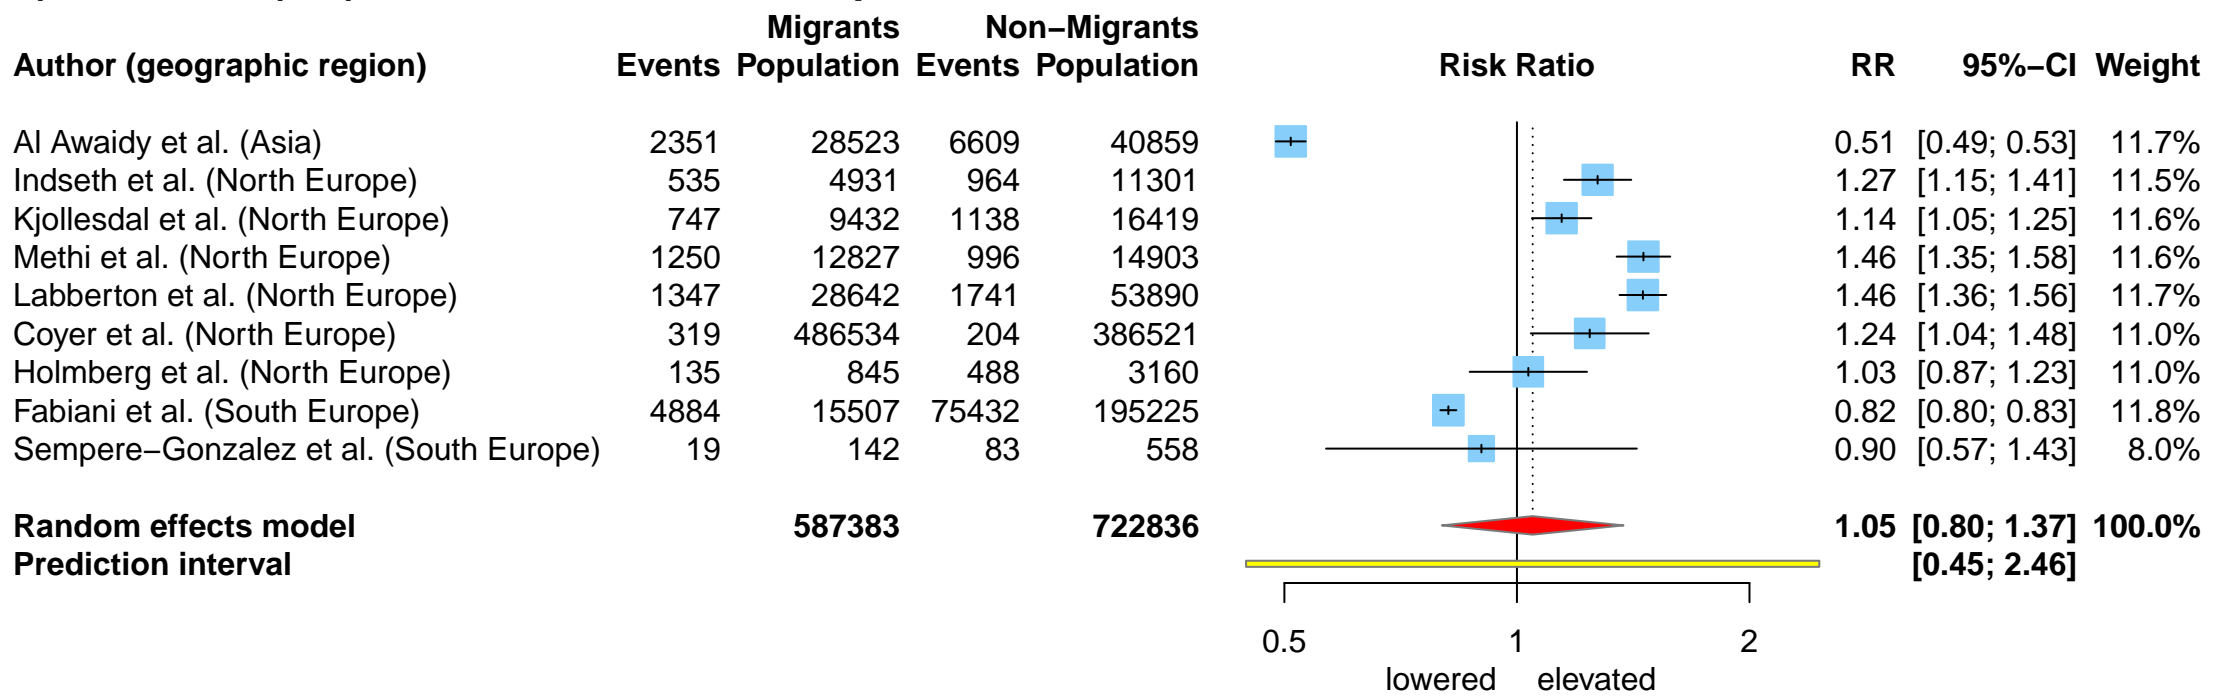

Heterogeneity:  $I^2 = 99\%$ ,  $\tau^2 = 0.1155$  [0.0494; 0.4094],  $\chi^2_8 = 1048.42$  ( $p < 0.01$ )  
 Test for overall effect:  $t_{7.8} = 0.40$  ( $p = 0.70$ )

### B) Risk difference (RD) of Covid-19 related hospitalisations

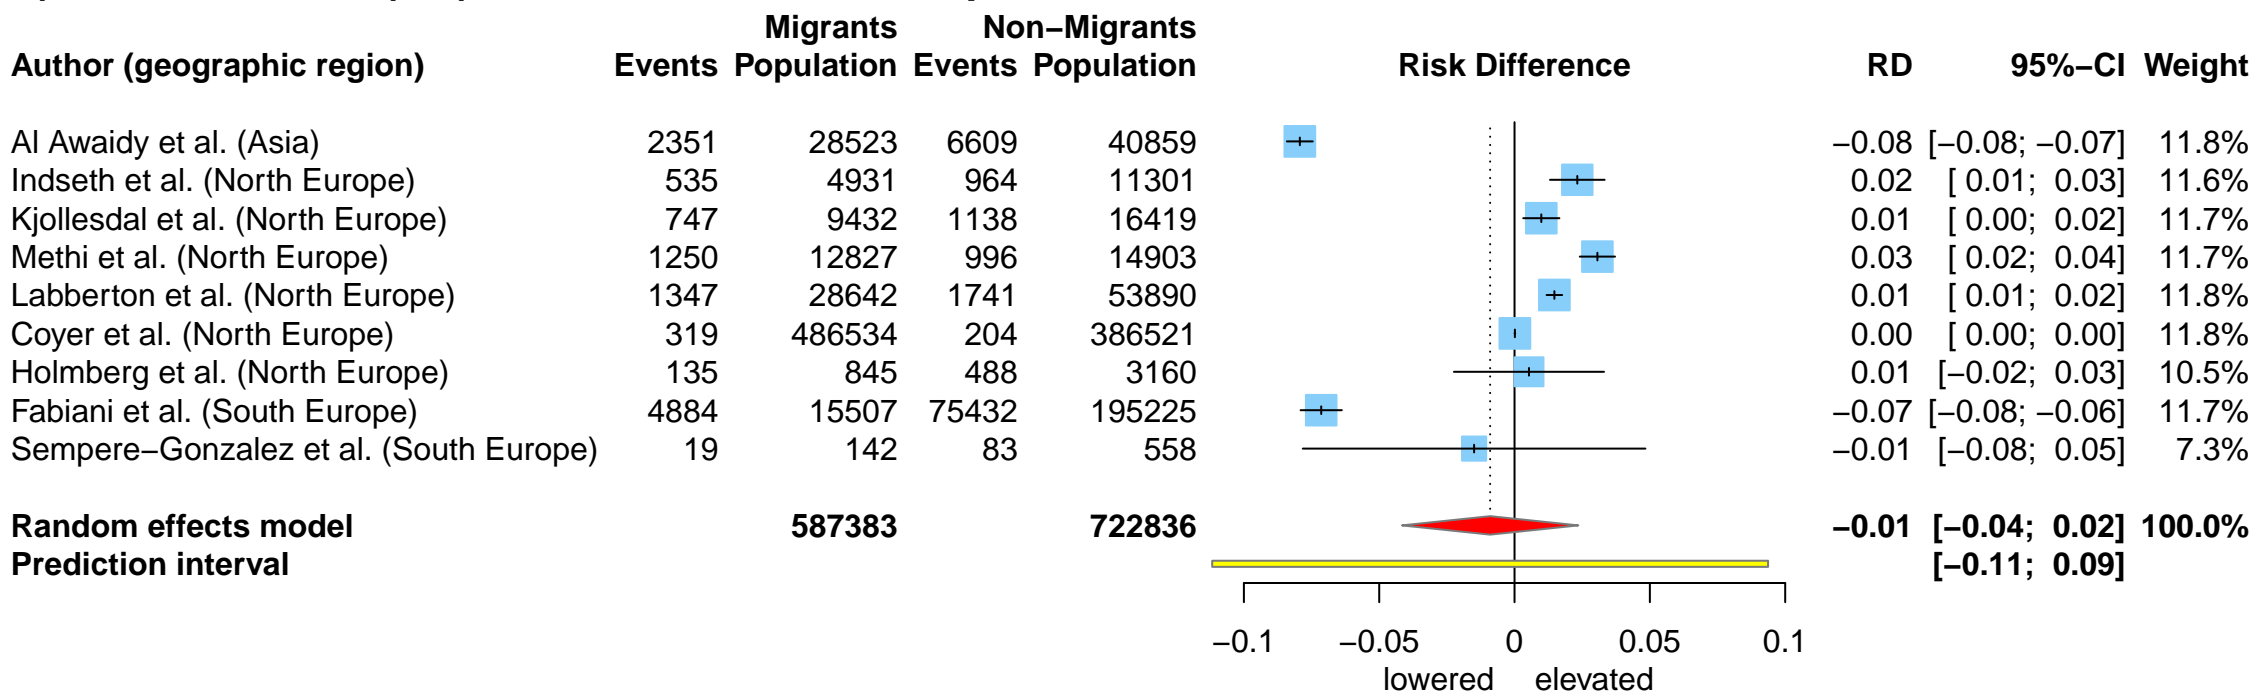

Heterogeneity:  $I^2 = 100\%$ ,  $\tau^2 = 0.0017$  [0.0008; 0.0058],  $\chi^2_8 = 1607.91$  ( $p = 0$ )  
 Test for overall effect:  $t_{7.7} = -0.64$  ( $p = 0.54$ )

### A) Risk ratio (RR) of Covid-19 cases in ICUs

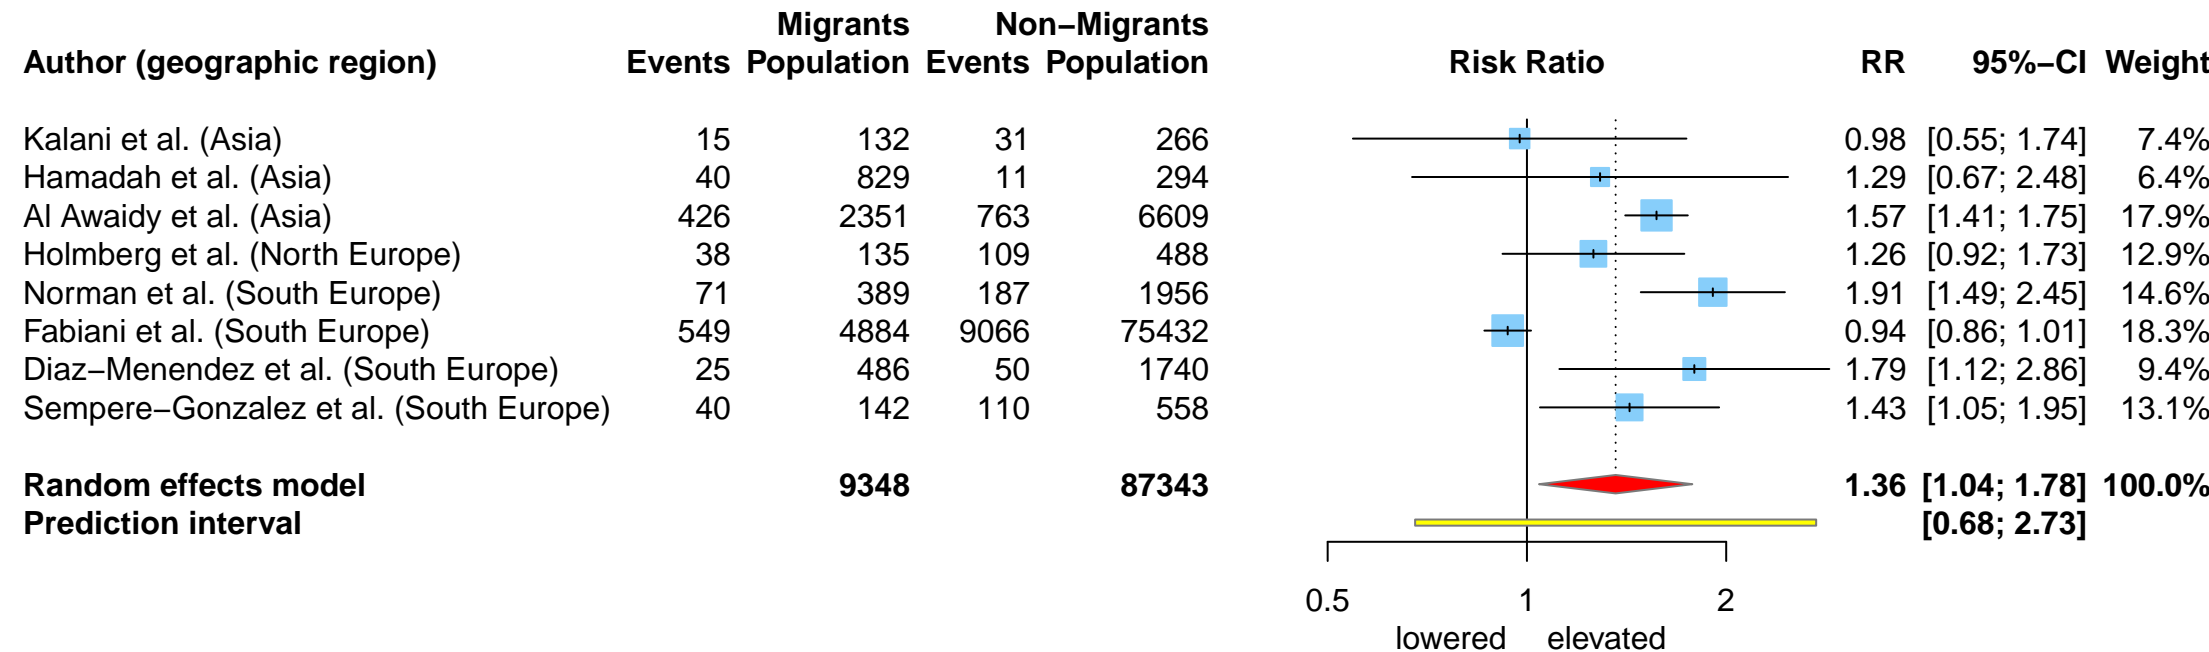

Heterogeneity:  $I^2 = 91\%$ ,  $\tau^2 = 0.0570$  [0.0142; 0.2486],  $\chi^2_7 = 77.22$  ( $p < 0.01$ )  
 Test for overall effect:  $t_{5,4} = 2.90$  ( $p = 0.03$ )

### B) Risk difference (RD) of Covid-19 cases in ICUs

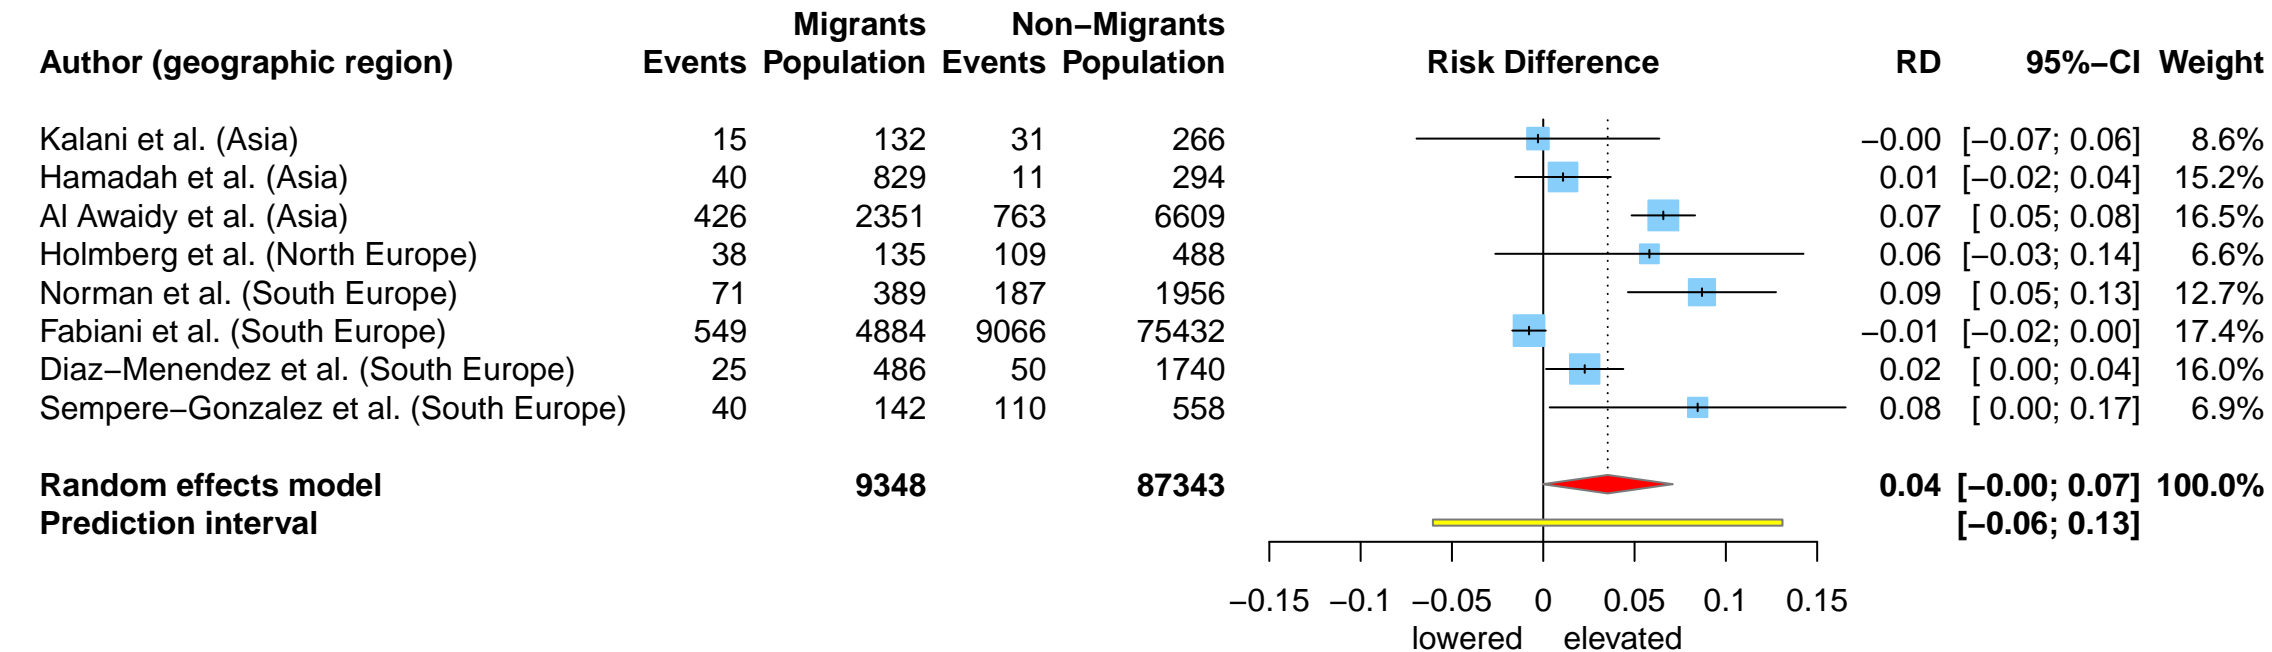

Heterogeneity:  $I^2 = 90\%$ ,  $\tau^2 = 0.0011$  [0.0003; 0.0056],  $\chi^2_7 = 73.12$  ( $p < 0.01$ )  
 Test for overall effect:  $t_{5,5} = 2.48$  ( $p = 0.05$ )

### A) Risk ratio (RR) of Covid-19 associated deaths of hospitalised cases

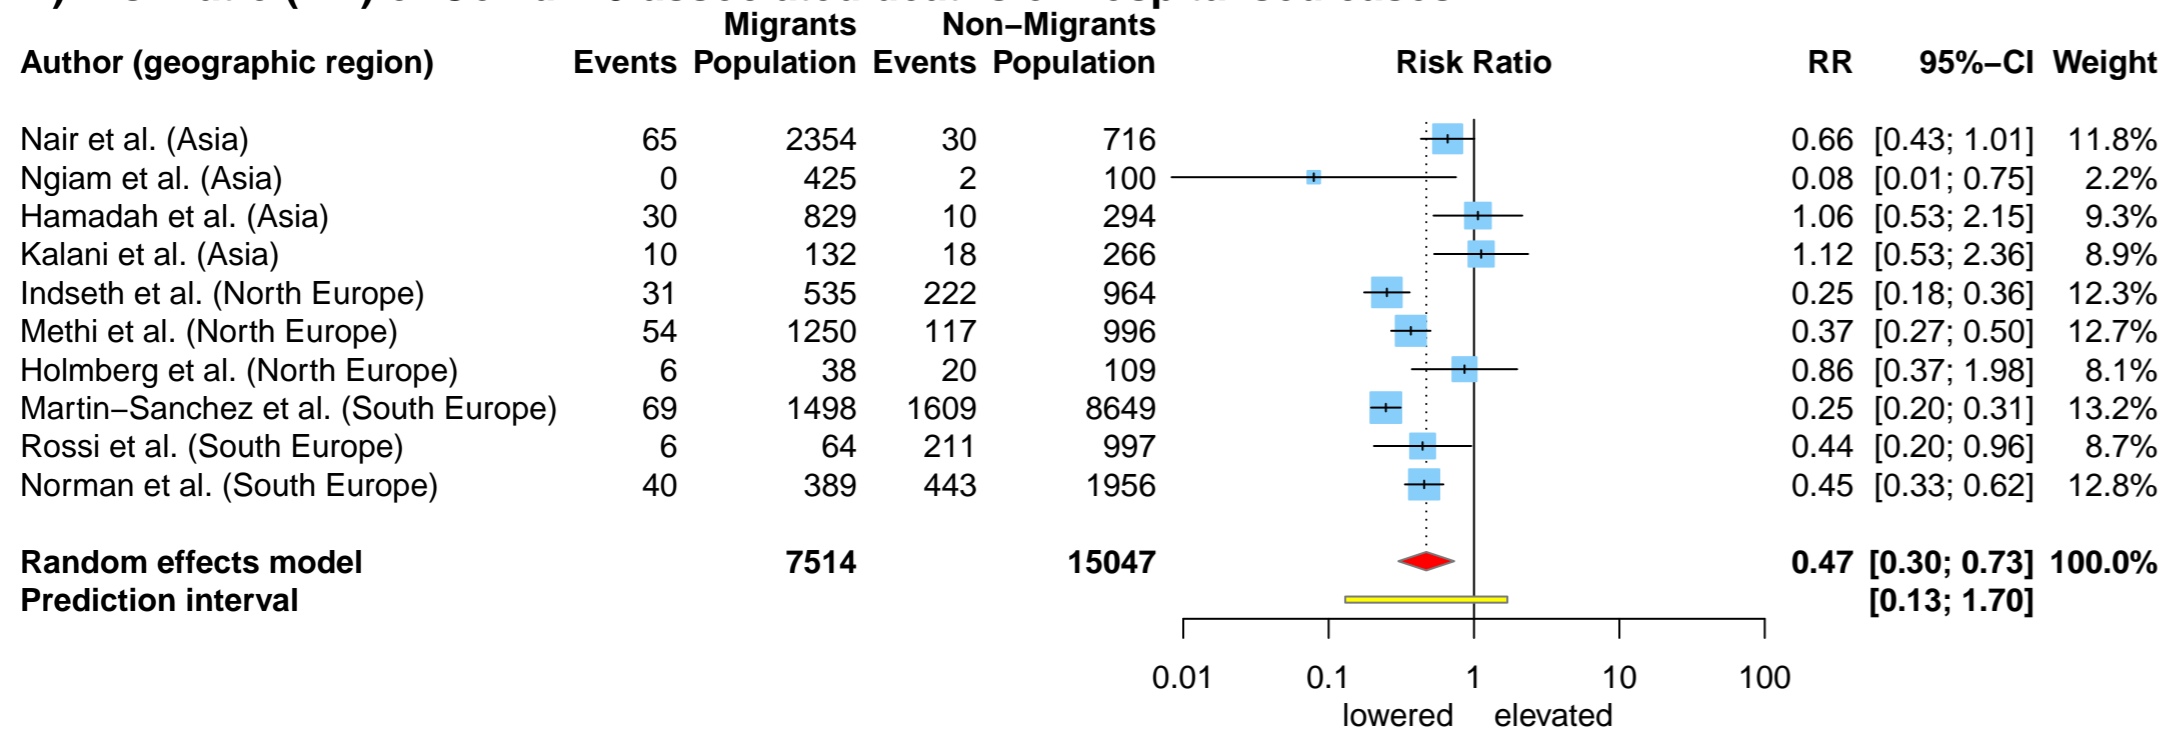

Heterogeneity:  $I^2 = 81\%$ ,  $\tau^2 = 0.2527$  [0.0823; 1.6095],  $\chi^2_9 = 47.59$  ( $p < 0.01$ )  
 Test for overall effect:  $t_{7,7} = -3.98$  ( $p < 0.01$ )

### B) Risk difference (RD) of Covid-19 associated deaths of hospitalised cases

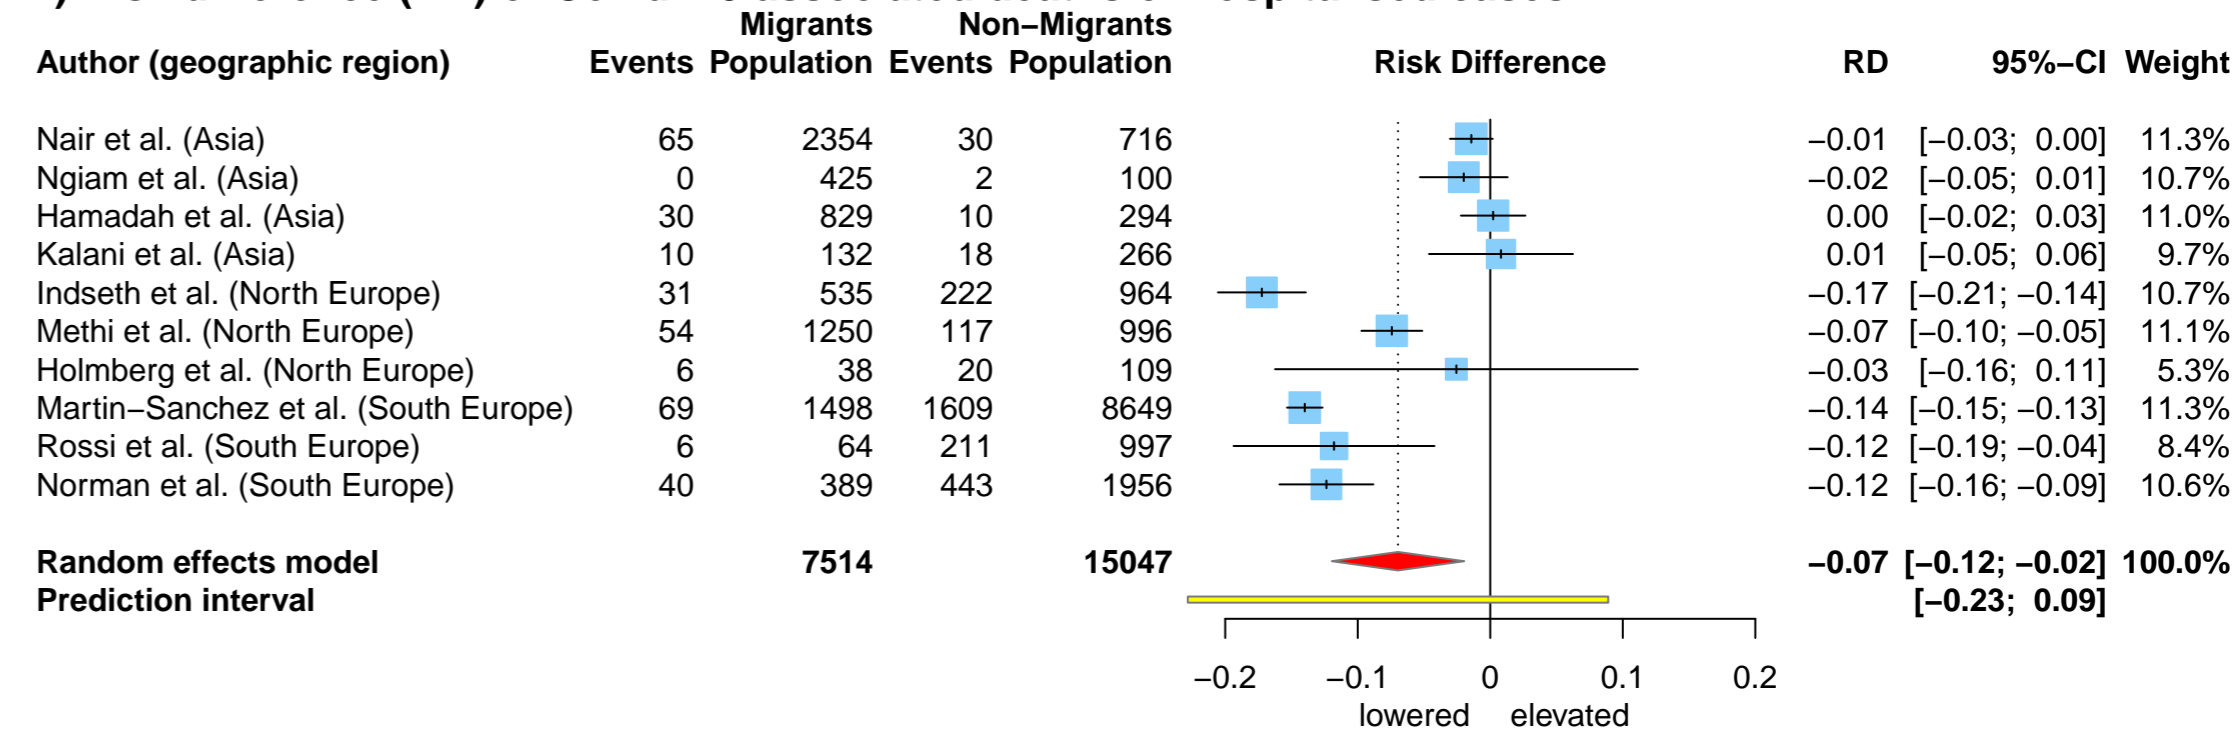

Heterogeneity:  $I^2 = 96\%$ ,  $\tau^2 = 0.0041$  [0.0017; 0.0141],  $\chi^2_9 = 244.63$  ( $p < 0.01$ )  
 Test for overall effect:  $t_{8,5} = -3.18$  ( $p = 0.01$ )

### C) Risk ratio (RR) of Covid-19 associated deaths (all deaths)

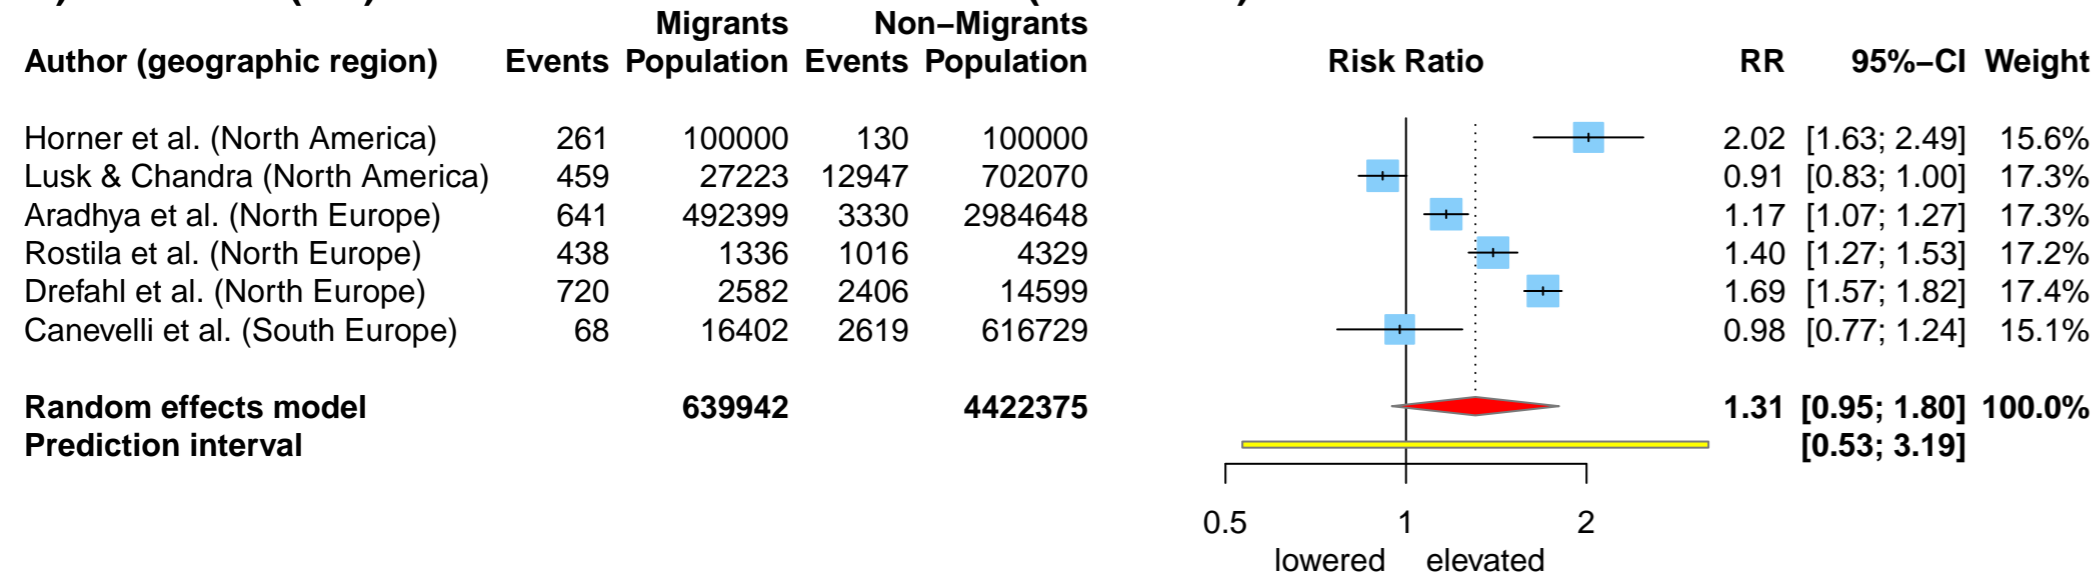

Heterogeneity:  $I^2 = 96\%$ ,  $\tau^2 = 0.0873$  [0.0306; 0.5748],  $\chi^2_5 = 137.70$  ( $p < 0.01$ )  
 Test for overall effect:  $t_5 = 2.14$  ( $p = 0.09$ )

### D) Risk difference (RD) of Covid-19 associated deaths (all deaths)

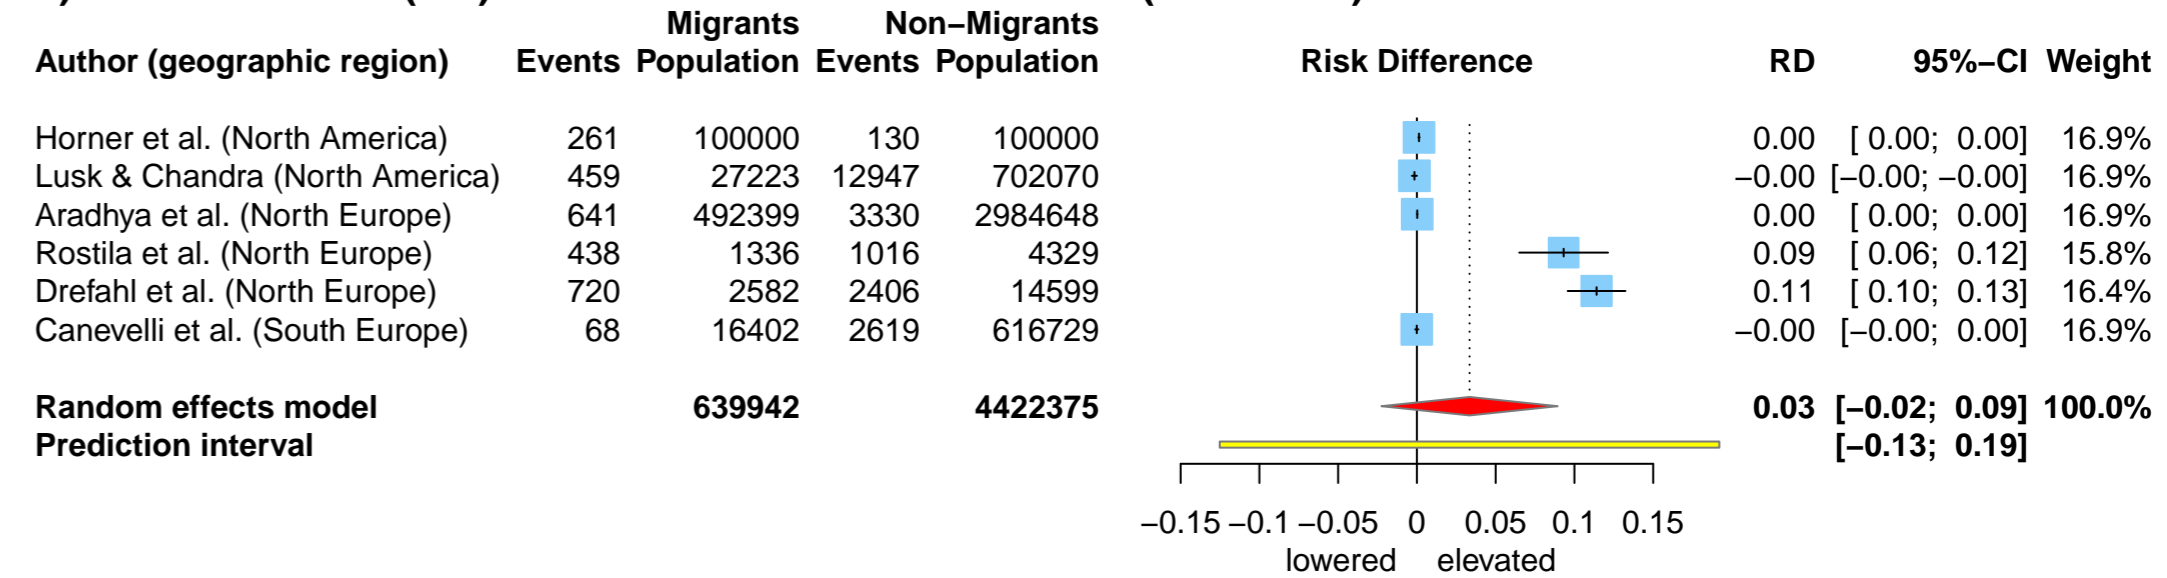

Heterogeneity:  $I^2 = 98\%$ ,  $\tau^2 = 0.0028$  [0.0010; 0.0174],  $\chi^2_5 = 226.37$  ( $p < 0.01$ )  
 Test for overall effect:  $t_5 = 1.54$  ( $p = 0.18$ )

| Exposures, risks and impacts on the...                                                                                                                                                                                                                                                                                                                                                            |                                                                                                                                                                                                                                                                                                    |                                                                                                                                                                                                                                                                                                                                                                                         |
|---------------------------------------------------------------------------------------------------------------------------------------------------------------------------------------------------------------------------------------------------------------------------------------------------------------------------------------------------------------------------------------------------|----------------------------------------------------------------------------------------------------------------------------------------------------------------------------------------------------------------------------------------------------------------------------------------------------|-----------------------------------------------------------------------------------------------------------------------------------------------------------------------------------------------------------------------------------------------------------------------------------------------------------------------------------------------------------------------------------------|
| ... micro/individual level                                                                                                                                                                                                                                                                                                                                                                        | ... meso/family, community level                                                                                                                                                                                                                                                                   | ... macro/society, state, health system                                                                                                                                                                                                                                                                                                                                                 |
|                                                                                                                                                                                                                                                                                                                                                                                                   | <ul style="list-style-type: none"> <li>- Crowded housing, incl. limited options for isolation</li> <li>- Need to use unsafe transportation</li> <li>- Social norms; e.g. pressure to participate in gatherings and events, risk perception compared to home country, religious fatalism</li> </ul> | <ul style="list-style-type: none"> <li>- No work security and/or governmental support</li> <li>- High risk jobs</li> <li>- "Import" of migrant labor for specific sectors amidst lockdown</li> </ul>                                                                                                                                                                                    |
| <ul style="list-style-type: none"> <li>- Non-affordability of personal protective equipment</li> <li>- Low health literacy</li> <li>- Language barriers</li> </ul>                                                                                                                                                                                                                                | <ul style="list-style-type: none"> <li>- Camps/Labor migrants: avoid penalisation of preventive/response measures</li> </ul>                                                                                                                                                                       | <ul style="list-style-type: none"> <li>- No/Late/Insufficient provision of health information, and neglect of linguistic diversity</li> <li>- No/Limited health coverage</li> <li>- Distrust in health system and authorities</li> </ul>                                                                                                                                                |
| <ul style="list-style-type: none"> <li>- Economic impacts, e.g. loss of job and income, food insecurity, debt</li> <li>- Impact on migration prospects/trajectory, incl. return migration, legal insecurity, loss of residence/work permits and benefits</li> <li>- Uncertainty, sense of failure</li> </ul> <p>Women: increased care workload<br/>Children: impact on education, child labor</p> | <ul style="list-style-type: none"> <li>- Impact on social and family dynamics; e.g. inability to fulfil breadwinner role, to send remittances</li> <li>- Impact of/on transnational lives; e.g. "living the pandemic twice", restricted options for family visits</li> </ul>                       | <ul style="list-style-type: none"> <li>- Impact on social/ health service provision</li> <li>- Increased discrimination</li> <li>- Health and social impacts (e.g. Othering) of differential measures in some settings; e.g. severe mobility restrictions in camps/ among in-house care workers; collective response measures (e.g. mass quarantine)</li> </ul>                         |
| <ul style="list-style-type: none"> <li>- Framing (e.g. "We've been through worse.")</li> <li>- Communication with family and peers (incl. access to technologies)</li> <li>- Recreational/Spiritual activities</li> <li>- Safety (e.g., having a safe place to live)</li> <li>- Financial resources</li> </ul>                                                                                    | <ul style="list-style-type: none"> <li>- Mutual (material, psychosocial) support among kin, peers and/or local community</li> <li>- Decent work conditions, incl. participation</li> </ul>                                                                                                         | <ul style="list-style-type: none"> <li>- State assistance (in theory; in practice often no access; e.g. food/financial aid, shelter)</li> <li>- Access to health information</li> <li>- Trust in authorities</li> <li>- Adaptation of services (e.g. online)</li> <li>- Legal status (allows to assert rights)</li> <li>- Effective intersectoral exchange and collaboration</li> </ul> |

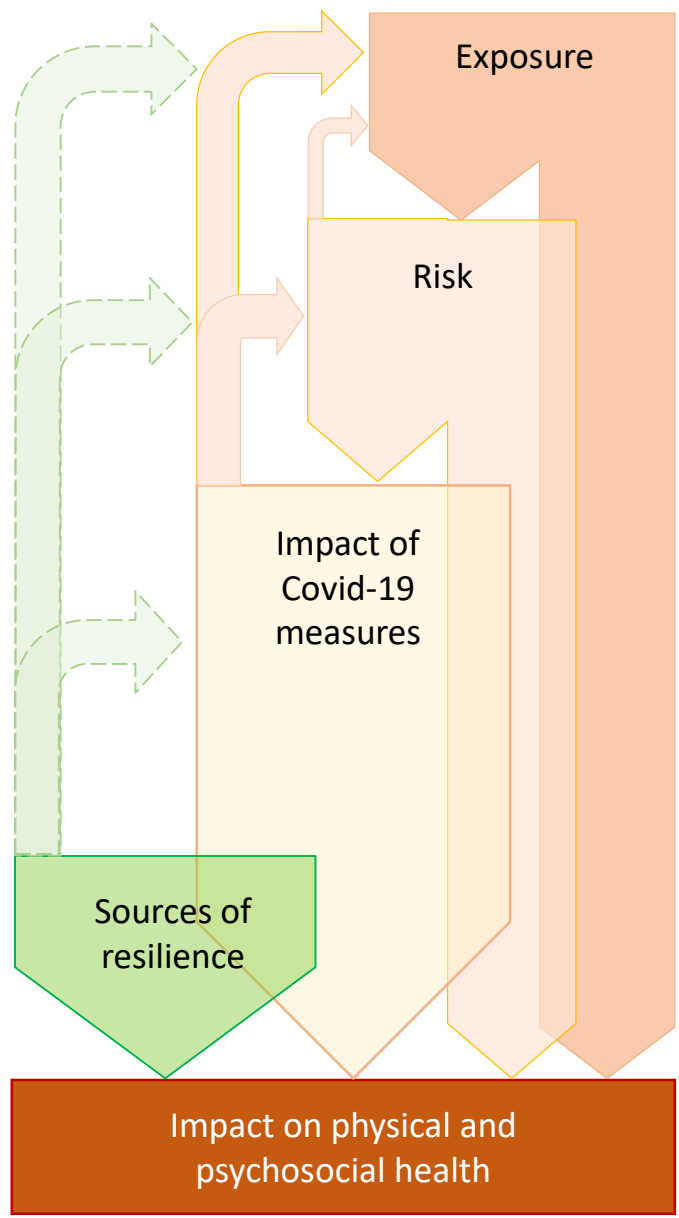

Source: https://medrxiv.org/content/10.1101/2023.08.03.23293586v1.full.pdf
